## **Blockade of pro-fibrotic response mediated by the miR-143/-145 cluster prevents targeted therapy-induced phenotypic plasticity and resistance in melanoma**

Diazzi S.<sup>1,2,3</sup>, Baeri A.<sup>2</sup>, Fassy J.<sup>2</sup>, Lecacheur M.<sup>1,3</sup>, Marin-Bejar O.<sup>4,5</sup>, Girard C.A.<sup>1,3</sup>, Lefevre L.<sup>1,3</sup>, Lacoux C.<sup>2</sup>, Irondele M.<sup>1</sup>, Mounier C.<sup>2</sup>, Truchi M.<sup>2</sup>, Couralet M.<sup>2</sup>, Carminati A.<sup>1,3</sup>, Berestjuk I.<sup>1,3</sup>, Larbret F.<sup>1,3</sup>, Vassaux G.<sup>2</sup>, Marine J.-C.<sup>4,5</sup>, Deckert M.<sup>1,3</sup>, Mari B.<sup>2,6\*†</sup> and Tartare-Deckert S.<sup>1,3,6†\*</sup>

<sup>1</sup>Université Côte d'Azur, INSERM, C3M, Nice 06200, France

<sup>2</sup>Université Côte d'Azur, CNRS, Institut de Pharmacologie Moléculaire et Cellulaire (IPMC), 06560 Sophia Antipolis, France

<sup>3</sup>Equipe labellisée Ligue Contre le Cancer 2016, Nice, France

<sup>4</sup>Laboratory For Molecular Cancer Biology, VIB Center for Cancer Biology, VIB, Leuven, Belgium

<sup>5</sup>Department of Oncology, KU Leuven, Leuven, Belgium

<sup>6</sup>FHU-OncoAge, Nice, France

\*Corresponding author. Email: [tartare@unice.fr](mailto:tartare@unice.fr) and [mari@unice.fr](mailto:mari@unice.fr)

† These authors contributed equally to this work

**Competing interests:** S.D., B.M., S.T.-D., and M.D. have a patent pending on use of anti-fibrotic drugs to enhance targeted therapies in melanoma (EP21305325.9). All other authors declare that they have no competing interests.

## 2 Abstract

3 Lineage dedifferentiation towards a mesenchymal-like state is a common mechanism  
4 of adaptive response and resistance to targeted therapy in melanoma. Yet, the transcriptional  
5 network driving this phenotypic plasticity remains elusive. Remarkably, this cellular state  
6 displays myofibroblast and fibrotic features and escapes MAPK inhibitors (MAPKi) through  
7 extracellular matrix (ECM) remodeling activities. Here we show that the anti-fibrotic drug  
8 Nintedanib/BIBF1120 is active to normalize the fibrous ECM network, enhance the efficacy  
9 of MAPK-targeted therapy and delay tumor relapse in a pre-clinical model of melanoma. We  
10 also uncovered the molecular networks that regulate the acquisition of this resistant  
11 phenotype and its reversion by Nintedanib, pointing the miR-143/-145 pro-fibrotic cluster as  
12 a driver of the therapy-resistant mesenchymal-like phenotype. Upregulation of the miR-143/-  
13 145 cluster under BRAFi/MAPKi therapy was observed in melanoma cells *in vitro* and *in*  
14 *vivo* and was associated with an invasive/undifferentiated profile of resistant cells. The 2  
15 mature miRNAs generated from this cluster, miR-143-3p and miR-145-5p collaborated to  
16 mediate phenotypic transition towards a drug resistant undifferentiated mesenchymal-like  
17 state by targeting Fascin actin-bundling protein 1 (FSCN1), modulating the dynamic crosstalk  
18 between the actin cytoskeleton and the ECM through the regulation of focal adhesion  
19 dynamics as well as contributing to a fine-tuning of mechanotransduction pathways. Our  
20 study brings insights into a novel miRNA-mediated regulatory network that contributes to  
21 non-genetic adaptive drug resistance and provides proof-of-principle that preventing MAPKi-  
22 induced pro-fibrotic stromal response is a viable therapeutic opportunity for patients on  
23 targeted therapy.

24

## 25 INTRODUCTION

26 Because of its high mutational burden, metastasis propensity, and resistance to  
27 treatment, cutaneous melanoma is one of the most aggressive human cancers and the  
28 deadliest form of skin cancer (1). Melanoma is a non-epithelial tumor that originates from  
29 neural crest-derived and pigment producing melanocytes in the skin. Genetic alterations in  
30 the *BRAF*, *NRAS*, or *NFI* genes define melanoma subtypes and lead to the MAPK pathway  
31 hyperactivation (2, 3). Current therapeutic options for BRAF<sup>V600E/K</sup> metastatic melanoma  
32 include MAPK-targeted therapies, which show remarkable efficacy during the first months of  
33 treatment (4, 5). However, the majority of patients treated with a combination of BRAF  
34 inhibitor (BRAFi) and MEK inhibitor (MEKi) inevitably relapse within months (6). Genetic  
35 mechanisms of resistance cannot singly explain the acquisition of therapy resistance in  
36 melanoma and non-genetic heterogeneity actively participates in drug tolerance (7, 8).  
37 Extensive studies have been carried out to dissect the non-mutational mechanisms of  
38 resistance (9, 10). Genetic and non-genetic mechanisms of resistance are frequently linked  
39 and not mutually exclusive (8). Non-genetic resistance is due to the intrinsic melanoma cell  
40 phenotypic plasticity, i.e., ability to undergo transcriptional and epigenetic reprogramming in  
41 response to environmental challenges or upon therapy (11). These adaptive mechanisms  
42 exploit the developmental plasticity of melanoma cells and often result in an undifferentiated  
43 state characterized by upregulation of receptor tyrosine kinases (RTK) like AXL,  
44 downregulation of melanocyte differentiation transcription factors MITF and SOX10 (12)  
45 and acquisition of mesenchymal and invasive features (9, 10, 13-18).

46 Tumors are shaped dynamically by reciprocal crosstalk between cancer cells and the  
47 ECM through cellular-ECM interactions and stromal matrix remodeling. Recent findings  
48 indicated that elevated ECM production and remodeling contribute to adaptive and acquired

49 resistance to BRAFi therapy by conferring a drug-protective niche to melanoma cells (19-22).  
50 Moreover, we recently reported that undifferentiated mesenchymal-like BRAFi-resistant cells  
51 exhibit myofibroblast/cancer associated fibroblast (CAF)-like features leading to pro-fibrotic  
52 ECM reprogramming *in vitro* and *in vivo* (22, 23). Cell autonomous ECM deposition and  
53 remodeling abilities adopted by melanoma cells after MAPKi treatment results in cross-  
54 linked collagen matrix and tumor stiffening fostering a feedforward loop dependent on the  
55 mechanotransducers YAP and MRTFA and leading to therapy resistance (22). Thus, this pro-  
56 fibrotic-like response, typical of the early adaptation and acquired resistance to MAPK  
57 inhibition, provides a therapeutic escape route through the activation of alternative survival  
58 pathways mediated by cell-matrix communications. However, the signaling networks  
59 underlying the acquisition of this undifferentiated, mesenchymal-like melanoma cell state and  
60 drug resistant behavior remain unclear.

61 We reasoned that therapeutic approaches aimed at preventing this targeted therapy-  
62 induced abnormal pro-fibrotic-like response could represent rationale combination strategies  
63 to normalize the fibrous stroma and overcome non-genetic resistance in BRAF<sup>V600E</sup>-mutant  
64 melanomas. We show here that the anti-fibrotic drug Nintedanib (BIBF1120) improves the  
65 response of the BRAFi/MEKi targeted therapy in a pre-clinical model of melanoma as well as  
66 in BRAF-mutated cell lines by preventing MAPKi-induced lineage dedifferentiation, ECM  
67 reprogramming and mesenchymal traits. We also identified the master regulator associated  
68 with the acquisition of this pro-fibrotic and dedifferentiation program, pointing the miR-143/-  
69 145 cluster as a driver of the phenotype switching to a drug resistant mesenchymal-like cell  
70 state.

71

## 72 **RESULTS**

### 73 **Nintedanib/BIBF1120 prevents MAPKi-induced pro-fibrotic-like response, enhances** 74 **targeted therapy efficiency and delays tumor relapse**

75 In order to limit ECM reprogramming and collagen remodeling associated with  
76 therapy resistance and relapse in melanoma, we tested the effect of the anti-fibrotic drug  
77 Nintedanib (BIBF1120), a triple inhibitor of PDGFR, VEGFR and FGFR used to treat  
78 idiopathic pulmonary fibrosis (IPF) in combination with BRAFi/MEKi in a syngeneic model  
79 of transplanted murine YUMM1.7 Braf-mutant melanoma (24). YUMM1.7 cells were  
80 subcutaneously injected and tumors were treated with vehicle, BIBF1120 alone, a  
81 combination of BRAFi plus MEKi, or the triple combination (Fig. 1A). BIBF1120 did not  
82 display any anti-melanoma effect when administered alone, slightly slowing down tumor  
83 growth but not triggering tumor volume decrease. Administration of the BRAFi/MEKi  
84 initially reduced tumor growth but after three weeks of treatment, tumor growth resumed and  
85 100% of tumors relapsed. Importantly, combination of MAPK-targeted therapies and  
86 BIBF1120 significantly delayed relapse and led to complete remission in 33% of mice (2 out  
87 of 6) (Fig. 1B-C and Supplementary Fig. 1A). Overall, the combined treatment significantly  
88 improved mice survival (Fig. 1C) without body weight loss or sign of toxicity throughout the  
89 study (Fig. 1D). As previously described in melanoma xenograft models (22), an extensive  
90 deposition of collagens and increased expression of ECM remodeling and myofibroblast  
91 markers were observed in YUMM1.7 tumors treated with the combination BRAFi/MEKi as  
92 revealed by picrosirius red staining of collagen fibers and qPCR analysis of typical molecular  
93 markers of tumor fibrosis. This response was significantly reduced by the co-administration  
94 of BIBF1120 (Fig. 1E-G and Supplementary Fig. 1B). Thus, combination of targeted therapy  
95 with the anti-fibrotic drug Nintedanib prevents the appearance of a pro-fibrotic matrix

96 observed upon MAPK-targeted therapy exposure and significantly delays the onset of  
97 resistance *in vivo*.

98 We next examined the impact of Nintedanib on ECM reprogramming and cell  
99 phenotype switching in the context of early adaptation and resistance to MAPK targeted  
100 therapy in human BRAF<sup>V600E</sup> mutated melanoma M238P cells. BIBF1120 strongly attenuated  
101 targeted drugs-induced ECM/myofibroblast-related signatures, prevented the undifferentiated  
102 AXL<sup>high</sup> MITF<sup>low</sup> phenotype switch (Supplementary Fig. 1C) and potentiated the effect of the  
103 BRAFi/MEKi cocktail on M238P cell viability (Supplementary Fig. 1D). The efficacy of the  
104 described treatment to reduce upregulation of Fibronectin (FN1) and LOXL2 expression was  
105 confirmed at protein levels by Western Blot analysis. Of note, a strong activation of AKT  
106 induced by the BRAFi/MEKi cocktail was fully inhibited by BIBF1120, suggesting that the  
107 anti-fibrotic drug is able to counteract the rewiring of alternative survival pathway observed  
108 upon MAPK oncogenic pathway inhibition (Supplementary Fig. 1E) (17).

109 We finally evaluated the effect of BIBF1120 on the undifferentiated mesenchymal-  
110 like resistant M238R cells obtained through chronic exposure of the M238P cells to the  
111 BRAFi Vemurafenib (17). We recently demonstrated that this resistant cell line exhibits low  
112 expression of the differentiation factor MITF and high AXL levels and displays a strong  
113 myofibroblast-like phenotype with expression of classical ECM and contractile markers such  
114 as smooth muscle actin- $\alpha$  ( $\alpha$ SMA) and Myosin light chain 2 (MLC2) as well as ECM  
115 remodeling activities compared with parental M238P cells (Fig. 1H) (22). BIBF1120 was  
116 able to attenuate melanoma undifferentiated state markers and expression of ECM and  
117 myofibroblast/CAF-related signature (Fig. 1I), but also significantly decreased cell viability  
118 and resistance to BRAFi (Fig. 1J). These findings indicate that an anti-fibrotic therapy is able

119 to revert the undifferentiated-mesenchymal resistant phenotype and potentiate targeted  
120 therapy in human melanoma cells.

121 **Suppression of MAPKi-induced resistant pro-fibrotic phenotype by Nintedanib is**  
122 **associated with loss of miR-143/145 cluster expression**

123 Next we investigated the molecular mechanisms associated with the emergence of  
124 MAPKi-induced mesenchymal and pro-fibrotic phenotype and its inhibition by  
125 Nintedanib/BIBF1120. Because several microRNAs (miRNAs), named FibromiRs, have  
126 been shown to play key roles in the initiation and progression of fibrotic processes in various  
127 organs (25-28), we performed an expression screening to compare the level of these  
128 FibromiRs in BRAF<sup>V600E</sup> mutant melanoma cells sensitive to MAPK-targeted therapies  
129 (M229P, M238P, M249P) compared to their corresponding resistant counterparts (17). The  
130 screening identified miR-143-3p and miR-145-5p, localized within the miR-143/145 cluster  
131 on chromosome 5 as the best hits with a strong upregulation in AXL<sup>high</sup> MITF<sup>low</sup>  
132 mesenchymal-like resistant M238R and M229R cells tested compared to parental cells (Fig.  
133 2A, Supplementary Fig. 2A). Similar results were obtained in the mesenchymal resistant  
134 UACC62R cells (29) (Supplementary Fig. 2A). In contrast, acquisition of resistance through  
135 secondary NRAS mutation was not associated with increased expression of miR-143-3p and  
136 miR-145-5p in the non-mesenchymal AXL<sup>low</sup> MITF<sup>high</sup> M249R cells (Fig. 2A,  
137 Supplementary Fig. 2A). We next examined whether a treatment with BRAFi, MEKi, or a  
138 combination of both was able to modulate the expression of the cluster. The two drugs, alone  
139 or in combination, significantly increased miR-143-3p and miR-145-5p expression levels in  
140 all BRAF<sup>V600E</sup> mutant melanoma cells tested including patient-derived short-term melanoma  
141 cultures (Supplementary Fig. 2B-F). This strong induction was abolished when the  
142 BRAFi/MEKi treatment was combined with BIBF1120, both in melanoma cell lines cultured

143 *in vitro* (Fig. 2B) and in the YUMM.1.7 syngeneic model (Fig. 2C) presented in Fig. 1.

144 Overall, the expression of the miR-143/-145 cluster paralleled the phenotypic switch

145 associated with a mesenchymal resistant phenotype.

146 Given the critical role of RTKs upregulation such as PDGFR and of the pro-fibrotic

147 TGF- $\beta$  signaling pathway overactivation in mesenchymal resistance (12, 17, 22, 23), we

148 stimulated MAPKi sensitive melanoma cells with PDGF-BB or with TGF- $\beta$  and analyzed

149 miR-143-3p and miR-145-5p expression. Both TGF- $\beta$  and PDGF-BB triggered a strong

150 upregulation of miR-143/-145 expression in M238P cells (Fig. 2D). Conversely, treatment of

151 mesenchymal BRAFi-resistant M238R cells with BIBF1120 but also with the TGF- $\beta$  receptor

152 inhibitor SB431542 and the pan-AKT inhibitor GSK690693 significantly decreased the

153 expression of the two mature miRNAs (Fig. 2E), indicating that both PDGF and TGF- $\beta$

154 pathways control the expression of the miR-143/-145 cluster in melanoma cells.

155 Finally, we investigated the expression of these miRNAs in several Patient-Derived

156 Xenograft (PDX) samples that acquired resistance to BRAFi/MEKi combo-therapy and

157 exhibited distinct phenotypic and molecular profiles. (Fig. 2F) (30). Upregulation of miR-

158 143/-145 cluster between therapy naïve and resistant cells was observed in two different PDX

159 samples, MEL015 and MEL003, with a predominant invasive/undifferentiated transcriptome

160 profile (Fig. 2F-G) (30). The MEL015 resistant model also presented elevated expression of

161 ECM remodeling, myofibroblast and pro-fibrotic markers such as *COL1A1*, *LOXL2*, *CYR61*,

162 *THBS1* and *MYL9*. In contrast, we did not observe an upregulation of the cluster in drug

163 resistant lesions from the two additional PDX models, MEL006 and MEL047, in which the

164 mesenchymal-like signature is not overrepresented (Fig. 2F-G). These data indicate that

165 upregulation of the pro-fibrotic miR-143/-145 cluster is also observed in PDX MAPKi

166 resistant melanomas associated with an invasive/undifferentiated transcriptome profile.



167 **miR-143/-145 cluster promotes melanoma cell dedifferentiation towards a pro-fibrotic**  
168 **mesenchymal-like state and resistance to MAPK therapeutics.**

169 To confirm a potential link between the miR-143/-145 cluster and ECM  
170 reprogramming, we first used a gain of function approach consisting in the transient  
171 overexpression of miR-143-3p or miR-145-5p in various therapy-naïve BRAF-mutant  
172 melanoma cells (Supplementary Fig. 3A). The results showed increased expression of  
173 transcripts related to ECM structure and remodeling as well as myofibroblast/CAF markers in  
174 cells overexpressing either miRNA compared to miR-Neg control cells (Fig. 3A).  
175 Conversely, we next tested whether miR-143-3p or miR-145-5p inhibition can reverse the  
176 phenotypic pro-fibrotic response induced by oncogenic BRAF inhibition in M238P  
177 melanoma cells. BRAFi treatment was combined with Locked nucleic acid (LNA)-modified  
178 antisense oligonucleotides (ASOs) designed against miR-143 (LNA-143), miR-145 (LNA-  
179 145) or a control LNA ASO (LNA-Ctrl). RT-qPCR analysis showed that the BRAFi-induced  
180 ECM- and myofibroblast/CAF-related gene signature was significant inhibited by LNA-143  
181 and LNA-145 ASOs (Fig. 3B). These results were confirmed at protein level by Western Blot  
182 analysis of cell lysates and conditioned media of ECM proteins and cross-linking enzymes as  
183 well as myofibroblast/CAF markers using same gain- or loss-of-function approaches (Fig.  
184 3C-D and Supplementary Fig. 3B).

185 We next investigated whether the cluster contributed to the acquisition of the slow  
186 cycling, undifferentiated and invasive cell state. Melanoma cells experienced reduced cell  
187 proliferation after ectopic expression of miR-143-3p or miR-145-5p as visualized by Western  
188 Blot analysis of cell cycle markers (Supplementary Fig. 4A) and by analysis of cell  
189 confluence by live-cell imaging (Fig. 3E and Supplementary Fig. 4B), with an accumulation  
190 of cells in the G2/M phase (Supplementary Fig. 4C). Inhibition of proliferation was also

191 accompanied by enhancement of cell migratory abilities, as shown using Boyden chamber  
192 assays (Fig. 3F and Supplementary Fig. 4D) as well as by the acquisition of an  
193 undifferentiated phenotype, with decreased levels of MITF and SOX10, and increased levels  
194 of AXL, PDGFR, EGFR, NGFR and SOX9 (Fig. 3G and Supplementary Fig. 4E).  
195 Lentivirus-mediated stable overexpression of the two miRNAs in two distinct melanoma cell  
196 lines reproduced increased ECM protein production, inhibition of cell proliferation and  
197 transition to an undifferentiated/invasive phenotype (Supplementary Fig. 5A-E) observed  
198 upon transient transfection. Acquisition of this features was also linked to a decreased  
199 intrinsic sensitivity to MAPKi treatment, as measured by crystal violet survival assays  
200 performed on melanoma cells stably overexpressing miR-143/-145 cluster compared to  
201 control cells (Supplementary Fig. 5F). Conversely, targeting the two miRNAs by ASOs in  
202 combination with BRAFi improved the efficacy of the targeted therapy (Fig. 3H,  
203 Supplementary Fig. 6A-B), demonstrating that miR-143/-145 cluster upregulation in response  
204 to BRAF<sup>V600E</sup> pathway inhibition represents a pivotal adaptive resistance mechanism to  
205 MAPK therapeutics.

### 206 **Identification of miR-143-3p / miR-145-5p targets functionally associated with the** 207 **undifferentiated mesenchymal-like phenotype in melanoma cells**

208 To identify miR-143-3p and miR-145-5p targets associated with the resistant  
209 mesenchymal phenotype, we first combined *in silico* target prediction tools and experimental  
210 transcriptomic approaches using the miRonTop web tool (31) in M238R or M238P cells  
211 following transient transfection of mimics (Fig. 4A-B) or stable lentivirus transduction.  
212 Functional annotation of the gene expression profiles associated with miRNA overexpression  
213 showed a strong overlap in pathways associated with cell migration and invasion, cell cycle  
214 as well as cytoskeleton organization (Supplementary Table 1). The predicted targets for each

215 of the mature miRNAs were significantly overrepresented among the downregulated genes in  
216 response to the corresponding mimics transfection (Fig. 4B). A first set of target candidates  
217 were identified by crossing these predicted targets and the genes shown experimentally to be  
218 downregulated in resistant M238R cells compared to parental M238P cells (Fig. 4C).

219         Second, RNAs from cells stably overexpressing the miR-143/-145 cluster were  
220 analyzed by RNA-sequencing and processed through Ingenuity Pathway Analysis (IPA) to  
221 identify the common regulators (transcription factors, growth factors, cytokines,  
222 transmembrane receptors, kinases, and phosphatases) between parental cells overexpressing  
223 the cluster and resistant cells (Fig. 4D). These analyses notably highlighted changes related to  
224 decreased cell proliferation, increased cell invasion and fibrotic pathways activation. To  
225 narrow the best target candidates, we finally compared the best-predicted targets based on the  
226 two different gain-of-function approaches (Supplementary Table 2 and 3). This strategy  
227 resulted in selecting one target candidate for miR-143-3p, 6 target candidates for miR-145-5p  
228 and 2 target candidates for both miR-143-3p and miR-145-5p (Fig. 4E). We started with  
229 investigations on the F-actin bundling protein Fascin1 (FSCN1), a key regulator of  
230 cytoskeleton dynamics, previously associated with tumor growth, migration, invasion and  
231 metastasis (32). Using long-reads Nanopore sequencing data, we confirmed lower levels of  
232 FSCN1 transcript in M238R compared with M238P cells while reads corresponding to the  
233 putative miR-143/-145 cluster primary transcript could be only detected in M238R cells  
234 (Supplementary Fig. 7A). The characterization of hFSCN1 3'UTR sequence revealed the  
235 presence of 2 miR-143-3p and 4 miR-145-5p binding sites. Validation of these sites was first  
236 performed using a luciferase reporter corresponding to the full 3'UTR FSCN1 harboring WT  
237 or a mutated sequence of the miRNA recognition elements (Fig. 4F and Supplementary Fig.  
238 7B). Finally, qPCR and Western Blot analyses confirmed that FSCN1 was downregulated at

239 both mRNA and protein levels upon miR-143-3p and miR-145-5p ectopic expression in  
240 various melanoma cells as well as in cells stably overexpressing the cluster (Fig. 4G-H and  
241 Supplementary Fig. 7C-D).

242 **FSCN1 is a functional miR-143/-145 target contributing to the phenotypic switch**  
243 **towards the undifferentiated / mesenchymal-like and resistant state**

244         Considering the strong expression of the miR-143/-145 in BRAF<sup>V600E</sup> mutant  
245 mesenchymal-like resistant cells compared to their parental counterparts, we compared  
246 FSCN1 expression levels in various pairs of resistant and sensitive melanoma cell lines.  
247 Western blot indicated that FSCN1 protein levels were lower in undifferentiated  
248 mesenchymal resistant cells compared to parental cells, while on the other hand they were  
249 elevated in M249R melanoma cells acquiring genetic resistance compared to parental cells  
250 (Supplementary Fig. 8A). We then confirmed the opposite regulation of FSCN1 and miR-  
251 143/-145 cluster expression upon BRAFi treatment both *in vivo* using xenografted nude mice  
252 and *in vitro* with different human BRAF mutant melanoma cells (Fig. 5A and Supplementary  
253 Fig. 8B). Finally, FSCN1 levels were partially restored in M238P cells treated with BRAFi  
254 when Vemurafenib was combined with the LNA-miR-143 or LNA-miR-145, as visualized by  
255 immunofluorescence staining (Fig. 5B), suggesting that FSCN1 downregulation upon BRAFi  
256 exposure is due to increased expression of miR-143-3p and miR-145-5p.

257         To evaluate the influence of FSCN1 downregulation among the various cellular  
258 effects mediated by miR-143-3p and miR-145-5p, we then performed a loss-of-function  
259 experiment using FSCN1 specific siRNAs in BRAF-mutant parental melanoma cells.  
260 Western Blot analysis of cell cycle markers (Fig. 5C and Supplementary Fig. 8C) and cell  
261 confluence analysis by live-cell imaging (Supplementary Fig. 8D) showed reduced

262 proliferation after downregulation of FSCN1. This slow-cycling state induced by FSCN1  
263 silencing was accompanied by an enhancement in cell migratory abilities (Fig. 5D and  
264 Supplementary Fig. 8E). Moreover, FSCN1 invalidation modulated melanoma cells  
265 differentiation state, inducing the switch to a poorly differentiated phenotype characterized by  
266 reduced levels of MITF and increased levels of AXL and NGFR (Fig. 5E and Supplementary  
267 Fig. 8F).

268         Using the opposite strategy, we then asked whether ectopic expression of FSCN1 was  
269 able to revert the mesenchymal-like phenotype and restore drug sensitivity in BRAFi-  
270 resistant melanoma cells. Resistant cells transduced for stable FSCN1 overexpression  
271 displayed an increased proliferative rate compared to cells transduced with a control  
272 lentivirus (Fig. 5F). This effect was linked to diminished migratory abilities (Supplementary  
273 Fig. 9A). This phenotypic transition was further confirmed by Western Blot analysis of  
274 differentiation markers in various mesenchymal resistant cells, with increased expression of  
275 melanocytic markers (MITF, SOX10) and decreased levels of invasive markers (AXL,  
276 SOX9) as well as decreased production of ECM proteins and ECM-remodeling enzyme  
277 LOXL2 (Fig. 5G and Supplementary Fig. 9B). Finally, mirroring the effect of miR-143/-145  
278 ASOs, forced expression of FSCN1 in M238R cells decreased viability in the presence of  
279 BRAFi (Fig. 5H). Overall these data underline the central function of the miR-143/-  
280 145/FSCN1 axis in the acquisition of an undifferentiated, mesenchymal-like cell state  
281 associated with therapy resistance.

282 **The miR-143-/145 cluster/FSCN1 axis regulates actin cytoskeleton dynamics and**  
283 **mechanopathways**

284 Acquisition of the mesenchymal-like resistant state implies a massive cytoskeletal  
285 rearrangement reflected by morphological changes with cells assuming a flattened and  
286 spindle-like shape. Based on the key function of FSCN1 in F-actin microfilaments  
287 reorganization, we specifically analyzed the contribution of the miR-143/-145 cluster/FSCN1  
288 axis on actin cytoskeleton dynamics. Transient overexpression of miR-143-3p and miR-145-  
289 5p reproduced these morphological changes, as shown by F-actin staining and increased cell  
290 area (Fig. 6A and Supplementary Fig. 10A). To better understand the crosstalk between ECM  
291 remodeling and rearranged actin dynamics, we performed immunofluorescent staining of  
292 focal adhesions, multi-protein structures that connect ECM to the acto-myosin cytoskeleton.  
293 An increased number of focal adhesions revealed by phospho-Paxillin staining characterized  
294 melanoma cells expressing miR-143-3p or miR-145-5p (Fig. 6B and Supplementary Fig.  
295 10B). This result was also confirmed by Western Blot analysis of focal adhesion components  
296 such as phospho-FAK and phospho-SRC (Supplementary Fig. 10C). In addition, we observed  
297 an increase of phosphorylated and total forms of MLC2 and phosphorylated Signal  
298 Transducer and Activator of Transcription 3 (STAT3) upon cluster overexpression,  
299 suggesting the activation of the ROCK/JAK/STAT3 acto-myosin contractility pathway by the  
300 two miRNAs. We then investigated whether FSCN1 downregulation produced a similar  
301 effect on actin dynamics. Indeed, FSCN1 knockdown led to actin cytoskeleton reorganization  
302 with a significant cell area increase (Fig. 6C and Supplementary Fig. 10D) as well as an  
303 increased number of focal adhesions per cell (Fig. 6D and Supplementary Fig. 10E).

304 Acto-myosin remodeling critically regulates the cellular localization of  
305 mechanotransducers such as the Hippo pathway transcriptional co-activator YAP and the  
306 serum responsive factor co-activator MRTFA, two factors previously associated with  
307 resistance to MAPK-targeted therapies and pro-fibrotic responses (22, 23, 29, 33). Expression

308 of miR-143-3p and miR-145-5p in therapy-naïve melanoma cells enhanced YAP and  
309 MRTFA nuclear localization as shown by immunofluorescent staining (Fig. 7A-B and  
310 Supplementary Fig. 11A-B). This increased YAP and MRTF activity was also confirmed by  
311 upregulated expression of several target genes (*CTGF*, *CYR61*, *AMOTL2*, *THBS1*, *AXL*), as  
312 shown by RT-qPCR analysis (Fig. 7C and Supplementary Fig. 11C). Again, these changes in  
313 cytoskeleton organization were reproduced by FSCN1 knockdown, with nuclear translocation  
314 of MRTFA and YAP (Fig. 7D-E and Supplementary Fig. 11D) and increased target gene  
315 expression (Fig. 7F). Finally, using the opposite strategy, we tested whether ectopic  
316 expression of FSCN1 was able to revert the constitutive activation of mechanical pathways  
317 typical of this cell state. Indeed, forced expression of FSCN1 in mesenchymal resistant cells  
318 significantly attenuated nuclear localization of YAP and MRTFA as well as their  
319 transcriptional activity (Supplementary Fig. 12A-C). Overall, our data underline the central  
320 function of the miR-143/-145/FSCN1 axis in the regulation of actin cytoskeleton dynamics  
321 and mechanopathways, leading to the acquisition of an undifferentiated, mesenchymal-like  
322 cell state associated with therapy resistance.

## 323 **DISCUSSION**

324 Treatments against advanced melanoma invariably end with therapy resistance and  
325 failure. Preventing resistance and tumor relapse on therapies targeting the MAPK oncogenic  
326 pathway still remains a challenge in successful melanoma clinical management. Our present  
327 study reveals that combination of the anti-fibrotic drug Nintedanib with targeted therapy  
328 provides therapeutic benefit in pre-clinical models of melanoma. We showed that Nintedanib  
329 is able to prevent the acquisition by melanoma cells of an undifferentiated mesenchymal-like  
330 phenotype, an aggressive cell state previously shown to be associated with the expression of  
331 pro-fibrotic markers, acquisition of myofibroblast/CAF-like activities and enhanced

332 mechanosignaling as well as drug resistance (22, 23). Importantly, we provided evidence that  
333 the triplet combination BRAFi/MEKi/Nintedanib is active to normalize the fibrous collagen  
334 network, delay the onset of resistance and improve mice survival. We also confirmed the  
335 efficacy of this therapeutic combination in human BRAF<sup>V600E</sup> mutant melanoma cells and  
336 described its potential to impair phenotype switching and improve response to MAPK  
337 targeted therapy (Fig. 8).

338 Nintedanib (BIBF-1120) is a multiple tyrosine kinase inhibitor, targeting PDGFR ( $\alpha$   
339 and  $\beta$ ), FGFR-1, -2, -3, and -4 and VEGFR-1, -2, and -3 as well as several intracellular  
340 tyrosine kinases such as Src, Lck or Lyn. It has been approved for the treatment of Idiopathic  
341 Pulmonary Fibrosis (IPF) following several clinical trials demonstrating clinical efficacy in  
342 slowing disease progression (34). Nintedanib was shown to interfere with fundamental  
343 processes in lung fibrosis in a variety of *in vitro* assays performed on primary lung fibroblasts  
344 from patients with IPF, notably the inhibition of growth factor-induced  
345 proliferation/migration and TGF- $\beta$ -induced myofibroblast activation as well as the down-  
346 regulation of ECM proteins (35). However, although substantial pre-clinical evidence  
347 demonstrates that Nintedanib has anti-fibrotic but also anti-inflammatory and anti-angiogenic  
348 activity, the exact contribution of inhibition of specific kinases to the activity of the drug in  
349 IPF has not been established and its precise anti-fibrotic mechanism(s) of action is not  
350 known.

351 In melanoma, the effects of Nintedanib are likely achieved through the normalization  
352 of the fibrotic and drug-protective ECM generated upon MAPK-targeted therapy exposure.  
353 We found that combined administration of Nintedanib and MAPK-targeted therapy dampens  
354 the increased miR-143/-145 cluster expression triggered by oncogenic BRAF pathway  
355 inhibition, suggesting that inhibition of ECM reprogramming in presence of Nintedanib is, at



356 least partially, mediated by preventing upregulation of these two “FibromiRs”. Induction of  
357 the miR-143/-145 cluster paralleled the phenotypic switch associated with the  
358 undifferentiated mesenchymal-like phenotype and high expression levels of the two miRNAs  
359 are correlated with the mesenchymal MAPKi-resistant phenotype in all BRAF<sup>V600E</sup> mutant  
360 human melanoma cell lines known to overexpress several RTKs including the PDGFR.  
361 Analysis of PDX models confirmed that expression levels of miR-143-3p and miR-145-5p  
362 are associated with a predominant invasive/undifferentiated transcriptomic profile in resistant  
363 lesions. Elevated levels of these miRNAs following BRAFi/MEKi treatment are likely due  
364 primarily to the direct inhibition of the MAPK pathway, as oncogenic signals including  
365 activation of the MAPK pathway strongly inhibit expression of the cluster in several  
366 epithelial cancers (36). In addition, we have shown a positive regulation of the cluster by  
367 PDGF or TGF- $\beta$  signaling, as previously observed in the context of fibrosis and smooth  
368 muscle cell differentiation (37, 38). This observation supports the notion that pro-fibrotic  
369 signaling pathways typical of the mesenchymal resistance drive expression of the miR-143/-  
370 145 cluster in melanoma cells. Besides, the AKT pathway could also upregulate expression  
371 levels of the two miRNAs. Accordingly, previous studies stated that *PTEN* deletion favors  
372 the onset of a fibrotic phenotype in lung fibrosis and increased Fibronectin deposition in  
373 melanoma (20, 39). The observation that Nintedanib abrogated both AKT activation and  
374 miR-143/-145 expression in melanoma cells is in agreement with the importance of this  
375 pathway for acquisition and maintenance of drug resistance. Overall, our data indicate that  
376 Nintedanib can target both pro-fibrotic and survival pathways, mediated at least in part  
377 through PDGFR activation and converging to miR-143/-145 cluster expression.

378         The role of miR-143 and miR-145 in cancer has been widely debated in the last  
379 decade (40). The tumor suppressive role traditionally attributed to the cluster (41) has been

380 challenged by recent genetic and cellular expression studies pointing mesenchymal cells as  
381 the main source of the cluster (42, 43). In melanoma, we disclosed that miR-143-3p and miR-  
382 145-5p promote the acquisition of an invasive and mesenchymal-like phenotype linked to  
383 drug adaptation and resistance. The importance of miR-143/145 cluster in the acquisition of  
384 this undifferentiated state is further highlighted with a loss-of-function approach showing that  
385 miR-143-3p and miR-145-5p inhibitors are able to limit ECM reprogramming and activation  
386 of mechanopathways, and improve anti-BRAF treatment efficacy. While further work using a  
387 combination of ASOs directed against the two mature miRNAs or the primary transcript is  
388 necessary to confirm these promising results in a melanoma xenograft model, we propose that  
389 the miR-143/-145 cluster may represent a novel attractive therapeutic target to prevent cells  
390 from switching to a mesenchymal/invasive state and tumor relapse after targeted therapy.

391 Our study shows that mechanistically the miR-143/-145 cluster functions in  
392 melanoma cells through targeting the cytoskeletal regulator FSCN1, one of the best hits  
393 identified by our screening, confirming previous studies indicating that FSCN1 is a direct  
394 target of both mature miRNAs (44, 45). FSCN1 has been widely studied in several  
395 malignancies for its role in promoting invasion and metastasis. However, a complete  
396 characterization of FSCN1 functions in melanoma is still missing and some published studies  
397 are controversial (46-48). Consistent with our study, FSCN1 downregulation was shown to  
398 inhibit melanoma cell proliferation (47) and to promote invasion (48). Interestingly, FSCN1  
399 expression levels appear to be related to the differentiation stage of melanocytes and transient  
400 FSCN1 expression in melanoblasts precursors is required for their proliferation and  
401 migration, with FSCN1 knockout resulting in hypopigmentation in adult mice (47). Notably,  
402 miR-145-5p is also considered as a key regulator of the pigmentary process in melanocytes, a  
403 role mediated by the downregulation of pigmentation genes and melanosome trafficking

404 components, including FSCN1 (49). These findings are in line with our data showing that  
405 FSCN1 downregulation drives phenotypic transition to an undifferentiated cell state  
406 associated with very low expression of the master regulator of melanocyte differentiation and  
407 function, MITF. FSCN1 downregulation may thus be exploited to generate lineage plasticity  
408 and revert to a poorly differentiated phenotype during drug adaptation of melanoma cells.

409         The miR-143/145 FSCN1 axis also directly modulates the dynamic crosstalk between  
410 the actin cytoskeleton and the ECM through the regulation of focal adhesion dynamics. This  
411 process is known to promote melanoma survival through FAK signaling and the ROCK  
412 pathway to induce acto-myosin-mediated contractile forces (50-52). The involvement of the  
413 miR-143/-145 cluster is also linked to a fine-tuning of mechanotransduction pathways.  
414 Enhanced YAP and MRTFA nuclear translocation reinforces the fibrotic-like phenotype  
415 promoted by the cluster and probably facilitates resistance acquisition, as previously  
416 demonstrated for these mechanotransducers (22, 29, 52). Interestingly, MRTFA has been  
417 involved in the transcriptional regulation of miR-143 and miR-145 expression (38, 53, 54),  
418 suggesting that this transcriptional state might be further stabilized by a positive feedback  
419 loop. Such regulatory loops between miRNAs and transcription factors have been previously  
420 described in the establishment and maintenance of melanoma phenotypic states (55, 56).

421         Despite the ability of FSCN1 downregulation to mimic the main functional effects  
422 observed by the ectopic expression of the miR-143/-145 cluster, we do not exclude the  
423 contribution of others targets in the acquisition of the mesenchymal resistant phenotype  
424 promoted by the cluster. FSCN1 knockdown failed to reproduce the global ECM signature  
425 reprogramming induced by the miR-143/-145 cluster. MiRNA target prediction tools  
426 identified a plethora of genes involved in cell cycle regulation, DNA damage response,

427 inflammatory pathways, and actin-SRF regulatory network that need to be fully investigated  
428 in this context.

429         We conclude that our work opens new therapeutic avenues to prevent or delay the  
430 onset of targeted therapy resistance in melanoma. Our findings provide a rationale for  
431 designing clinical trials with Nintedanib and potentially other anti-fibrotic agents to enhance  
432 treatment efficacy in BRAF-mutated melanoma patients. We also bring an original  
433 mechanism of action directly linking the inhibition of the BRAF oncogenic pathway with the  
434 induction of the miR-143/-145 FibromiR cluster promoting the acquisition of a drug resistant,  
435 undifferentiated and mesenchymal-like cell state (Fig. 8). Finally, we propose the cluster as a  
436 new promising biomarker or druggable target to overcome non-genetic processes of  
437 phenotypic plasticity-driven therapeutic resistance.

## 438 **MATERIALS AND METHODS**

### 439 **Cell lines and reagents:**

440         Isogenic pairs of Vemurafenib-sensitive and resistant cells (M229, M238, M249)  
441 were provided by R. Lo. UACC62 Vemurafenib-sensitive (UACC62P) and resistant cells  
442 (UACC62R) were provided by Neubig's lab. 1205Lu cells were from Rockland. YUMM1.7  
443 mouse melanoma cells were a kind gift from M. Bosenberg (24). Melanoma cells were  
444 cultured in Dulbecco's modified Eagle medium (DMEM) supplemented with 7% FBS  
445 (Hyclone) and 1% penicillin/streptomycin. Resistant cells were continuously exposed to 1  
446  $\mu$ M of Vemurafenib. Cell lines were routinely tested for the absence of Mycoplasma by PCR.

447         Short-term cultures of patient melanoma cells MM034 and MM099 were generated in  
448 the laboratory of Pr G. Ghanem (ULB). Culture reagents were purchased from Thermo Fisher  
449 Scientific. BRAFi (PLX4032, Vemurafenib), MEKi (GSK1120212, Trametinib), SB431542,

450 GSK690693, and Nintedanib (BIBF1120) were from Selleckem. Recombinant human TGF-  
451  $\beta$ 1 was from ImmunoTools. Recombinant human PDGF-BB was from Peprotech.

452 Information on all reagents used is provided in tables S4, S5 and S6.

453 ***In vivo* experiments:**

454 Mouse experiments were carried out according to the Institutional Animal Care and  
455 the local ethical committee (CIEPAL-Azur agreement NCE/2018-483).  $4 \times 10^5$  YUMM1.7  
456 cells were injected in both flanks of C57BL/6 mice. Tumors were measured with caliper and  
457 treatments were started when the tumors reached a volume of  $0.1 \text{ cm}^3$ , after randomization of  
458 mice into control and test groups. Vemurafenib (30 mg/kg), Trametinib (0.3 mg/kg), and  
459 Nintedanib (50 mg/kg) were administered by oral gavage three times per week. Control mice  
460 were treated with vehicle only. Animals were sacrificed when the tumors reached a volume  
461 of  $1 \text{ cm}^3$ . After animal sacrifice, tumors were dissected, weighed and snap-frozen in liquid  
462 nitrogen for RNA or protein extraction and immunofluorescence analysis (embedded in OCT  
463 from Tissue-Tek). Tumors for picrosirius red staining were fixed in formalin. Melanoma cell-  
464 derived xenograft experiments performed on 6-week-old female athymic nude nu/nu mice  
465 were described in (22). Melanoma patient-derived xenografts models were established by  
466 TRACE (PDX platform; KU Leuven) using tissue from melanoma patients undergoing  
467 surgery at the University Hospitals KU Leuven. Written informed consent was obtained from  
468 all patients and all procedures were approved by the UZ Leuven Medical Ethical Committee  
469 (S54185/S57760/S59199) and carried out in accordance with the principles of the Declaration  
470 of Helsinki.

471 **Statistical analysis:**

472 Statistical analysis was performed using GraphPad Prism. Unpaired two-tailed  
473 Student's T-test or unpaired two-tailed Mann Whitney test was used for statistical comparison  
474 between two groups. For comparisons between multiple groups, one-way ANOVA followed  
475 by Bonferroni's *post-hoc* tests was used. For statistical analysis of cell confluence live  
476 imaging, two-way ANOVA was used. For statistical analysis of Kaplan-Meier curves, the log  
477 rank (Mantel-Cox) test was used. Results are given as mean  $\pm$  SEM or mean  $\pm$  SD

478

479 **Acknowledgments:** We thank Roger Lo for M229P/R, M238P/R and M249P/R melanoma  
480 cells, Richard Neubig for UACC62 parental and resistant cell lines, Markus Bosenberg for  
481 YUMM1.7 cells and Ghanem Ghanem for short-term cultured melanoma cells. Melanoma  
482 PDX models are from the PDX facility TRACE (KULeuven, Belgium). We thank Patrick  
483 Brest and David Gilot for helpful discussions. We also thank the C3M animal room facility  
484 and the C3M imaging facility as well as the UCA GenomiX platform and the PVM  
485 Vectorology Platform.

486

487 **Funding:** This work was supported by funds from Institut National de la Santé et de la  
488 Recherche Médicale (Inserm), Centre National de la Recherche Scientifique”  
489 (CNRS), Ligue Contre le Cancer, Institut National du Cancer (INCA\_12673), ITMO  
490 Cancer Aviesan (Alliance Nationale pour les Sciences de la Vie et de la Santé,  
491 National Alliance for Life Science and Health) within the framework of the Cancer  
492 Plan (Plan Cancer 2018 « ARN non-codants en cancérologie: du fondamental au  
493 translationnel » n° 18CN045), and the French Government (National Research  
494 Agency, ANR) through the “Investments for the Future” LABEX SIGNALIFE:

495 program reference # ANR-11-LABX-0028-01 and ANR-PRCI FIBROMIR). The  
496 financial contribution of the Conseil Général 06, Canceropôle PACA and Region  
497 Provence Alpes Côte d’Azur to the C3M and IPMC is also acknowledged. S.D. was a  
498 recipient of doctoral fellowships from the LABEX SIGNALIFE and Fondation pour  
499 la Recherche Médicale. I.B. and A.C. were recipients of a doctoral fellowship from La  
500 Ligue Contre le Cancer. The PDX work was supported by FWO (#G.0929.16N) and  
501 KULeuven (C1 grant) to J-C.M.

502

503 **Author contributions:**

504 Conception and design of the work: SD, MD, BM, ST-D

505 Development of methodology: SD, AB, JF, ML, GV, MD, BM, ST-D

506 Acquisition of data: SD, AB, JF, ML, OM-B, CG, LL, CL, CM, MT, MC, AC, IB,  
507 FL, GV, J-CM

508 Analysis and interpretation of data: SD, AB, JF, MI, FL, MD, BM, ST-D

509 Writing – original draft: SD, BM, ST-D

510 Writing – review & editing: SD, CAG, GV, J-CM, MD, BM, ST-D

511 Administrative, technical or material support: MD, BM, ST-D

512 Study supervision: MD, BM, ST-D.

513 **Data and materials availability:** Expression datasets that support the findings of this study  
514 have been deposited in the Gene Expression Omnibus SuperSerie record GSE171883  
515 containing 3 distinct datasets under the following accession codes:

516 - Dataset 1: GSE171880. Effect of miR-143-3p or miR-145-5p mimics overexpression in  
517 M238P cells (microarrays).

518 - Dataset 2: GSE171881. RNA-Seq analysis of M238P stably expressing miR-143/-145  
519 cluster.

520 - Dataset 3: GSE171882. Transcriptome analysis of M238R versus M238P using nanopore  
521 long reads sequencing.

522 All other data are available in the main text or in the supplementary materials.

523

## 524 REFERENCES

- 525 1. Shain AH, Bastian BC. From melanocytes to melanomas. *Nat Rev Cancer*. 2016;16(6):345-58.
- 526 2. Flaherty KT, Hodi FS, Fisher DE. From genes to drugs: targeted strategies for melanoma. *Nat Rev*  
527 *Cancer*. 2012;12(5):349-61.
- 528 3. Cancer Genome Atlas N. Genomic Classification of Cutaneous Melanoma. *Cell*. 2015;161(7):1681-96.
- 529 4. Chapman PB, Hauschild A, Robert C, Haanen JB, Ascierto P, Larkin J, et al. Improved survival with  
530 vemurafenib in melanoma with BRAF V600E mutation. *N Engl J Med*. 2011;364(26):2507-16.
- 531 5. Robert C, Grob JJ, Stroyakovskiy D, Karaszewska B, Hauschild A, Levchenko E, et al. Five-Year  
532 Outcomes with Dabrafenib plus Trametinib in Metastatic Melanoma. *N Engl J Med*. 2019;381(7):626-36.
- 533 6. Long GV, Flaherty KT, Stroyakovskiy D, Gogas H, Levchenko E, de Braud F, et al. Dabrafenib plus  
534 trametinib versus dabrafenib monotherapy in patients with metastatic BRAF V600E/K-mutant melanoma: long-  
535 term survival and safety analysis of a phase 3 study. *Ann Oncol*. 2017;28(7):1631-9.
- 536 7. Rambow F, Marine JC, Goding CR. Melanoma plasticity and phenotypic diversity: therapeutic barriers  
537 and opportunities. *Genes Dev*. 2019;33(19-20):1295-318.
- 538 8. Marine JC, Dawson SJ, Dawson MA. Non-genetic mechanisms of therapeutic resistance in cancer. *Nat*  
539 *Rev Cancer*. 2020.
- 540 9. Tsoi J, Robert L, Paraiso K, Galvan C, Sheu KM, Lay J, et al. Multi-stage Differentiation Defines  
541 Melanoma Subtypes with Differential Vulnerability to Drug-Induced Iron-Dependent Oxidative Stress. *Cancer*  
542 *Cell*. 2018;33(5):890-904 e5.
- 543 10. Rambow F, Rogiers A, Marin-Bejar O, Aibar S, Femel J, Dewaele M, et al. Toward Minimal Residual  
544 Disease-Directed Therapy in Melanoma. *Cell*. 2018;174(4):843-55 e19.
- 545 11. Arozarena I, Wellbrock C. Phenotype plasticity as enabler of melanoma progression and therapy  
546 resistance. *Nat Rev Cancer*. 2019;19(7):377-91.
- 547 12. Sun C, Wang L, Huang S, Heynen GJ, Prahallad A, Robert C, et al. Reversible and adaptive resistance  
548 to BRAF(V600E) inhibition in melanoma. *Nature*. 2014;508(7494):118-22.
- 549 13. Villanueva J, Vultur A, Lee JT, Somasundaram R, Fukunaga-Kalabis M, Cipolla AK, et al. Acquired  
550 resistance to BRAF inhibitors mediated by a RAF kinase switch in melanoma can be overcome by cotargeting  
551 MEK and IGF-1R/PI3K. *Cancer Cell*. 2010;18(6):683-95.
- 552 14. Girotti MR, Pedersen M, Sanchez-Laorden B, Viros A, Turajlic S, Niculescu-Duvaz D, et al. Inhibiting  
553 EGF receptor or SRC family kinase signaling overcomes BRAF inhibitor resistance in melanoma. *Cancer*  
554 *Discov*. 2013;3(2):158-67.
- 555 15. Muller J, Krijgsman O, Tsoi J, Robert L, Hugo W, Song C, et al. Low MITF/AXL ratio predicts early  
556 resistance to multiple targeted drugs in melanoma. *Nat Commun*. 2014;5:5712.



- 557 16. Fallahi-Sichani M, Becker V, Izar B, Baker GJ, Lin JR, Boswell SA, et al. Adaptive resistance of  
558 melanoma cells to RAF inhibition via reversible induction of a slowly dividing de-differentiated state. *Mol Syst*  
559 *Biol.* 2017;13(1):905.
- 560 17. Nazarian R, Shi H, Wang Q, Kong X, Koya RC, Lee H, et al. Melanomas acquire resistance to B-  
561 RAF(V600E) inhibition by RTK or N-RAS upregulation. *Nature.* 2010;468(7326):973-7.
- 562 18. Rathore M, Girard C, Ohanna M, Tichet M, Ben Jouira R, Garcia E, et al. Cancer cell-derived long  
563 pentraxin 3 (PTX3) promotes melanoma migration through a toll-like receptor 4 (TLR4)/NF-kappaB signaling  
564 pathway. *Oncogene.* 2019;38(30):5873-89.
- 565 19. Titz B, Lomova A, Le A, Hugo W, Kong X, Ten Hoeve J, et al. JUN dependency in distinct early and  
566 late BRAF inhibition adaptation states of melanoma. *Cell Discov.* 2016;2:16028.
- 567 20. Fedorenko IV, Abel EV, Koomen JM, Fang B, Wood ER, Chen YA, et al. Fibronectin induction  
568 abrogates the BRAF inhibitor response of BRAF V600E/PTEN-null melanoma cells. *Oncogene.*  
569 2016;35(10):1225-35.
- 570 21. Marusak C, Thakur V, Li Y, Freitas JT, Zmina PM, Thakur VS, et al. Targeting Extracellular Matrix  
571 Remodeling Restores BRAF Inhibitor Sensitivity in BRAFi-resistant Melanoma. *Clin Cancer Res.*  
572 2020;26(22):6039-50.
- 573 22. Girard CA, Lecacheur M, Ben Jouira R, Berestjuk I, Diazzi S, Prod'homme V, et al. A feed-forward  
574 mechanosignaling loop confers resistance to therapies targeting the MAPK pathway in BRAF-mutant  
575 melanoma. *Cancer Res.* 2020.
- 576 23. Diazzi S, Tartare-Deckert S, Deckert M. Bad Neighborhood: Fibrotic Stroma as a New Player in  
577 Melanoma Resistance to Targeted Therapies. *Cancers (Basel).* 2020;12(6).
- 578 24. Meeth K, Wang JX, Micevic G, Damsky W, Bosenberg MW. The YUMM lines: a series of congenic  
579 mouse melanoma cell lines with defined genetic alterations. *Pigment Cell Melanoma Res.* 2016;29(5):590-7.
- 580 25. Pottier N, Cauffiez C, Perrais M, Barbry P, Mari B. FibromiRs: translating molecular discoveries into  
581 new anti-fibrotic drugs. *Trends Pharmacol Sci.* 2014;35(3):119-26.
- 582 26. Savary G, Dewaeles E, Diazzi S, Buscot M, Nottet N, Fassy J, et al. The Long Noncoding RNA  
583 DNM3OS Is a Reservoir of FibromiRs with Major Functions in Lung Fibroblast Response to TGF-beta and  
584 Pulmonary Fibrosis. *Am J Respir Crit Care Med.* 2019;200(2):184-98.
- 585 27. Hanna J, Hossain GS, Kocerha J. The Potential for microRNA Therapeutics and Clinical Research.  
586 *Front Genet.* 2019;10:478.
- 587 28. Ishida M, Selaru FM. miRNA-Based Therapeutic Strategies. *Curr Anesthesiol Rep.* 2013;1(1):63-70.
- 588 29. Misek SA, Appleton KM, Dexheimer TS, Lisabeth EM, Lo RS, Larsen SD, et al. Rho-mediated  
589 signaling promotes BRAF inhibitor resistance in de-differentiated melanoma cells. *Oncogene.* 2020;39(7):1466-  
590 83.
- 591 30. Marin-Bejar O, Rogiers A, Dewaele M, Femel J, Karras P, Pozniak J, et al. A neural crest stem cell-  
592 like state drives nongenetic resistance to targeted therapy in melanoma. *bioRxiv.* 2020:2020.12.15.422929.
- 593 31. Le Brigand K, Robbe-Sermesant K, Mari B, Barbry P. MiRonTop: mining microRNAs targets across  
594 large scale gene expression studies. *Bioinformatics.* 2010;26(24):3131-2.
- 595 32. Ma Y, Machesky LM. Fascin1 in carcinomas: Its regulation and prognostic value. *Int J Cancer.*  
596 2015;137(11):2534-44.
- 597 33. Kim MH, Kim J, Hong H, Lee SH, Lee JK, Jung E, et al. Actin remodeling confers BRAF inhibitor  
598 resistance to melanoma cells through YAP/TAZ activation. *EMBO J.* 2016;35(5):462-78.
- 599 34. Bonella F, Stowasser S, Wollin L. Idiopathic pulmonary fibrosis: current treatment options and critical  
600 appraisal of nintedanib. *Drug Des Devel Ther.* 2015;9:6407-19.
- 601 35. Wollin L, Wex E, Pautsch A, Schnapp G, Hostettler KE, Stowasser S, et al. Mode of action of  
602 nintedanib in the treatment of idiopathic pulmonary fibrosis. *Eur Respir J.* 2015;45(5):1434-45.
- 603 36. Kent OA, Fox-Talbot K, Halushka MK. RREB1 repressed miR-143/145 modulates KRAS signaling  
604 through downregulation of multiple targets. *Oncogene.* 2013;32(20):2576-85.
- 605 37. Yang S, Cui H, Xie N, Icyuz M, Banerjee S, Antony VB, et al. miR-145 regulates myofibroblast  
606 differentiation and lung fibrosis. *FASEB J.* 2013;27(6):2382-91.
- 607 38. Long X, Miano JM. Transforming growth factor-beta1 (TGF-beta1) utilizes distinct pathways for the  
608 transcriptional activation of microRNA 143/145 in human coronary artery smooth muscle cells. *J Biol Chem.*  
609 2011;286(34):30119-29.
- 610 39. Kuwano K. PTEN as a new agent in the fight against fibrogenesis. *Am J Respir Crit Care Med.*  
611 2006;173(1):5-6.
- 612 40. Poli V, Secli L, Avalle L. The Microrna-143/145 Cluster in Tumors: A Matter of Where and When.  
613 *Cancers (Basel).* 2020;12(3).

- 614 41. Das AV, Pillai RM. Implications of miR cluster 143/145 as universal anti-oncomiRs and their  
615 dysregulation during tumorigenesis. *Cancer Cell Int.* 2015;15:92.
- 616 42. Kent OA, McCall MN, Cornish TC, Halushka MK. Lessons from miR-143/145: the importance of cell-  
617 type localization of miRNAs. *Nucleic Acids Res.* 2014;42(12):7528-38.
- 618 43. McCall MN, Kim MS, Adil M, Patil AH, Lu Y, Mitchell CJ, et al. Toward the human cellular  
619 microRNAome. *Genome Res.* 2017;27(10):1769-81.
- 620 44. Liu R, Liao J, Yang M, Sheng J, Yang H, Wang Y, et al. The cluster of miR-143 and miR-145 affects  
621 the risk for esophageal squamous cell carcinoma through co-regulating fascin homolog 1. *PLoS One.*  
622 2012;7(3):e33987.
- 623 45. Kano M, Seki N, Kikkawa N, Fujimura L, Hoshino I, Akutsu Y, et al. miR-145, miR-133a and miR-  
624 133b: Tumor-suppressive miRNAs target FSCN1 in esophageal squamous cell carcinoma. *Int J Cancer.*  
625 2010;127(12):2804-14.
- 626 46. Scott KL, Nogueira C, Heffernan TP, van Doorn R, Dhakal S, Hanna JA, et al. Proinvasion metastasis  
627 drivers in early-stage melanoma are oncogenes. *Cancer Cell.* 2011;20(1):92-103.
- 628 47. Ma Y, Li A, Faller WJ, Libertini S, Fiorito F, Gillespie DA, et al. Fascin 1 is transiently expressed in  
629 mouse melanoblasts during development and promotes migration and proliferation. *Development.*  
630 2013;140(10):2203-11.
- 631 48. Dynoodt P, Speeckaert R, De Wever O, Chevolet I, Brochez L, Lambert J, et al. miR-145  
632 overexpression suppresses the migration and invasion of metastatic melanoma cells. *Int J Oncol.*  
633 2013;42(4):1443-51.
- 634 49. Dynoodt P, Mestdagh P, Van Peer G, Vandesompele J, Goossens K, Peelman LJ, et al. Identification of  
635 miR-145 as a key regulator of the pigmentary process. *J Invest Dermatol.* 2013;133(1):201-9.
- 636 50. Hirata E, Girotti MR, Viros A, Hooper S, Spencer-Dene B, Matsuda M, et al. Intravital imaging reveals  
637 how BRAF inhibition generates drug-tolerant microenvironments with high integrin beta1/FAK signaling.  
638 *Cancer Cell.* 2015;27(4):574-88.
- 639 51. Fedorenko IV, Wargo JA, Flaherty KT, Messina JL, Smalley KSM. BRAF Inhibition Generates a  
640 Host-Tumor Niche that Mediates Therapeutic Escape. *J Invest Dermatol.* 2015;135(12):3115-24.
- 641 52. Orgaz JL, Crosas-Molist E, Sadok A, Perdrix-Rosell A, Maiques O, Rodriguez-Hernandez I, et al.  
642 Myosin II Reactivation and Cytoskeletal Remodeling as a Hallmark and a Vulnerability in Melanoma Therapy  
643 Resistance. *Cancer Cell.* 2020;37(1):85-103 e9.
- 644 53. Cordes KR, Sheehy NT, White MP, Berry EC, Morton SU, Muth AN, et al. miR-145 and miR-143  
645 regulate smooth muscle cell fate and plasticity. *Nature.* 2009;460(7256):705-10.
- 646 54. Xin M, Small EM, Sutherland LB, Qi X, McAnally J, Plato CF, et al. MicroRNAs miR-143 and miR-  
647 145 modulate cytoskeletal dynamics and responsiveness of smooth muscle cells to injury. *Genes Dev.*  
648 2009;23(18):2166-78.
- 649 55. Boyle GM, Woods SL, Bonazzi VF, Stark MS, Hacker E, Aoude LG, et al. Melanoma cell  
650 invasiveness is regulated by miR-211 suppression of the BRN2 transcription factor. *Pigment Cell Melanoma*  
651 *Res.* 2011;24(3):525-37.
- 652 56. Li K, Tang M, Tong S, Wang C, Sun Q, Lv M, et al. BRAFi induced demethylation of miR-152-5p  
653 regulates phenotype switching by targeting TXNIP in cutaneous melanoma. *Apoptosis.* 2020;25(3-4):179-91.

654

655

656 **FIGURE LEGENDS**

657 **Fig. 1. Nintedanib/BIBF1120 prevents MAPKi-induced ECM remodeling, decreases resistance**  
658 **to targeted therapy and delays tumor relapse. (A-G)** Mouse YUMM1.7 melanoma cells were  
659 subcutaneously inoculated into C57BL/6 mice and when tumors reached 100 mm<sup>3</sup> mice were treated  
660 with vehicle (Ctrl), BIBF1120 (BIBF), MAPK-targeted therapies (BRAFi, Vemurafenib + MEKi,  
661 Trametinib) or MAPK-targeted therapies plus BIBF. **(B)** Representative median graphics showing  
662 tumor growth following treatment. Two-way ANOVA was used for statistical analysis. \*\* P≤0.01.  
663 **(C)** Kaplan-Meier survival curves of mice treated with the indicated therapies. Log rank (Mantel-Cox)  
664 statistical test was used for MAPK-targeted therapies vs MAPK-targeted therapies/BIBF1120.  
665 \*\*\*\*P≤0.0001. **(D)** Mouse body weight was measured at the indicated times. Data shown are  
666 mean±SD (n=6). **(E-F)** Tumor sections were stained with picrosirius red and imaged under polarized  
667 light. **(E)** Quantification of collagen fibers thickness. **(F)** Representative image of collagen fibers  
668 network in tumors from mice under the different treatments. Scale bar 100 μM. **(G)** Heatmap showing  
669 the differential expression of ECM and myofibroblast/CAF genes in mice treated with MAPK-  
670 targeted therapies with or without BIBF compared to control mice (log<sub>2</sub> ratio, n=5). **(H)** Heatmap and  
671 Western Blot showing the expression of ECM, myofibroblast/CAF and phenotype switch markers in  
672 human M238R cells compared to the parental M238P cells. Heatmap represents the mean of  
673 expression of 3 independent experiments by RT-qPCR. **(I)** Heatmap showing the expression of ECM,  
674 myofibroblast/CAF and phenotype switch markers in human M238R cells treated with BIBF1120  
675 (BIBF) (2 μM, 72 h) or vehicle alone by RT-qPCR (n=3). **(J)** Crystal violet viability assay of M238R  
676 cells treated with BRAFi (Vemurafenib, 3 μM), BIBF1120 (BIBF, 2 μM) or with BRAFi (3 μM) plus  
677 BIBF (2 μM) for 72 h. Paired Student t-test was used for statistical analysis. \*\*\*\*P≤0.0001. Data is  
678 represented as mean ± SD from a triplicate representative of 3 independent experiments.

679 **Fig. 2. Expression of miR-143/-145 is correlated with the undifferentiated mesenchymal-like**  
680 **MAPKi-resistant phenotype and is negatively regulated by Nintedanib/BIBF1120. (A)** Heatmap  
681 showing the differential expression of a selection of miRNAs known as “FibromiRs” in human

682 BRAF<sup>V600E</sup> mutant melanoma cells sensitive to MAPK-targeted therapies (M229, M238, M249) and  
683 the corresponding BRAFi-resistant cells. The type of resistance for each cell line is indicated.  
684 Expression was evaluated by RT-qPCR; log<sub>2</sub> (R/P) is indicated for each cell line. **(B)** Relative  
685 miRNA expression levels was quantified in M238P cells treated for 72 h with BIBF1120 (BIBF, 2  
686 μM), MAPK-targeted therapies (BRAFi, Vemurafenib + MEKi, Trametinib) (1 μM), or with MAPK-  
687 targeted therapies (1 μM) plus BIBF (2 μM) by RT-qPCR and normalized to miR-16-5p. Data is  
688 represented as mean ± SEM from a triplicate representative of 3 independent experiments. One-way  
689 Anova was used for statistical analysis. \*\*P≤0.01, \*\*\*P≤0.001. **(C)** Expression of miR-143-3p and  
690 miR-145-5p in control mice and mice treated with the indicated therapies (see legend of Fig.1 for  
691 details) was quantified by RT-qPCR. One-way Anova was used for statistical analysis. \*P≤0.05,  
692 \*\*\*\*P≤0.0001. **(D)** Relative miRNA expression levels was quantified in M238P cells stimulated for  
693 48h with TGF-β (10 ng/mL) or PDGF-BB (20 ng/mL) by RT-qPCR and normalized to miR-16-5p.  
694 Data is represented as mean ± SEM from a triplicate representative of 3 independent experiments. P-  
695 values were calculated using Paired Student t-test. \*P≤0.05, \*\*\*P≤0.001. **(E)** Relative miRNA  
696 expression levels was quantified in M238R cells treated for 48 h with the triple kinase inhibitor  
697 Nintedanib/BIBF1120 (BIBF, 2 μM), the TGF-β receptor kinase inhibitor SB431542 (SB, 10 μM),  
698 and the pan-AKT inhibitor GSK690693 (GSK, 10 μM) by RT-qPCR. Data is represented as mean ±  
699 SEM from a triplicate representative of 3 independent experiments. P-values were calculated using  
700 Paired Student t-test. \*P≤0.05, \*\*P≤0.01; \*\*\*P≤0.001. **(F, G)** Phenotype switch/invasive/ECM  
701 markers **(F)** and relative miRNAs expression levels **(G)** were quantified in therapy-naïve (N) and  
702 resistant (R) PDX samples. The log<sub>2</sub> fold change or the ratio of the fold change R vs N is shown for  
703 each couple of samples.

704 **Fig. 3. miR-143/-145 cluster promotes ECM reprogramming, melanoma cell dedifferentiation**  
705 **and drug resistance.** **(A)** Heatmap showing the differential expression of a selection of ECM-related  
706 genes, cytoskeleton and myofibroblast markers in 3 distinct cell lines (M238P, UACC62P, M229P)  
707 transfected with the indicated mimics (control (miR-neg), miR-143 or miR-145 mimics, 72 h, 30 nM),

708 assessed by RT-qPCR. (n=3) **(B)** M238P cells were treated 72 h with BRAFi (Vemurafenib, 1  $\mu$ M, 72  
709 h) in the presence or the absence of LNA-based anti-miR-143 (LNA-143) or anti-miR-145 (LNA-145)  
710 (50 nM, 72 h). ECM markers RT-qPCR data is represented as mean  $\pm$  SD from a triplicate  
711 representative of at least 3 independent experiments. One-way Anova was used for statistical analysis.  
712 \* $P \leq 0.05$ , \*\* $P \leq 0.01$ , \*\*\* $P \leq 0.001$ , \*\*\*\* $P \leq 0.0001$ . **(C)** ImmunoBlot analysis of ECM remodeling  
713 markers on total cell lysates from parental cells (M238P) transfected as in **(A)**. **(D)** ImmunoBlot  
714 analysis of ECM remodeling markers of cells treated with the indicated combination of inhibitors. **(E)**  
715 Proliferation curves using time-lapse analysis of cells with the IncuCyte system. Graph shows  
716 quantification of cell confluence. 2-way ANOVA analysis was used for statistical analysis.  
717 \*\*\*\* $P \leq 0.0001$ . **(F)** Migration assay performed in Boyden chambers. Representative images showing  
718 migrating cells in the different conditions. The histogram represents the quantitative determination of  
719 data obtained using ImageJ software. Paired Student t-test was used for statistical analysis. \*  $P \leq 0.05$   
720 \*\*\* $P \leq 0.001$ . **(G)** ImmunoBlot analysis of phenotype switch markers on lysates from cells treated as  
721 in **(A)**. **(H)** Crystal violet viability assay of M238P cells treated with the different combinations of  
722 inhibitors. Data is represented as mean  $\pm$  SD from a triplicate representative of at least 3 independent  
723 experiments. One-way ANOVA was used for statistical analysis. \*\*\*\* $P \leq 0.0001$ .

724 **Fig. 4. Identification of gene targets and cellular pathways functionally associated with the miR-**  
725 **143/-145 cluster-mediated undifferentiated/mesenchymal-like melanoma cell phenotype. (A-C)**  
726 M238P cells were transfected separately with miR-143-3p, miR-145-5p or a negative control (miR-  
727 neg) mimics and RNA content was analyzed using whole genome microarrays (dataset 1, n=2). **(A)**  
728 Heatmap showing the genes differentially expressed after individual miRNA mimic overexpression.  
729 **(B)** Overrepresentation of miRNA predicted targets in the set of downregulated transcripts following  
730 miR-143-3p and miR-145-5p mimics transfection using miRonTop webtool. Each arrow indicates the  
731 corresponding overexpressed miRNA. **(C)** Venn diagram showing the selection of the best target  
732 candidates (red boxes) using miR-143-3p and miR-145-5p mimics transfection as well as comparison  
733 of M238R and M238P transcriptomic profiles. **(D-E)** M238P cells were transduced with a miR-143/-

734 145 construct and selected for stable expression of the cluster or transduced with a control vector,  
735 followed by RNA-seq analysis (dataset 2, n=2). **(D)** Heatmap highlighting the common predicted  
736 upstream regulators altered in cells stably expressing the miR-143/-145 cluster and M238R cells  
737 compared to control M238P cells. A subset of common regulators (out of the top 50 scores)  
738 corresponding to transcription factors (TFs), cytokines and growth factors (GFs), transmembrane  
739 receptors, kinases and phosphatases is shown. Red arrows indicate annotations related to the TGF- $\beta$   
740 pathway. **(E)** Venn diagram summarizing the comparison of the best-predicted targets following the 2  
741 gain-of-function approaches. Subsets of miR-143-3p and miR-145-5p predicted targets downregulated  
742 by both mimics and stable lentivirus expression are shown (red boxes). **(F)** Luciferase assay in HEK  
743 cells overexpressing miR-143 or miR-145 transfected with a plasmid harboring the WT or muted  
744 sequence of the miR-143 and miR-145 binding sites present in FSCN1 3'UTR. Each bar represents  
745 the mean  $\pm$  SE of experiments performed at least in triplicate. \*\*\* $P \leq 0.001$  \*\*\*\* $P \leq 0.0001$ . P-values  
746 were calculated using Paired Student t-test. **(G)** RT-qPCR analysis of FSCN1 expression in parental  
747 cells (M238P) transfected with the indicated mimics. Data is represented as mean  $\pm$  SE from a  
748 triplicate representative of at least 3 independent experiments. Paired Student t-test was used for  
749 statistical analysis. \*\*  $P \leq 0.01$  \*\*\* $P \leq 0.001$ . **(H)** Western Blot analysis of FSCN1 expression in  
750 parental cells (M238P) transfected with the indicated mimics.

751 **Fig. 5. FSCN1 is a functional miR-143/-145 target contributing to the phenotypic switch towards**  
752 **the undifferentiated/mesenchymal-like state. (A)** qPCR analysis of FSCN1, miR-143 and miR-145  
753 expression in a 1205Lu xenograft nude mice model treated with the BRAFi Vemurafenib compared to  
754 control mice. Paired Student t-test has been used for statistical analysis. \*\* $P \leq 0.01$ , \*\*\* $P \leq 0.001$ . **(B)**  
755 FSCN1 immunofluorescent staining and quantification of fluorescence intensity in cells (M238P)  
756 treated with the different combinations of inhibitors. Mann-Whitney U test has been used for  
757 statistical analysis. \*\*\* $P \leq 0.001$ , \*\*\*\* $P \leq 0.0001$ . Scale bar 40  $\mu$ M. **(C-E)** M238P cells were  
758 transfected with two different sequences of siRNAs vs FSCN1 or with a control siRNA (72 h, 100  
759 nM). **(C)** ImmunoBlot analysis of cell cycle markers on cell lysates from M238P cells cultured for 72

760 h following transfection with the different siRNAs. **(D)** Migration assay performed in Boyden  
761 chambers. Representative images showing migration of M238P cells treated with the indicated  
762 siRNAs. The histogram represents the quantitative determination of data obtained using ImageJ  
763 software. Paired Student t-test was used for statistical analysis. \* $P \leq 0.05$ , \*\*\* $P \leq 0.001$  **(E)** ImmunoBlot  
764 analysis of phenotype-switch markers on cell lysates from M238P cells transfected with the indicated  
765 siRNAs. **(F-H)** BRAFi-resistant M238R cells overexpressing FSCN1 were obtained after transduction  
766 with a FSCN1 lentiviral construct. M238R transduced with a Ctrl lentivirus were used as control. **(F)**  
767 Effect of FSCN1 overexpression on cell proliferation assessed by time-lapse analysis using the  
768 IncuCyte system. Graph shows quantification of cell confluence. 2-way ANOVA analysis was used  
769 for statistical analysis. \*\*\*\* $P \leq 0.0001$ . **(G)** ImmunoBlot analysis of FSCN1, phenotype-switch  
770 markers and ECM remodeling markers on cell lysates from control and FSCN1 overexpressing cells.  
771 **(H)** Crystal violet viability assay of M238R cells stably overexpressing FSCN1 treated with the  
772 BRAFi Vemurafenib. (6 days, Vemurafenib (Vemu) 5, 10, 20 or 30  $\mu\text{M}$ ). Paired Student t-test was  
773 used for statistical analysis. Data is represented as mean  $\pm$  SD from a triplicate representative of at  
774 least 3 independent experiments. \*\*\*\* $P \leq 0.0001$ .

775 **Fig. 6. Regulation of actin cytoskeleton dynamics and focal adhesions by miR-143/-145 cluster**  
776 **/FSCN1 axis.** **(A-B)** M238P cells were transfected with miR-143-3p, miR-145-5p or a control mimic  
777 (miR-neg) (72 h, 30 nM). **(A)** Quantification of cell area in cells stained for F-actin (red) and nuclei  
778 (blue). Data is represented as scatter plot with mean  $\pm$  SD ( $n \geq 30$  cells per condition). Mann-Whitney  
779 U test was used for statistical analysis. \*\*\*\* $P \leq 0.0001$ . Scale bar 40  $\mu\text{M}$ . **(B)** Quantification of focal  
780 adhesions number in cells stained for pPaxillin (green) and nuclei (blue). Focal adhesions number is  
781 represented as mean  $\pm$  SD ( $n \geq 30$  cells per condition). Each point represents the average number of  
782 focal adhesions per cell calculated for each field. Paired Student t-test has been used for statistical  
783 analysis. \* $P \leq 0.01$  \*\*\* $P \leq 0.001$ . FA, focal adhesion. Scale bar 40  $\mu\text{M}$ . **(C-D)** M238P cells were  
784 transfected with two different sequences of siRNAs vs FSCN1 or with a control siRNA (72 h, 100  
785 nM). **(C)** Quantification of cell area in cells stained for F-actin (red) and nuclei (blue). Data is

786 represented as scatter plot with mean  $\pm$  SD ( $n \geq 30$  cells per condition). Mann-Whitney U test was used  
787 for statistical analysis. \*\*\*\* $P \leq 0.0001$ . Scale bar 40  $\mu$ M. **(D)** Quantification of focal adhesions number  
788 in cells stained for pPaxillin (green) and nuclei (blue). Focal adhesions number is represented as mean  
789  $\pm$  SD ( $n \geq 30$  cells per condition). Each point represents the average number of focal adhesions per cell  
790 calculated for each field. Paired Student t-test has been used for statistical analysis. \*\*\*\* $P \leq 0.0001$ .  
791 FA, focal adhesion. Scale bar 40  $\mu$ M.

792 **Fig. 7. Regulation of mechanosensitive transcriptional coactivators YAP and MRTF by the**  
793 **miR-143/-145 cluster /FSCN1 axis.** **(A-C)** M238P cells were transfected with miR-143-3p, miR-  
794 145-5p or a control mimic (miR-neg) (72 h, 30 nM). **(A-B)** Effect of miR-143-3p or miR-145-5p  
795 overexpression on YAP **(A)** and MRTFA **(B)** nuclear translocation by immunofluorescence. Data are  
796 represented as scatter plot with mean  $\pm$  SD ( $n \geq 30$  cells per condition). Mann-Whitney U test was used  
797 for statistical analysis. \*\*\*\* $P \leq 0.0001$ . Scale bar 40  $\mu$ M. **(C)** Effect of miR-143-3p or miR-145-5p  
798 overexpression on the expression of YAP/MRTF target genes assessed by RT-qPCR. Data are  
799 normalized to the expression in control cells. Data is represented as mean  $\pm$  SD from a triplicate  
800 representative of at least 3 independent experiments. Paired Student t-test was used for statistical  
801 analysis. \* $P \leq 0.05$ , \*\* $P \leq 0.01$ , \*\*\*\* $P \leq 0.0001$ . **(D-F)** M238P cells were transfected with two different  
802 sequences of siRNAs vs FSCN1 or with a control siRNA (72 h, 100 nM). **(D-E)** Effect of FSCN1  
803 downregulation on MRTFA **(D)** and YAP1 **(E)** nuclear translocation assessed by immunofluorescence  
804 in M238P. Data are represented as scatter plot with mean  $\pm$  SD ( $n \geq 30$  cells per condition). Mann-  
805 Whitney U test was used for statistical analysis. \*\*\* $P \leq 0.001$ , \*\*\*\* $P \leq 0.0001$ . Scale bar 40  $\mu$ M. **(F)**  
806 RT-qPCR analysis for the expression of MRTFA/YAP target genes in cells (M238P) transfected with  
807 the indicated siRNAs. Data are normalized to the expression in parental cells. Data is represented as  
808 mean  $\pm$  SE from a triplicate representative of at least 3 independent experiments. Paired Student t-test  
809 has been used for statistical analysis. \* $P \leq 0.05$ , \*\* $P \leq 0.01$ , \*\*\* $P \leq 0.001$ . Scale bar 40  $\mu$ M.



810 **Fig. 8 Proposed model for a role of the pro-fibrotic miR-143/-145 cluster in phenotypic**  
811 **plasticity-driven resistance induced by MAPK-targeted therapies and its potential targeting by**  
812 **Nintedanib.** Created with [BioRender.com](https://BioRender.com)

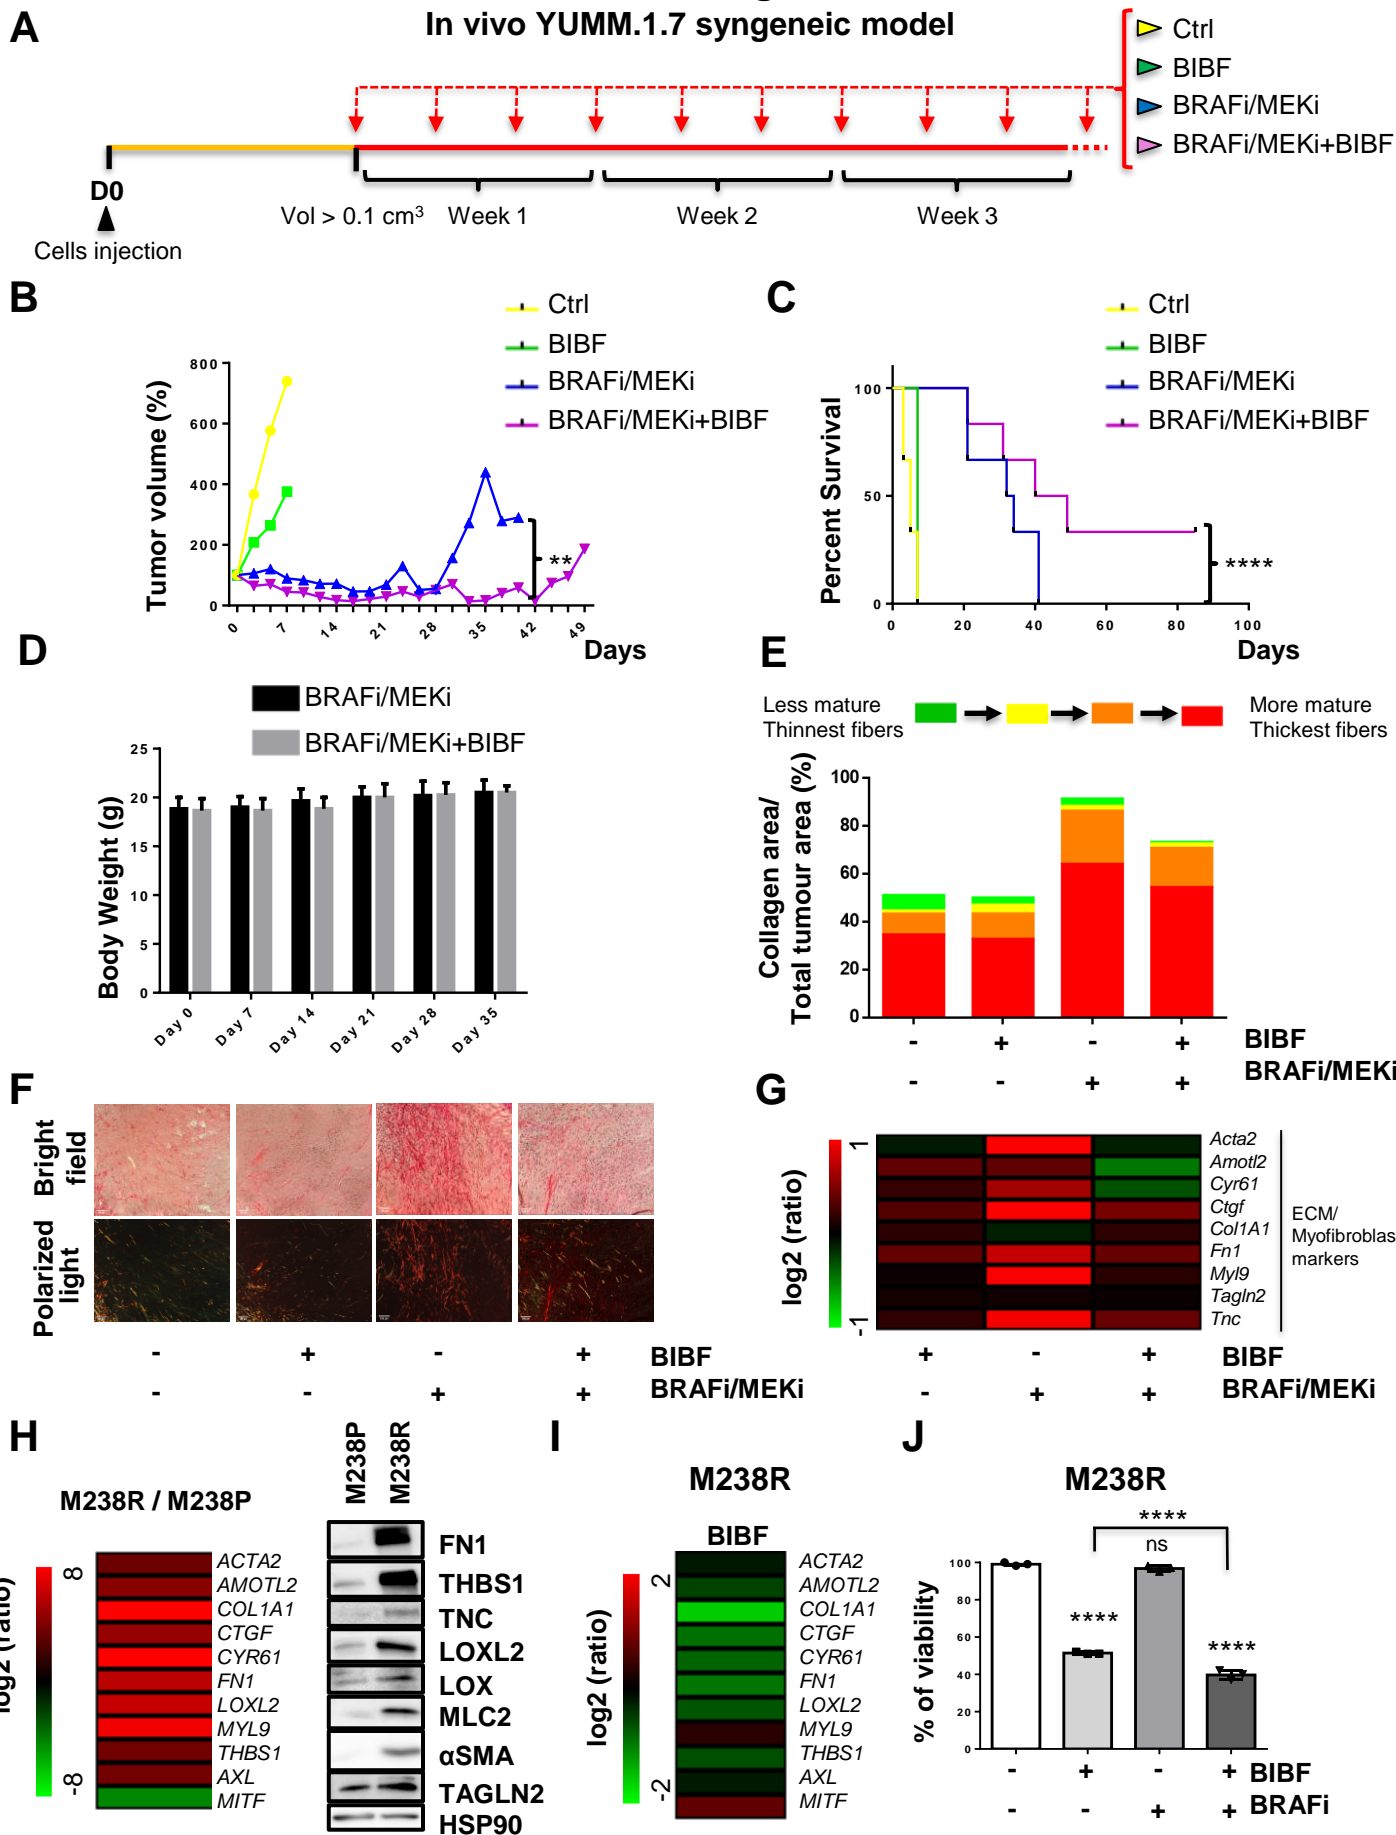

**A**

Resistant vs Parental cell lines

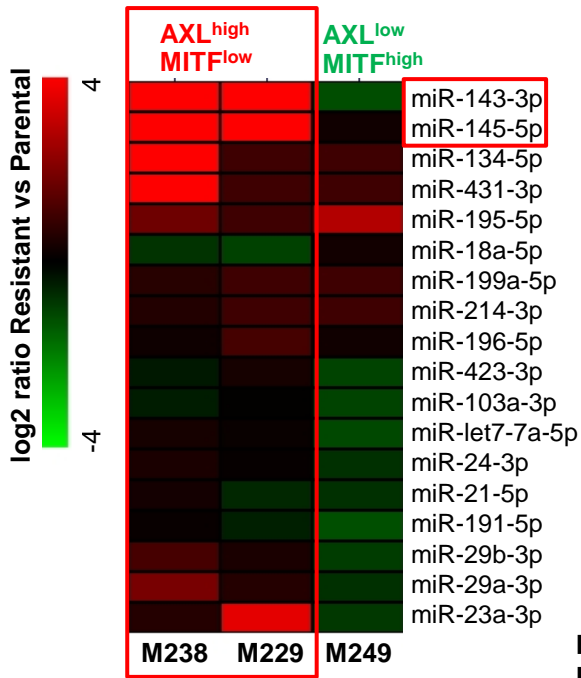

**B**

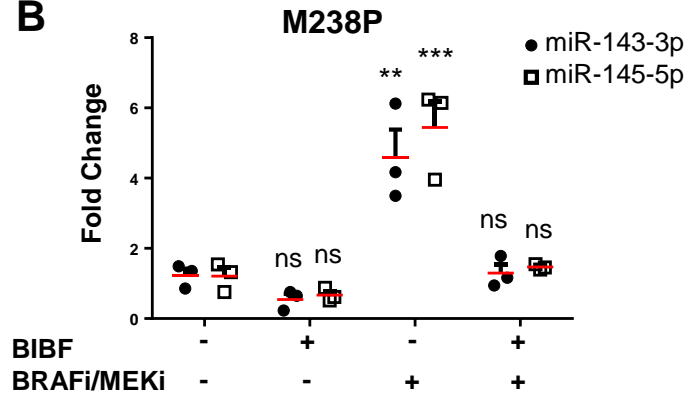

**C**

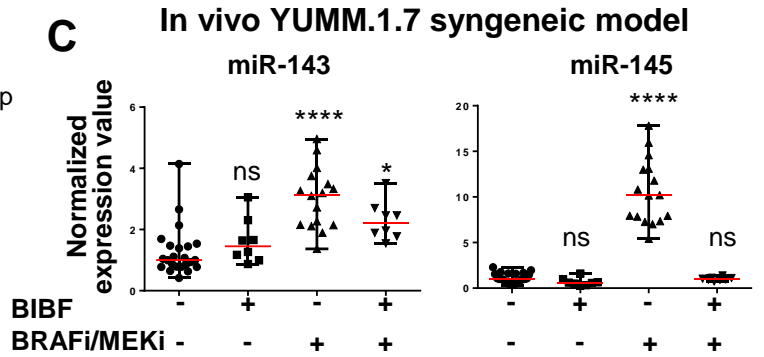

**D**

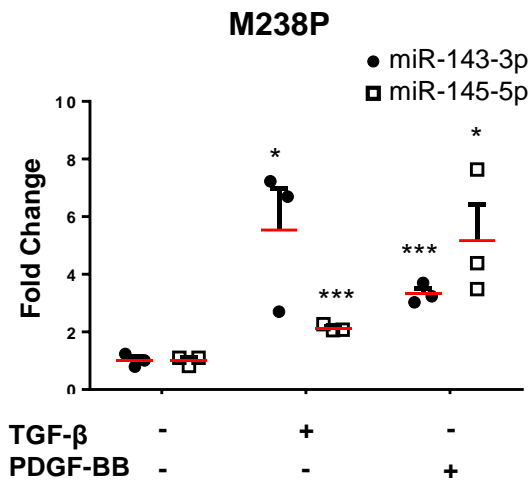

**E**

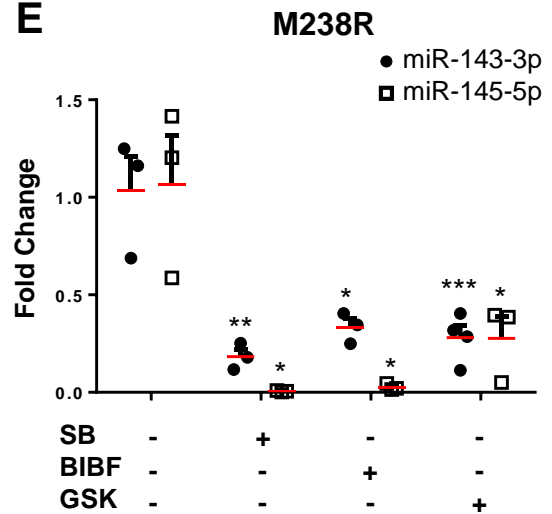

**F**

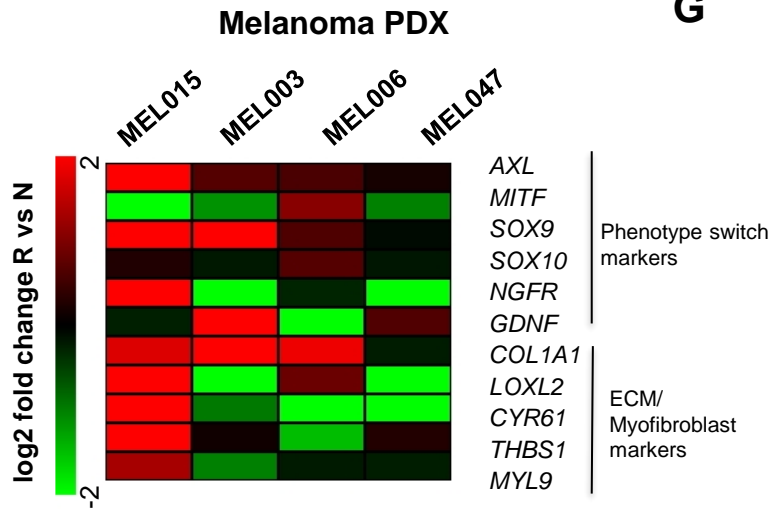

**G**

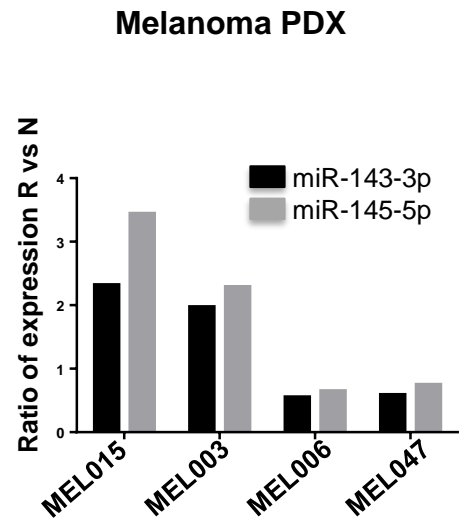

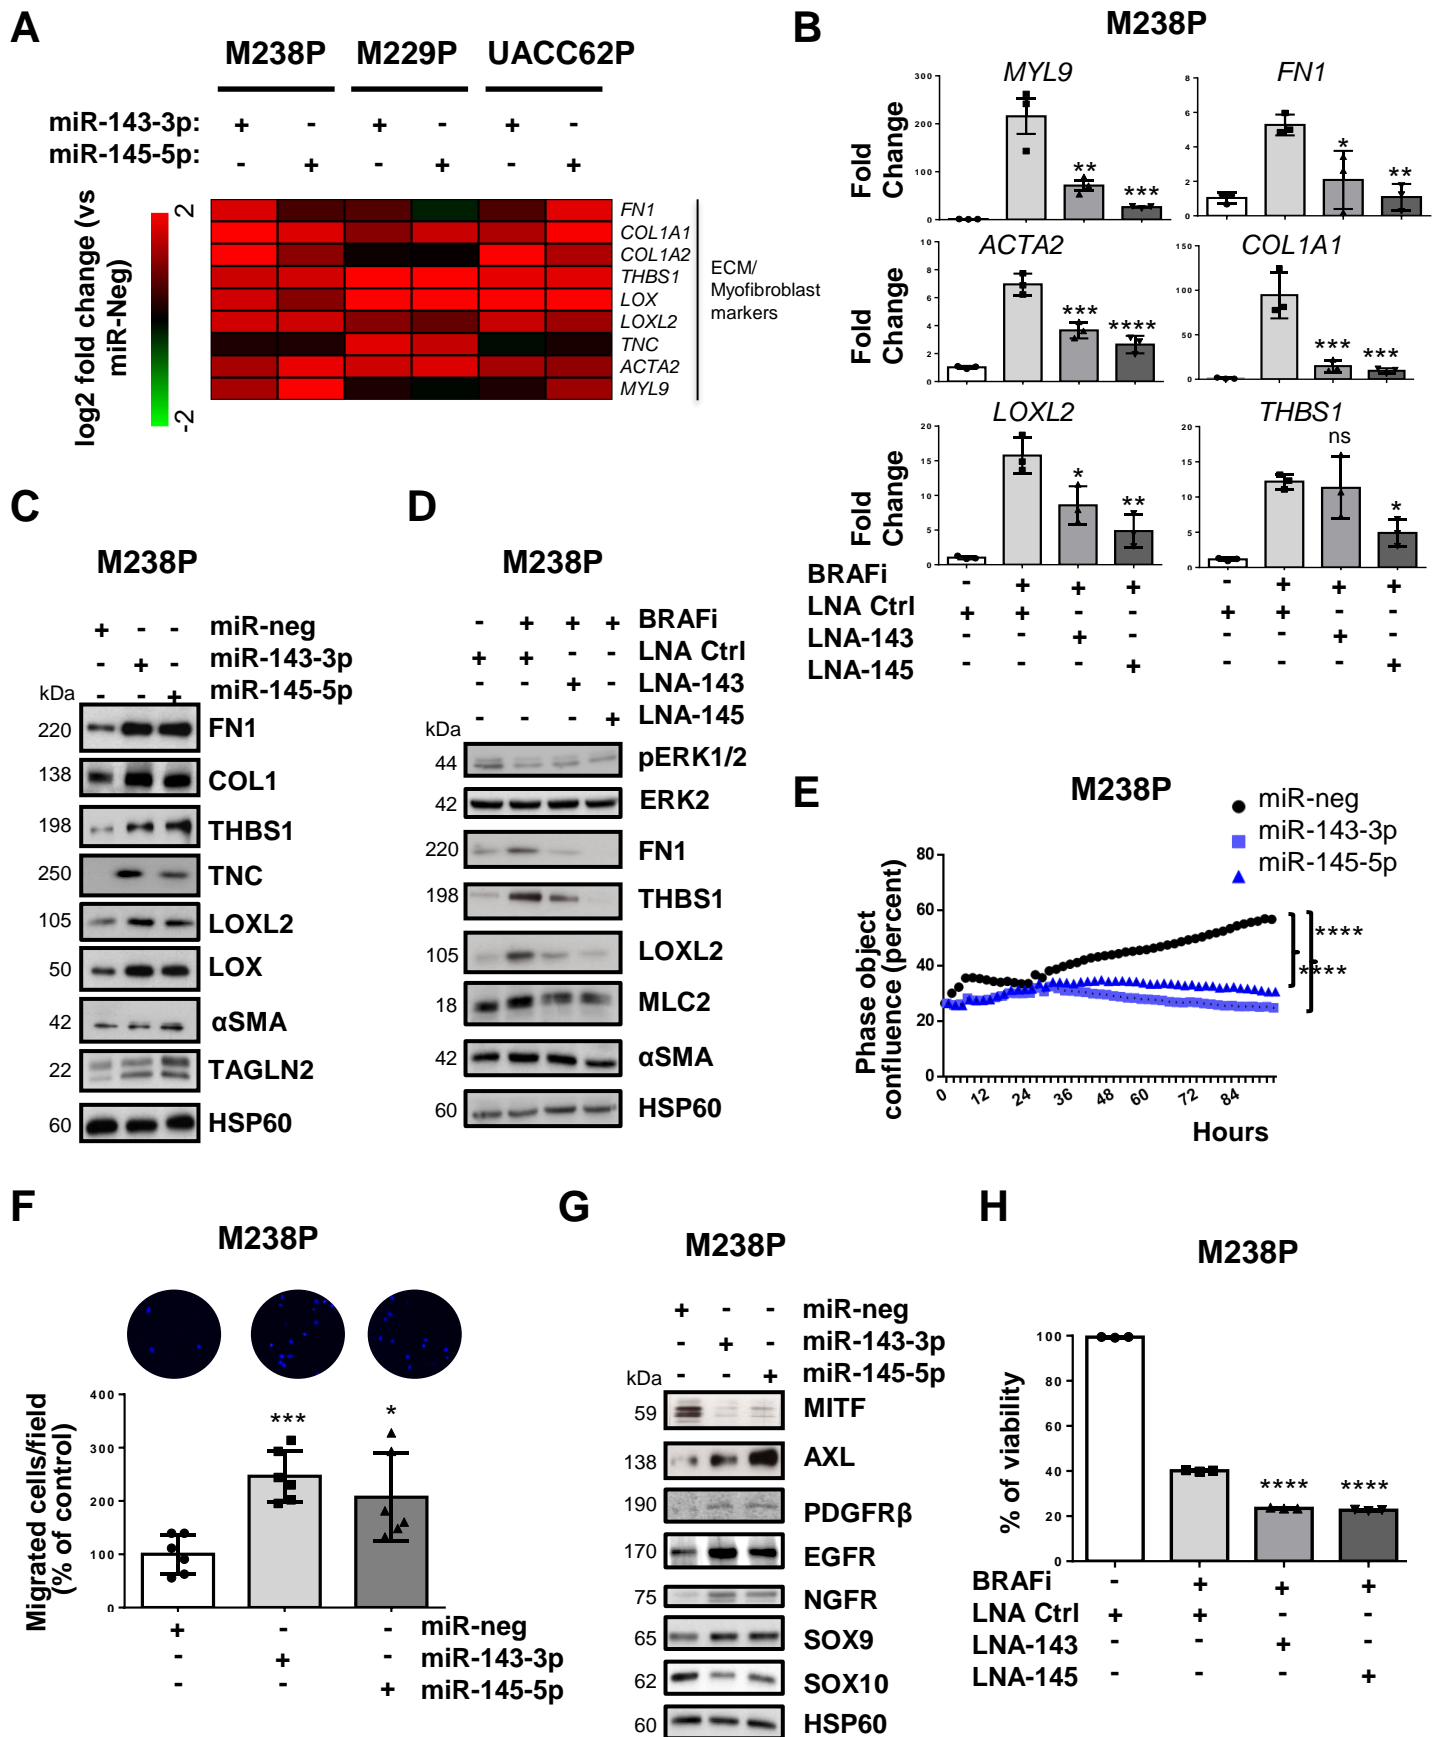

**Diazzi et al. Fig. 4**  
**Gain-of-function (mimics)**

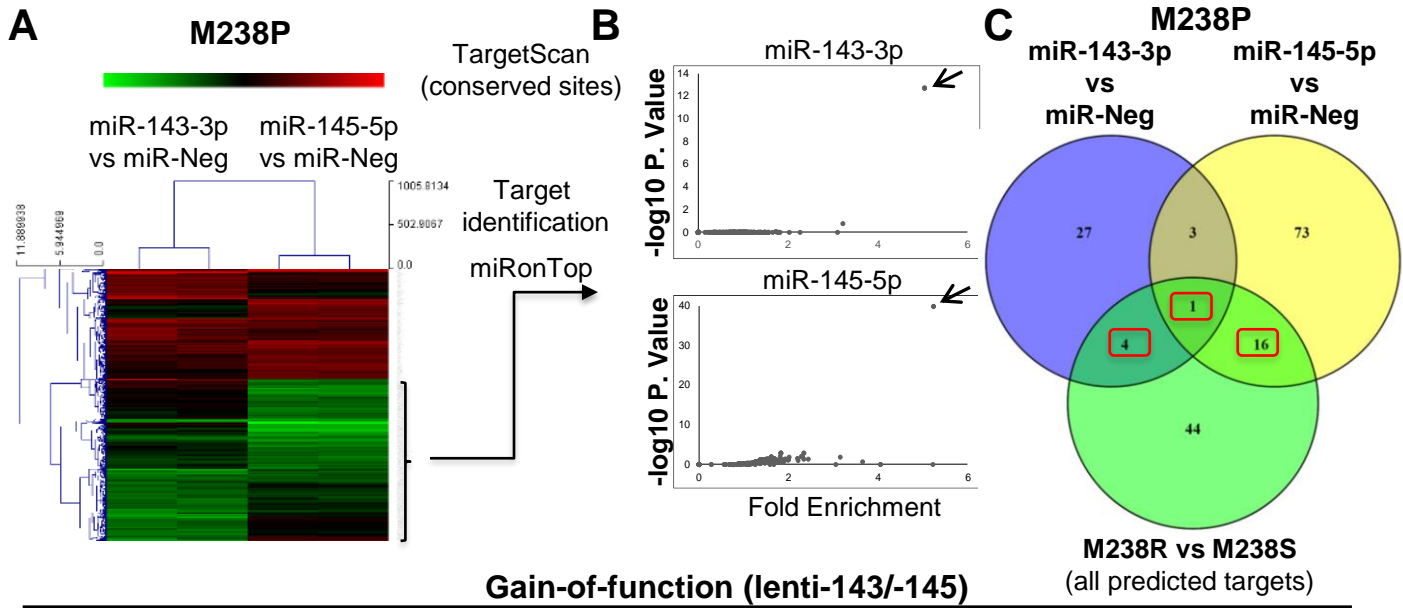

**Gain-of-function (lenti-143/145)**

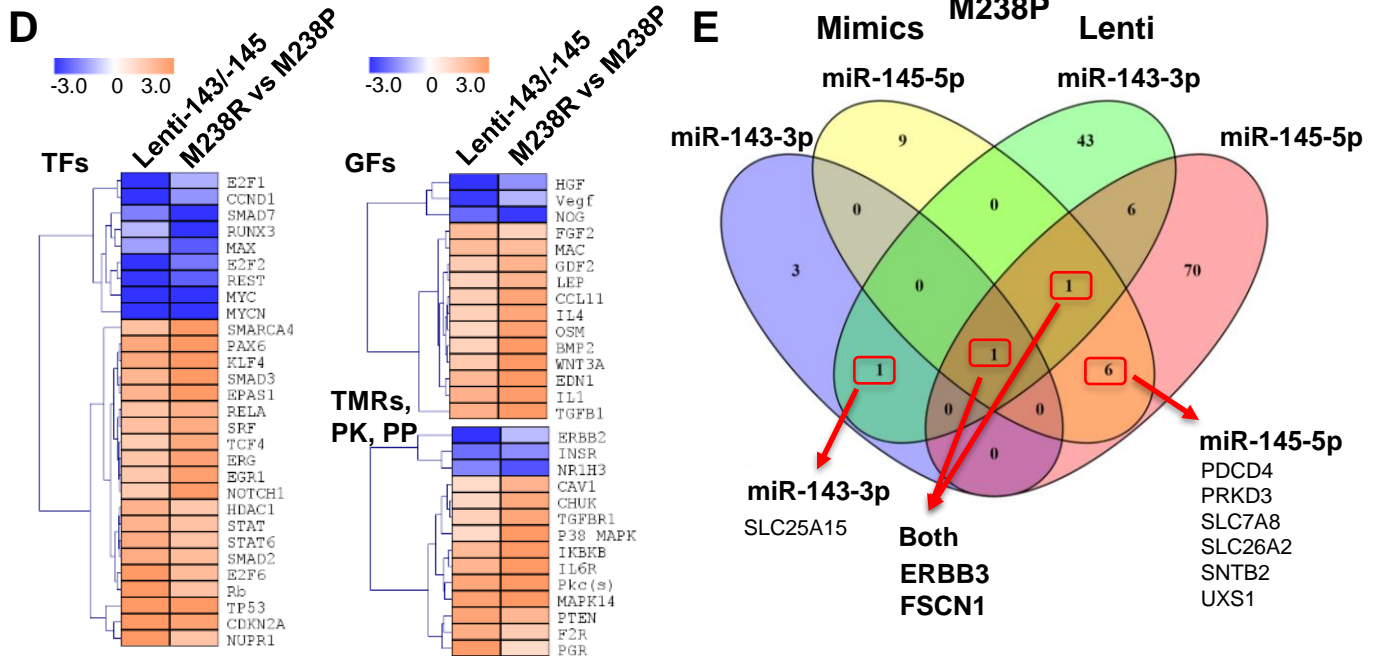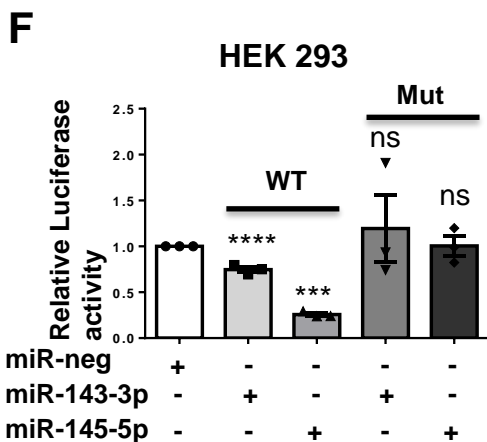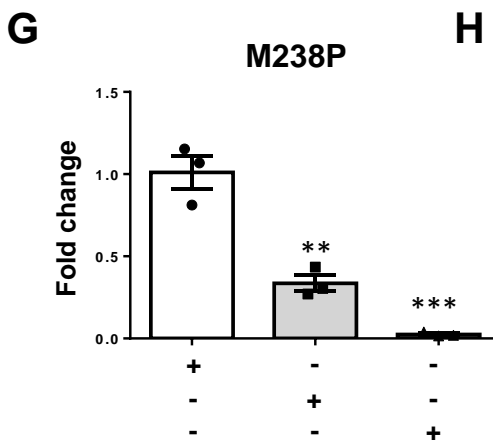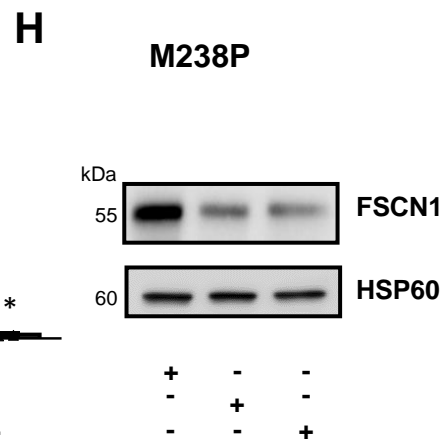

In vivo xenograft 1205Lu

**A**

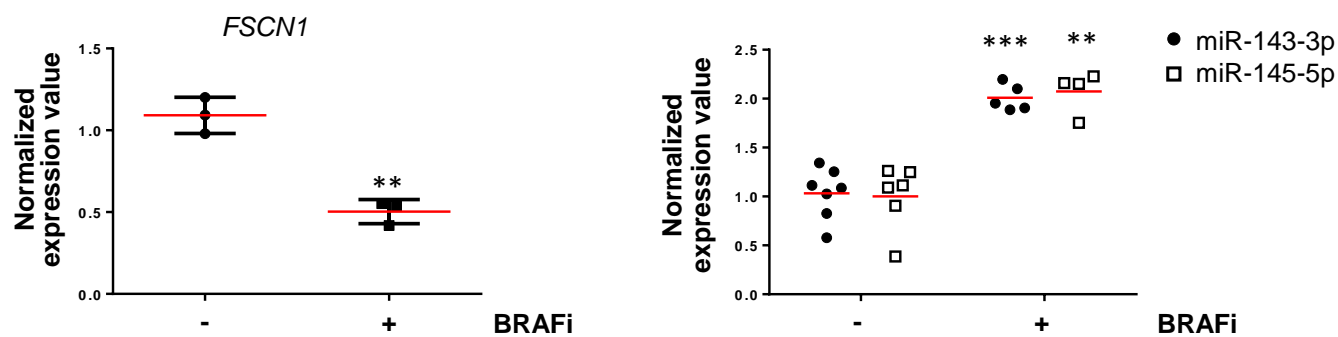

**B**

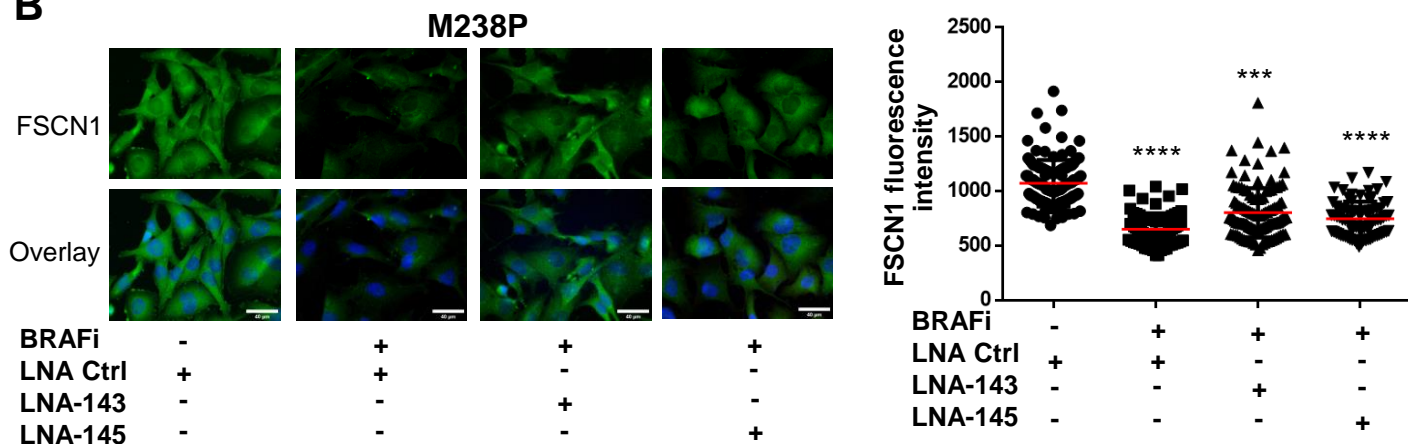

**C**

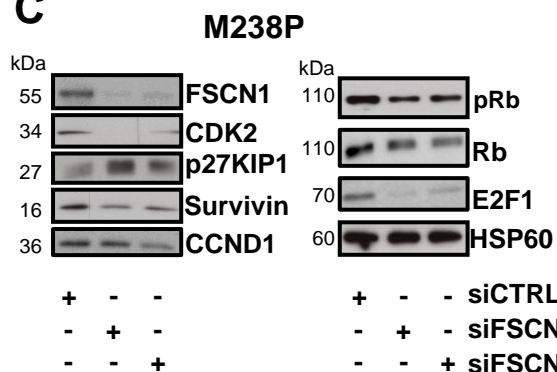

**D**

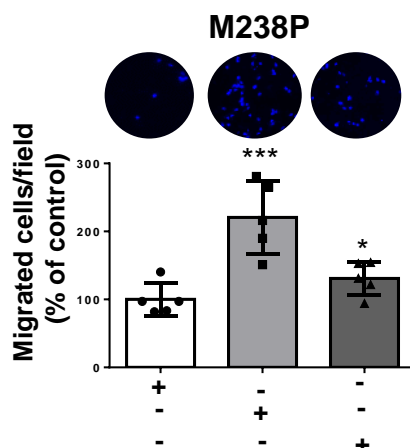

**E**

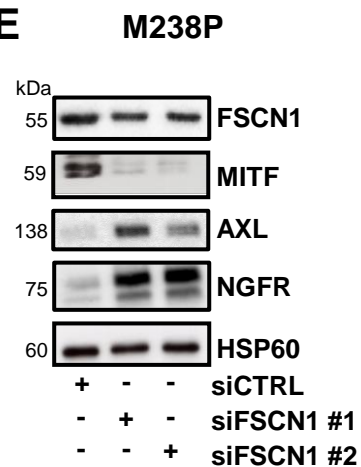

**F**

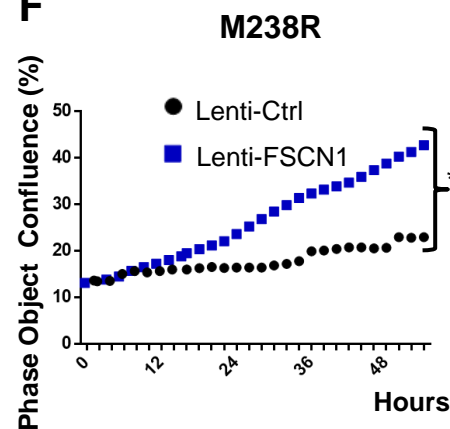

**G**

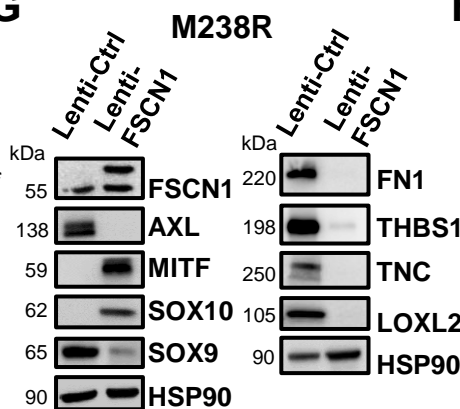

**H**

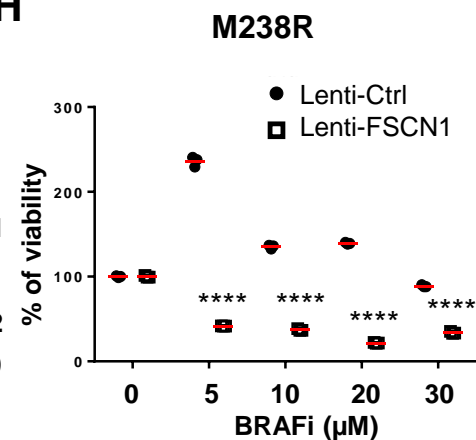

**A**

**M238P**

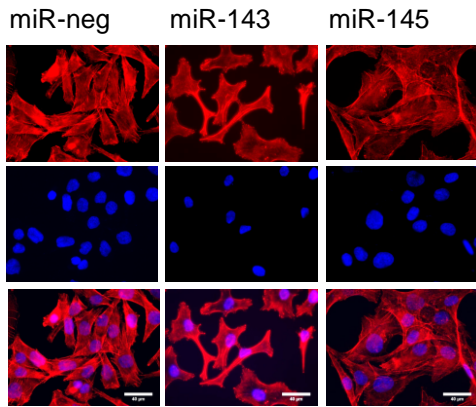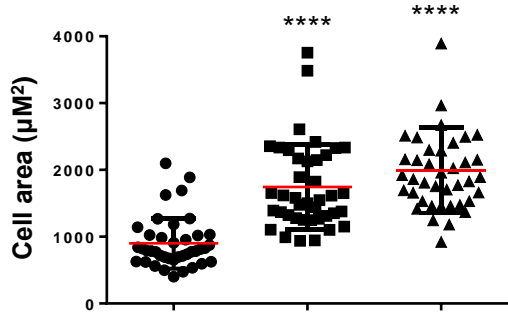

**B**

**M238P**

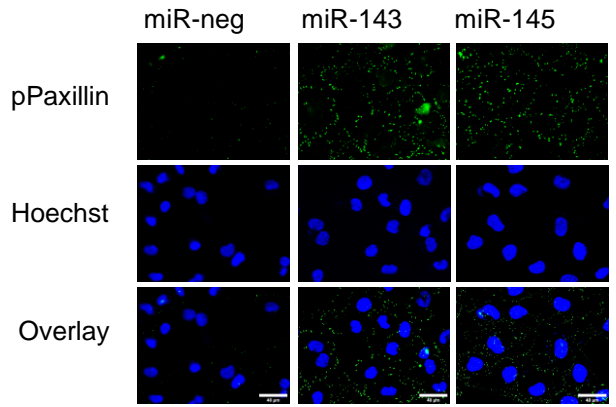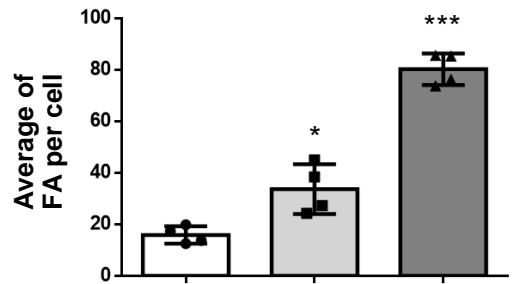

**C**

**M238P**

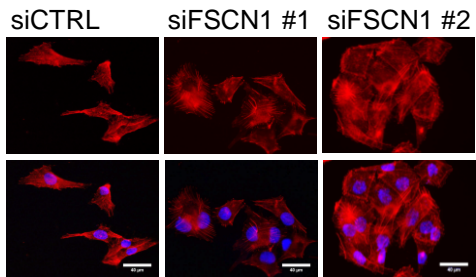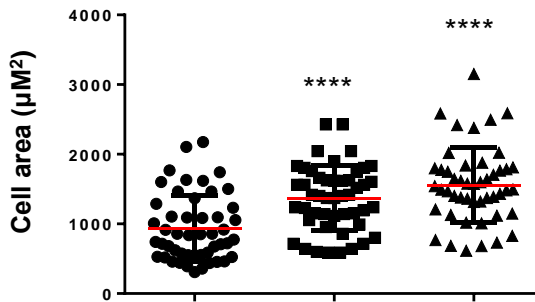

**D**

**M238P**

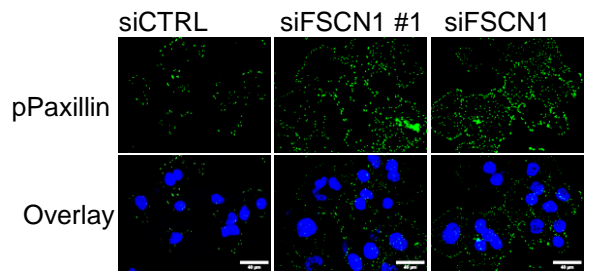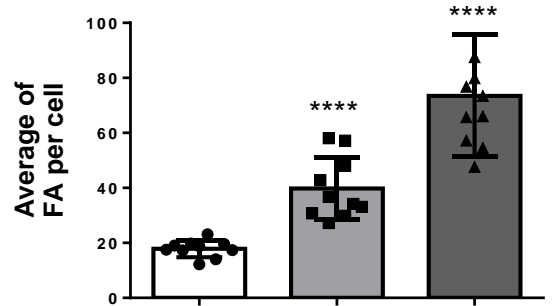

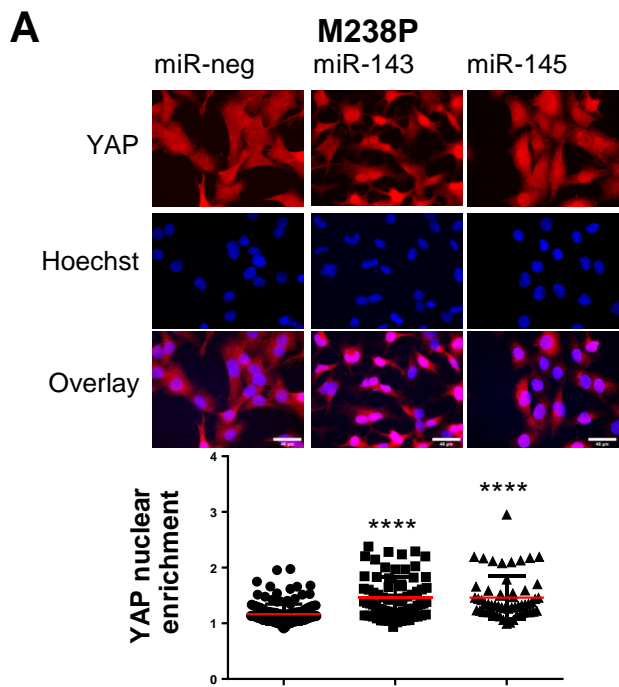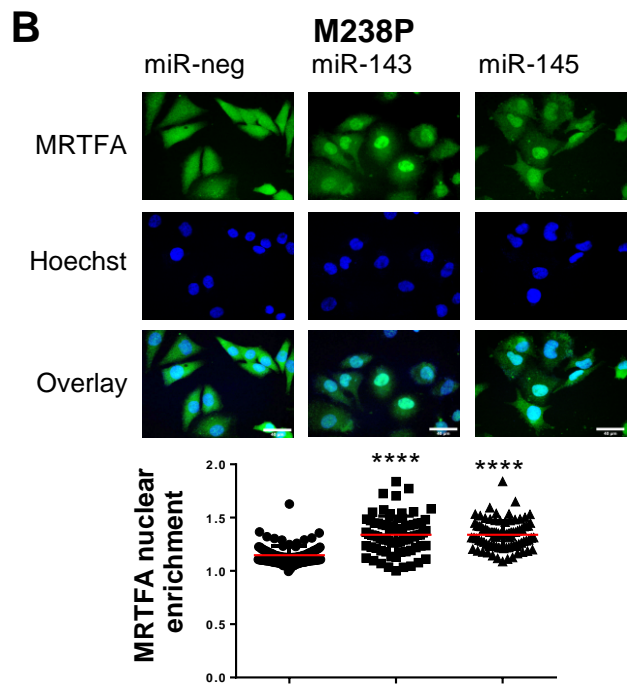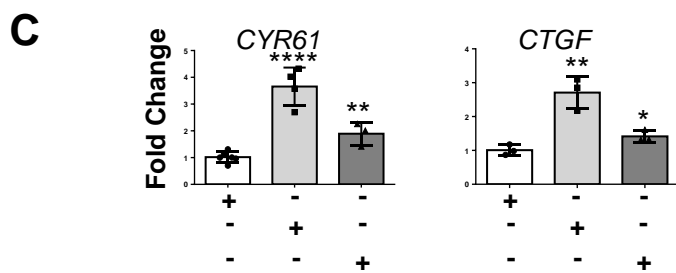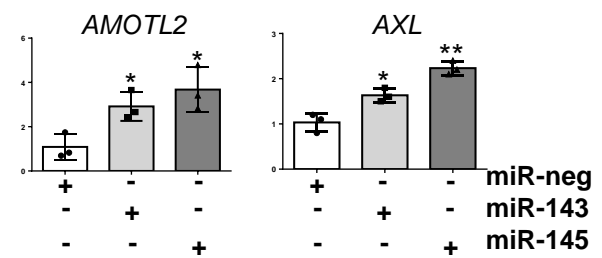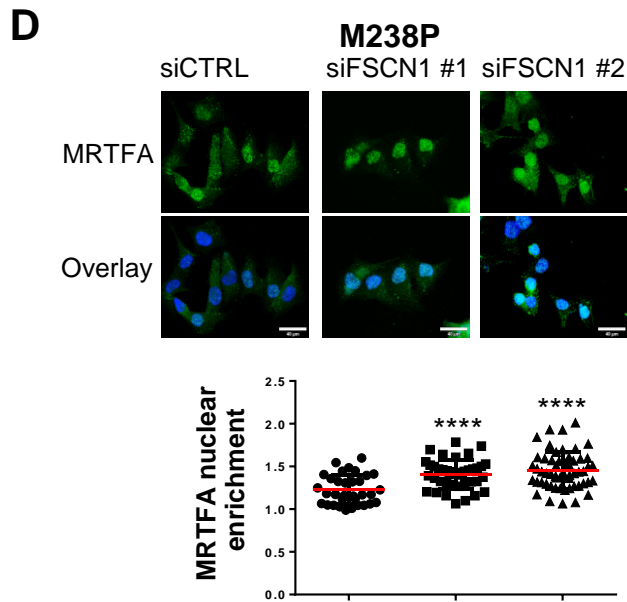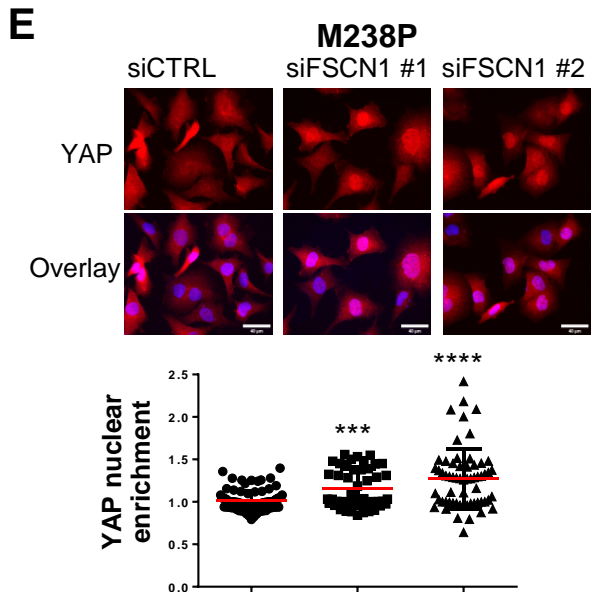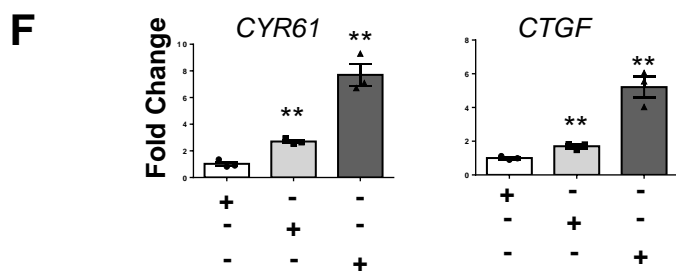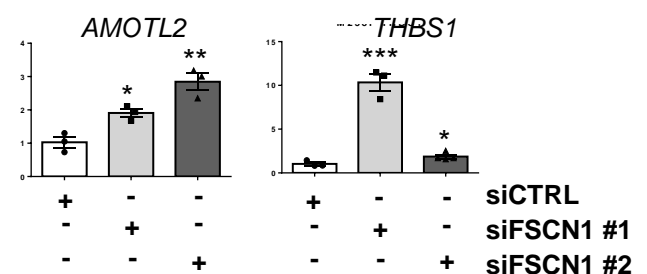



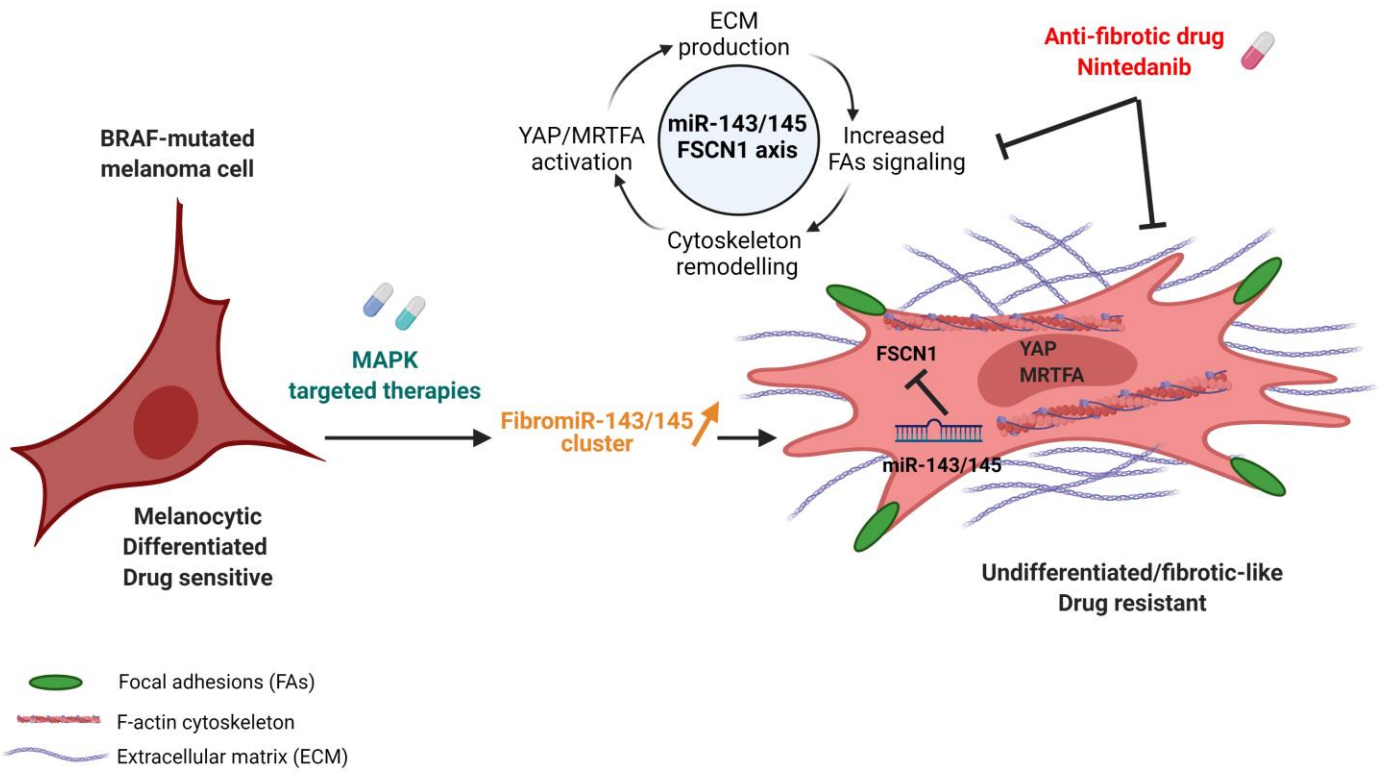

## **Supplementary Material and Methods:**

### **Cell transduction:**

A DNA sequence containing the miR-143/145 cluster was cloned into a pLX307 vector by Sigma-Aldrich. The vector used for FSCN1 overexpression is described in [46]. Lentiviral particles were produced by the PVM Vectorology Platform in Montpellier, France. Melanoma cells were transduced as follows. After 20 min incubation of melanoma cells with lentiviral particles diluted in Optimem, complete medium (7% FBS) was added to the cells. Forty-eight hours after transduction, the process of antibiotic selection was started. For cells transduced for the miR-143/145 cluster overexpression, 1 µg/mL of puromycin was administered. For cells transduced for FSCN1 overexpression, 2 µg/mL of blasticidin was administered.

### **RNAi studies:**

Non-targeting control and FSCN1 siRNA duplexes were designed by Sigma-Aldrich and used at a final concentration of 100 nM. Transfection was performed using Lipofectamine RNAiMAX (Life Technologies), according to the manufacturer's instructions. Cells were analyzed 72 h post-transfection.

### **miRNAs overexpression and inhibition:**

Pre-miRNAs -143-3p and -145-5p and control miRNA (miR-neg#1) were purchased from Ambion. LNA-based miRNAs inhibitors vs. miR-143-3p and miR-145-5p and the respective control (negative control A) were purchased from Qiagen. Pre-miRNAs were used at a final concentration of 30 nM, LNA inhibitors at a final concentration of 50 nM. Transfection was performed using Lipofectamine RNAiMAX (Life Technologies), according to the manufacturer's instructions. Cells were analyzed 72 h post-transfection unless otherwise stated.

### **Luciferase assay:**

Molecular constructs for luciferase assay were made in psiCHECK-2 vectors from Promega by cloning upstream of the Renilla luciferase gene annealed oligonucleotides based on the 3'UTR of target genes. HEK239 cells were plated on 96-well plates and co-transfected with 0.2 µg of psiCHECK-2 plasmid constructs and 10 nM of pre-miRNAs (miR-143-3p, miR-145-5p) or control pre-miRNA. Transfections were performed using Lipofectamine 3000, following the manufacturer's instructions. Firefly and Renilla luciferase activities were measured using the Dual-Glo Luciferase assay kit by Promega 48 hours after transfection.

### **Conditioned medium preparation:**

Medium conditioned by melanoma cells was harvested, centrifuged for 5 min at 2,500g and filtered with 0.22 µm filters to eliminate cell debris.

### **Tumors and cells RNA extraction:**

Total RNA was extracted from tumors and cell samples with the miRNeasy Mini Kit (Qiagen) according to the manufacturer's instructions.

### **Real-time quantitative PCR:**

#### Gene expression:

Protocol using the Step One (Applied Biosystem): 1 µg of extracted RNA was reverse transcribed into cDNA using the Multiscribe reverse transcriptase kit provided by Applied Biosystems. Primers were designed using PrimerBank or adopted from published studies. Gene expression levels were measured using Platinum SYBR Green qPCR Supermix (Fisher Scientific) and Step One thermocycler. Results from qPCR were normalized using the reference gene RPL32 and relative gene expression was quantified with the  $\Delta\Delta C_t$  method. Heatmaps describing gene expression fold changes were prepared using MeV software.

Protocol using the Biomark HD System Analysis (Fluidigm Corporation, USA):

cDNAs were prepared from 100 ng of RNA using Fluidigm Reverse Transcription Master Mix (Fluidigm PN 100-647297). Following a pre-amplification step (Fluidigm® PreAmp Master Mix and DELTAgene™ Assay kits) and exonuclease I treatment, samples diluted in Eva-Green® Supermix with Low ROX were loaded with primer reaction mixes in 96.96 Dynamic Array™ IFCs. Gene expression was then assessed on a Fluidigm BioMark HD instrument. Data were analyzed with real-time PCR analysis software (Fluidigm Corporation), and presented as relative gene expression according to the  $\Delta\Delta C_t$  method. Heatmaps depicting fold changes of gene expression were prepared using MeV software.

miRNAs expression: 20 ng of extracted RNA was reverse transcribed into cDNA using the miRCURY LNA RT kit (Qiagen). Mature miRNAs expression levels were measured using the miRCURY LNA SYBR Green PCR kit (Qiagen). Results from qPCR were normalized using miR-16-5p and relative gene expression was quantified with the  $\Delta\Delta C_t$  method. miRCURY LNA miRNA PCR assays for detecting miR-143, miR-145, and miR-16 were purchased by Qiagen.

Information on primer sequences used in this study is provided in table S4 and S5.

**Immunoblot analysis and antibodies:**

Whole-cell lysates were prepared using RIPA buffer supplemented with protease and phosphatase inhibitor (Pierce, Fisher Scientific), briefly sonicated and centrifuged for 20 min, 4°C at 14000 rpm. Whole-cell lysates and conditioned media were separated using SDS-PAGE and transferred into PVDF membranes (GE Healthcare Life Science) for immunoblot analysis. Incubation of membranes with primary antibody was performed overnight. After washing, membranes were incubated with the peroxidase-conjugated secondary antibody. A chemiluminescence system (GE Healthcare Life Science) was used to develop blots. HSP60

or HSP90 were used as loading control. For immunoblot analysis of conditioned media experiments, Ponceau red staining was used as loading control.

Information on antibodies used in this study is provided in table S6.

### **Immunofluorescence and microscopy:**

Cell monolayers were grown on glass coverslips or collagen-coated coverslips (10 µg/mL). After the indicated treatments, cells were washed in PBS, fixed in 4% PFA, permeabilized in PBS 0.3% Triton and blocked in PBS 5% goat serum. Coverslips were then incubated overnight at 4°C with primary antibody diluted in PBS 5% goat serum. Following 1 h incubation with Alexa-fluor conjugated secondary antibody, coverslips were mounted with Prolong antifade mounting reagent (ThermoFisher Scientific). Nuclei were stained with Hoechst 33342 (Life Technologies). F-actin was stained with Alexa Fluor 488 phalloidin (Fisher Scientific) or phalloidin-iFluor 594 (Abcam) reagents. Coverslips were imaged using a wide-field Leica DM5500B microscope.

### **Fibrillar collagen imaging:**

Collagen in paraffin-embedded tumors was stained with picrosirius red using standard protocols. Tumor sections were analyzed by polarized light microscopy as described [26]. Images were acquired under polarized illumination using a light transmission microscope (Zeiss PALM, at 10x magnification). Fiber thickness was analyzed by the change in polarization color. Birefringence hue and amount were quantified as a percent of total tissue area using ImageJ software.

### **Viability assay:**

After the indicated treatments, cells were stained with 0.04% crystal violet, 20% ethanol in PBS for 30 min. Following accurate washing of the plate, representative

photographs were taken. The crystal violet dye was solubilized by 10% acetic acid in PBS and measured by absorbance at 595 nm.

### **Proliferation assay:**

For real-time analysis of cell proliferation,  $3 \times 10^4$  cells were plated in complete medium in triplicates on 12-well plates. The Incucyte ZOOM imaging system (Essen Bioscience) was used. Phase-contrast pictures were taken every hour. Proliferation curves were generated using the IncuCyte cell proliferation assay software based on cell confluence.

### **Cell cycle analysis:**

Cell cycle analysis was performed by flow cytometry analysis of cells stained with propidium iodide. After fixation in ice-cold 70% ethanol, cells were stained with 40  $\mu\text{g}/\text{mL}$  propidium iodide in PBS with 100  $\mu\text{g}/\text{mL}$  RNase A. The samples were then analyzed on a BD FACSCanto cytometer.

### **Migration and invasion assays:**

Migration properties of melanoma cells were tested using Boyden chambers containing polycarbonate membranes (8  $\mu\text{m}$  pores transwell from Corning). After overnight starvation,  $1 \times 10^4$  cells were seeded on the upper side of the chambers placed on 24 well plates containing 10% FBS medium for 24 h, unless otherwise stated, at 37°C in 5%  $\text{CO}_2$ . At the end of the experiment, cells migrated on the lower side of the chambers were fixed in 4% paraformaldehyde, stained for 15 min with Hoechst and imaged at the microscope (5 random fields per well). Nuclei counting was performed using the ImageJ software. To assess invasion properties of melanoma cells, transwells were coated with Matrigel (1 mg/mL) and cell solution was added on the top of the matrigel coating to simulate invasion through the extracellular matrix.

### **Immunofluorescence analysis:**

Cell area was measured on cells stained for F-Actin using ImageJ. The nuclear/cytosolic ratio of YAP or MRTF was quantified by measuring the nuclear and cytosolic fluorescence intensity using ImageJ. The Hoechst staining was used to define nuclear versus cytosolic regions. Focal adhesions were quantified using ImageJ. Pictures were subjected to background subtraction (rolling: 10) before analysis, then "default threshold" was applied, followed by "analyze particles of object with a size 0.20 and infinity" to analyze the number of objects and their area. The number of focal adhesions was normalized to the total cell area.

### **Microarray gene expression analysis:**

Total RNA integrity was tested with the Agilent BioAnalyser 2100 (Agilent Technologies). After labeling RNA samples with the Cy3 dye using the low RNA input QuickAmp kit (Agilent) following the manufacturer's instruction, labeled cRNA probes were hybridized on 8x60K high-density SurePrint G3 gene expression human Agilent microarrays.

### **RNA-sequencing:**

Short reads: Libraries were generated from 500ng of total RNAs using Truseq Stranded Total RNA kit (Illumina). Libraries were then quantified with KAPA library quantification kit (Kapa Biosystems) and pooled. 4nM of this pool were loaded on a high output flowcell and sequenced on an Illumina NextSeq500 sequencer using 2×75bp paired-end chemistry. Reads were aligned to the human genome release hg38 with STAR 2.5.2a as previously described [26].

Nanopore long reads: libraries were prepared according to the PCR-cDNA Barcoding protocol (SQK – PCB109). Briefly, 50 ng of total RNA was reverse-transcribed, barcoded and amplified by PCR (17 cycles) and sequencing adapters were added. The two barcoded libraries (CARMN RNA 238R and CARMN RNA 238S) were mixed 1:1, and 110 fmol was

loaded on a PromethION flow cell (FLO-PRO002). Reads were processed with the FLAIR pipeline (<https://doi.org/10.1038/s41467-020-15171-6>). Raw reads were aligned to hg38 with minimap2 (version 2.17-r941). Misaligned splice sites were corrected according to the GENCODE v.35 annotations. High confidence isoforms were defined after grouping corrected reads of all samples sharing same unique splice junctions, by selecting for each group a representative isoform with confident TSS/TES and supported by more than 3 reads. Selected isoforms were quantified using minimap2 in each sample. Differential isoform expression and alternative splicing events significance were tested without replicates using ad-hoc scripts provided on the Brook's lab Github (<https://github.com/BrooksLabUCSC/FLAIR>).

Statistical analysis and Biological Theme Analysis: Microarray data analyses were performed using R (<http://www.r-project.org/>). Quality control of expression arrays was performed using the Bioconductor package arrayQualityMetrics and custom R scripts. Additional analyses of expression arrays were performed using the Bioconductor package limma. Briefly, data were normalized using the quantile method. No background subtraction was performed. Replicated probes were averaged after normalization and control probes removed. Statistical significance was assessed using the limma moderated t-statistic. Quality control of RNA-seq count data was assessed using in-house R scripts. Normalization and statistical analysis were performed using Bioconductor package DESeq2. All P-values were adjusted for multiple testing using the Benjamini-Hochberg procedure, which controls the false discovery rate (FDR). Differentially expressed genes were selected based on an adjusted p-value below 0.05. Enrichment in biological themes (Molecular function, Upstream regulators and canonical pathways) were performed using Ingenuity Pathway Analysis software (<http://www.ingenuity.com/>).

#### **miRNA targets analysis:**



MiRonTop is an online java web tool (<http://www.genomique.info/>) [31] integrating whole transcriptome expression data to investigate if specific miRNAs are involved in a specific biological system. MiRonTop classifies transcripts into two categories ('Upregulated' and 'Downregulated'), based on thresholds for expression level, differential expression, and statistical significance. It then analyzes the number of predicted targets for each miRNA, according to the prediction software selected (Targetscan, exact seed search, TarBase).

## SUPPLEMENTARY TABLES

**Table S1. List of themes corresponding to “Molecular functions” annotations associated with miR-143-3p and miR-145-5p mimics overexpression in human M238P melanoma cells identified by Ingenuity Pathway Analysis.** M238P cells were transfected with miR-143, miR-145 or a control mimic (72 h, 30 nM). Expression profiles were determined with Agilent whole genome microarrays (Dataset 1). Z-scores calculated for each pathway (miR-143-3p or miR-145-5p vs miR-Neg) are indicated. Significant pathways are shown in progressively brighter shades of blue (repression) and orange (activation) according to their significance.

| Molecular Functions                    | - Log <sub>10</sub> (P Val) |            |
|----------------------------------------|-----------------------------|------------|
|                                        | miR-143-3p                  | miR-145-5p |
| Migration of cells                     | 12.13                       | 15.13      |
| Cell movement                          | 11.08                       | 14.26      |
| Cell proliferation of tumor cell lines | 11.80                       | 11.09      |
| Invasion of cells                      | 10.24                       | 8.80       |
| Migration of tumor cell lines          | 10.46                       | 7.65       |
| Cell movement of tumor cell lines      | 8.93                        | 9.02       |
| Organization of cytoplasm              | 8.27                        | 9.26       |
| Organization of cytoskeleton           | 6.44                        | 10.13      |
| Necrosis                               | 10.62                       | 5.59       |
| Apoptosis                              | 10.07                       | 5.72       |
| Cell death of tumor cell lines         | 10.28                       | 4.99       |
| Invasion of tumor cell lines           | 9.31                        | 5.86       |
| Cell survival                          | 8.75                        | 5.23       |
| Cell viability                         | 8.90                        | 4.96       |
| Microtubule dynamics                   | 4.54                        | 9.04       |
| Cell cycle progression                 | 8.08                        | 4.99       |
| Apoptosis of tumor cell lines          | 6.70                        | 4.56       |
| Cell viability of tumor cell lines     | 6.02                        | 4.61       |
| Phosphorylation of protein             | 3.60                        | 6.83       |
| Sprouting                              | 3.61                        | 6.61       |
| Formation of cellular protrusions      | 0.00                        | 10.05      |
| Colony formation of cells              | 6.12                        | 3.70       |
| Biosynthesis of amide                  | 3.80                        | 5.76       |
| Migration of cancer cells              | 0.00                        | 9.02       |
| Migration of tumor cells               | 0.00                        | 8.84       |
| Cell movement of tumor cells           | 0.00                        | 8.82       |

|                                       |      |      |
|---------------------------------------|------|------|
| Interphase                            | 8.15 | 0.00 |
| DNA replication                       | 7.64 | 0.00 |
| Transmigration of cells               | 0.00 | 7.62 |
| Arrest in interphase                  | 6.86 | 0.00 |
| G1/S phase transition                 | 6.81 | 0.00 |
| G1 phase                              | 6.70 | 0.00 |
| Mitosis                               | 6.58 | 0.00 |
| Metabolism of DNA                     | 6.21 | 0.00 |
| Synthesis of DNA                      | 6.20 | 0.00 |
| Damage of chromosomes                 | 6.00 | 0.00 |
| Metabolism of reactive oxygen species | 5.44 | 0.00 |
| Chromosomal aberration                | 5.37 | 0.00 |
| Entry into interphase                 | 5.30 | 0.00 |
| Chromosomal instability               | 5.23 | 0.00 |
| Arrest in mitosis                     | 5.23 | 0.00 |
| Synthesis of glycosaminoglycan        | 0.00 | 5.19 |
| Secretion of molecule                 | 0.00 | 5.16 |
| Synthesis of lipid                    | 0.00 | 5.16 |

**Table S2. List of the main predicted targets for miR-143-3p and miR-145-5p**

**significantly downregulated following mimics overexpression in human M238P**

**melanoma cells using the bioinformatics tool miRonTop**

(<https://www.genomique.info:8443/merge/index>) [31].

M238P cells were transfected with miR-143, miR-145 or a control mimic (48 h, 30 nM).

Expression profiles were determined with Agilent whole genome microarrays (Dataset 1).

Predicted targets were obtained using the Targetscan database (conserved sites)

([www.targetscan.org](http://www.targetscan.org)). Av.Exp: logarithm (base 2) of the average intensity ; logFC: logarithm

(base 2) of the ratio of miR-143-3p or miR-145-5p vs miR-Neg; Adj.pVal: Benjamini-

Hochberg adjusted pValue. The thresholds used for the analysis are: Av.Exp >6, LogFC <-1

and adj.pVal <0.05.

| miR-143-3p predicted targets |        |       |          | miR-145-5p predicted targets |        |       |          |
|------------------------------|--------|-------|----------|------------------------------|--------|-------|----------|
| Symbol                       | Av.Exp | LogFC | Adj.pVal | Symbol                       | Av.Exp | LogFC | Adj.pVal |
| ABHD14                       |        |       |          | ABCE1                        | 9.99   | -1.25 | 1.09E-04 |
| A                            | 11.92  | -1.27 | 5.62E-05 | ADAM19                       | 10.63  | -1.52 | 1.07E-05 |
| ADD3                         | 9.14   | -1.20 | 3.48E-05 | ADD3                         | 9.14   | -1.87 | 6.14E-07 |
| ASAP3                        | 6.68   | -1.29 | 3.10E-05 | ADPGK                        | 9.60   | -1.73 | 1.37E-06 |
| ATP6V1A                      | 12.26  | -1.17 | 4.49E-05 | AKAP12                       | 7.28   | -1.64 | 3.69E-06 |
| BCL2                         | 6.29   | -1.14 | 1.07E-04 | AKAP9                        | 10.57  | -1.03 | 1.06E-04 |
| CDK1                         | 9.61   | -1.14 | 5.44E-05 | APH1A                        | 8.43   | -1.17 | 5.44E-05 |
| CNNM3                        | 6.94   | -1.32 | 3.35E-05 | ARF6                         | 7.76   | -1.82 | 1.57E-06 |
| EFS                          | 10.95  | -1.35 | 2.40E-05 | ASAP2                        | 10.19  | -1.23 | 2.71E-05 |
| ERBB3                        | 9.88   | -1.12 | 1.56E-04 | BIRC2                        | 10.41  | -1.06 | 6.93E-05 |
| GFPT2                        | 9.78   | -1.81 | 1.72E-06 | BLOC1S2                      | 11.06  | -1.10 | 6.93E-05 |
| GHR                          | 6.97   | -1.38 | 2.74E-05 | BRCC3                        | 10.32  | -1.00 | 8.85E-04 |
| GOLM1                        | 8.60   | -1.84 | 4.79E-06 | C5ORF15                      | 11.31  | -2.00 | 5.42E-07 |
| HK2                          | 10.12  | -1.32 | 5.80E-05 | CABLES1                      | 8.01   | -1.11 | 6.54E-05 |
| KCNC1                        | 6.84   | -1.21 | 4.94E-05 | CBFB                         | 10.17  | -2.24 | 1.98E-07 |
| KIF3B                        | 9.68   | -1.25 | 3.70E-05 | CREB5                        | 8.62   | -1.13 | 9.63E-05 |
| LRRRC8B                      | 6.49   | -1.06 | 1.14E-04 | DPYSL2                       | 9.81   | -1.28 | 1.68E-05 |
| MAD2L1                       | 9.21   | -1.03 | 1.26E-04 | EIF4EBP2                     | 8.75   | -1.43 | 5.75E-06 |
| MSI2                         | 9.99   | -1.19 | 5.05E-05 | ERBB3                        | 9.88   | -1.41 | 1.74E-05 |
| PC                           | 10.53  | -1.19 | 4.41E-05 | ETNK1                        | 9.13   | -1.09 | 4.90E-05 |
| PDPR                         | 8.45   | -1.55 | 1.05E-05 | EXOC2                        | 6.74   | -1.01 | 1.51E-04 |
| PNPO                         | 10.74  | -1.00 | 4.15E-03 | FAM174B                      | 8.86   | -1.69 | 1.40E-06 |
| QDPR                         | 8.99   | -1.04 | 4.98E-04 | FMNL2                        | 9.74   | -1.57 | 8.25E-06 |
| RARG                         | 10.30  | -1.59 | 6.68E-06 |                              |        |       |          |

|         |       |       |          |           |       |       |          |
|---------|-------|-------|----------|-----------|-------|-------|----------|
| SERPINE |       |       |          |           |       |       |          |
| 1       | 6.66  | -1.43 | 3.70E-05 | FSCN1     | 13.75 | -3.24 | 3.35E-08 |
| SLC25A1 |       |       |          | G3BP1     | 12.80 | -2.19 | 4.63E-07 |
| 5       | 8.77  | -1.06 | 9.14E-05 | GABARAPL  |       |       |          |
| SLC35F1 | 7.39  | -1.48 | 7.75E-06 | 2         | 9.73  | -1.93 | 1.10E-06 |
| SLC39A1 |       |       |          | GALNT1    | 8.59  | -1.34 | 1.28E-05 |
| 0       | 8.40  | -1.52 | 7.75E-06 | GMFB      | 8.71  | -1.82 | 1.22E-06 |
| SLC39A1 |       |       |          | GRB10     | 11.17 | -1.39 | 6.25E-05 |
| 1       | 7.93  | -1.26 | 3.35E-05 | HLTF      | 9.16  | -1.26 | 1.77E-05 |
| TERT    | 7.44  | -1.07 | 3.18E-04 | HMGB3     | 7.94  | -2.13 | 3.61E-07 |
| TPM3    | 12.64 | -2.03 | 7.16E-07 | HS6ST1    | 8.38  | -1.29 | 1.78E-05 |
| TUB     | 6.61  | -1.64 | 4.79E-06 | ITGB8     | 9.52  | -1.63 | 1.82E-06 |
| UBE2E3  | 9.79  | -1.04 | 1.60E-04 | ITPRIPL2  | 11.56 | -1.20 | 2.81E-05 |
| UBXN2B  | 7.60  | -1.06 | 8.51E-05 | IVNS1ABP  | 10.64 | -1.43 | 6.30E-06 |
| VASH1   | 10.23 | -1.74 | 4.79E-06 | KIAA0319L | 8.36  | -1.03 | 8.13E-05 |
| WWC3    | 9.75  | -1.04 | 1.12E-04 | KIFAP3    | 12.32 | -1.04 | 1.07E-04 |
|         |       |       |          | LHFPL2    | 11.21 | -1.04 | 8.13E-05 |
|         |       |       |          | LMNB2     | 7.96  | -1.11 | 4.69E-05 |
|         |       |       |          | MAP3K1    | 12.26 | -1.18 | 2.77E-05 |
|         |       |       |          | MAP3K11   | 12.01 | -1.13 | 4.56E-04 |
|         |       |       |          | MBD2      | 10.53 | -1.11 | 5.48E-05 |
|         |       |       |          | MDFIC     | 7.89  | -1.73 | 2.26E-06 |
|         |       |       |          | MED13     | 10.11 | -1.25 | 2.32E-05 |
|         |       |       |          | MGAT4B    | 11.98 | -1.69 | 2.59E-06 |
|         |       |       |          | MOCS2     | 8.77  | -1.12 | 8.38E-05 |
|         |       |       |          | MPP5      | 9.88  | -1.18 | 3.85E-05 |
|         |       |       |          | MRPL17    | 11.19 | -1.50 | 3.69E-06 |
|         |       |       |          | MYO5A     | 9.72  | -2.07 | 2.49E-06 |
|         |       |       |          | NAP1L1    | 11.37 | -1.50 | 6.77E-06 |
|         |       |       |          | NDFIP2    | 10.04 | -1.44 | 5.23E-06 |
|         |       |       |          | NDUFA4    | 15.07 | -1.88 | 8.46E-07 |
|         |       |       |          | NFIB      | 8.57  | -1.08 | 9.54E-05 |
|         |       |       |          | NUAK1     | 8.39  | -1.22 | 2.43E-05 |
|         |       |       |          | NUDT3     | 8.25  | -1.29 | 1.55E-05 |
|         |       |       |          | OTOR      | 14.05 | -1.60 | 2.40E-06 |
|         |       |       |          | PAFAH1B2  | 10.81 | -1.63 | 2.45E-06 |
|         |       |       |          | PCBP2     | 7.63  | -1.82 | 1.22E-06 |
|         |       |       |          | PDCD4     | 8.79  | -1.77 | 1.40E-06 |
|         |       |       |          | PODXL     | 9.07  | -1.12 | 8.56E-05 |
|         |       |       |          | PPIP5K2   | 8.19  | -1.07 | 6.75E-05 |
|         |       |       |          | PPP3CA    | 8.43  | -1.22 | 3.00E-05 |
|         |       |       |          | PPP6C     | 6.49  | -1.01 | 1.38E-04 |
|         |       |       |          | PRKD3     | 9.26  | -1.82 | 7.71E-07 |
|         |       |       |          | RIN2      | 8.53  | -1.38 | 1.12E-05 |
|         |       |       |          | RNF170    | 7.87  | -1.54 | 3.82E-06 |
|         |       |       |          | SAP30L    | 7.20  | -1.10 | 4.57E-05 |
|         |       |       |          | SERINC5   | 6.96  | -1.47 | 4.83E-05 |

|          |       |       |          |
|----------|-------|-------|----------|
| SERPINE1 | 6.66  | -2.09 | 1.16E-06 |
| SIRPA    | 7.15  | -1.69 | 1.64E-06 |
| SLC26A2  | 13.07 | -2.69 | 5.27E-08 |
| SLC35B3  | 7.46  | -1.35 | 1.77E-05 |
| SLC7A8   | 8.83  | -1.21 | 1.89E-04 |
| SNTB2    | 10.06 | -1.20 | 4.68E-05 |
| SOX11    | 10.83 | -1.20 | 4.01E-05 |
| ST3GAL6  | 8.87  | -1.11 | 4.71E-05 |
| STC1     | 7.97  | -1.08 | 8.01E-05 |
| SWAP70   | 8.11  | -2.48 | 8.21E-08 |
| TAGLN2   | 10.49 | -1.15 | 6.26E-05 |
| TGFBR2   | 11.53 | -2.13 | 3.61E-07 |
| TPM3     | 12.64 | -1.65 | 1.72E-06 |
| TRIM2    | 8.90  | -2.47 | 8.21E-08 |
| TRIM44   | 10.01 | -1.16 | 8.07E-05 |
| TSPAN6   | 8.93  | -1.39 | 7.83E-06 |
| TULP4    | 12.85 | -1.04 | 7.27E-05 |
| UBXN4    | 8.00  | -1.03 | 1.35E-04 |
| UHMK1    | 10.08 | -1.97 | 7.41E-07 |
| USP13    | 8.44  | -1.02 | 3.89E-04 |
| UXS1     | 10.78 | -1.30 | 1.56E-05 |
| XRN1     | 8.28  | -1.08 | 1.00E-04 |
| YES1     | 8.72  | -1.07 | 1.07E-04 |
| ZBTB33   | 8.15  | -1.14 | 4.07E-05 |
| ZNF395   | 10.43 | -1.45 | 2.81E-05 |

**Table S3. List of the main predicted targets for miR-143-3p and miR-145-5p**

**significantly downregulated following stable overexpression of the miR-143/145 cluster**

**in human M238P melanoma cells using the bioinformatics tool miRonTop**

(<https://www.genomique.info:8443/merge/index>) [31].

M238P melanoma cells were transduced with a lentivirus containing the sequence of the miR-143/145 cluster or a control vector. Expression profiles were determined with RNA-seq (Dataset 2). Predicted targets were obtained using the Targetscan database (conserved sites) ([www.targetscan.org](http://www.targetscan.org)). Av.Exp: logarithm (base 2) of the base mean ; logFC: logarithm (base 2) of the ratio of miR-143/145 vs miR-Neg; Adj.pVal: Benjamini-Hochberg adjusted pValue.

The thresholds used for the analysis are: Av.Exp >6, LogFC < -1 and adj.pVal < 0.05.

| miR-143-3p predicted targets |        |       |           | miR-145-5p predicted targets |        |       |           |
|------------------------------|--------|-------|-----------|------------------------------|--------|-------|-----------|
| Symbol                       | Av.Exp | LogFC | Adj.pVal  | Symbol                       | Av.Exp | LogFC | Adj.pVal  |
| ABHD14A                      | 7.25   | -1.14 | 6.76E-05  | ADAM19                       | 10.14  | -1.89 | 4.41E-06  |
| ADD3                         | 10.82  | -2.09 | 4.98E-30  | ADD3                         | 10.82  | -2.09 | 4.98E-30  |
| ARHGEF1                      | 11.64  | -1.82 | 1.81E-16  | ANGEL2                       | 10.17  | -1.20 | 2.09E-14  |
| ARID3B                       | 7.13   | -1.37 | 7.38E-04  | APH1A                        | 11.72  | -1.51 | 3.50E-11  |
| ASAP3                        | 7.48   | -2.16 | 1.00E-14  | ARHGAP6                      | 9.18   | -1.54 | 5.81E-16  |
| ATP10A                       | 8.13   | -2.71 | 1.28E-23  | ARL5B                        | 10.12  | -1.04 | 4.18E-03  |
| C6ORF62                      | 12.36  | -1.57 | 1.26E-11  | BIRC2                        | 11.56  | -1.01 | 6.51E-03  |
| CACHD1                       | 8.72   | -1.04 | 2.04E-05  | BRI3BP                       | 10.47  | -1.33 | 1.31E-06  |
| CBFB                         | 11.14  | -1.21 | 1.62E-10  | CACHD1                       | 8.72   | -1.04 | 2.04E-05  |
| CBX5                         | 11.96  | -1.31 | 9.33E-12  | CBFB                         | 11.14  | -1.21 | 1.62E-10  |
| CCDC58                       | 9.61   | -1.14 | 1.59E-11  | CCDC25                       | 10.50  | -1.14 | 2.07E-13  |
| CDK1                         | 11.27  | -6.95 | 7.39E-63  | CDCA3                        | 9.95   | -5.20 | 4.22E-10  |
| CHEK2                        | 9.20   | -1.42 | 9.90E-08  | CIRBP                        | 12.27  | -1.08 | 3.68E-08  |
| CREBL2                       | 10.44  | -1.87 | 3.55E-35  | CTNNBIP1                     | 10.23  | -1.52 | 3.10E-07  |
| CRELD1                       | 9.77   | -1.33 | 4.44E-13  | DUT                          | 10.91  | -1.70 | 7.63E-15  |
| DLK1                         | 11.42  | -1.82 | 4.37E-20  | EBF3                         | 10.22  | -1.48 | 7.80E-24  |
| EFS                          | 8.79   | -4.13 | 1.86E-15  | EFNA3                        | 6.54   | -1.12 | 1.93E-02  |
| ENPP1                        | 7.91   | -1.06 | 1.13E-03  | EFNB3                        | 7.73   | -1.35 | 7.93E-07  |
| EPM2AIP1                     | 10.44  | -1.28 | 6.68E-15  | ERBB3                        | 11.63  | -1.80 | 1.48E-10  |
| ERBB3                        | 11.63  | -1.80 | 1.48E-10  | ERMP1                        | 9.53   | -1.22 | 6.96E-06  |
| FSCN1                        | 12.78  | -4.76 | 5.76E-117 | ESCO2                        | 8.87   | -4.77 | 2.89E-42  |
| GOLM1                        | 11.67  | -1.01 | 5.90E-08  | FANCA                        | 9.74   | -3.04 | 4.08E-18  |
| GPR124                       | 10.05  | -1.01 | 2.90E-04  | FSCN1                        | 12.78  | -4.76 | 5.76E-117 |
| GXYLT1                       | 9.35   | -2.11 | 5.74E-18  | GABARAPL2                    | 10.90  | -1.13 | 7.04E-11  |
| HRK                          | 6.05   | -1.30 | 1.85E-02  | GGT7                         | 10.85  | -1.17 | 2.88E-14  |
| KCNC1                        | 7.55   | -1.13 | 3.12E-02  | GINS2                        | 9.33   | -3.03 | 1.66E-26  |
| MAD2L1                       | 10.49  | -5.17 | 1.12E-45  | GJA5                         | 6.41   | -1.48 | 3.18E-03  |

|           |       |       |          |            |       |       |          |
|-----------|-------|-------|----------|------------|-------|-------|----------|
| MLLT3     | 8.38  | -1.23 | 4.52E-05 | GMFB       | 10.50 | -1.75 | 3.72E-12 |
| MRC2      | 13.56 | -1.24 | 2.51E-20 | GOPC       | 10.81 | -1.01 | 1.37E-10 |
| MYBL2     | 10.77 | -5.37 | 1.21E-56 | GPRC5A     | 12.72 | -1.54 | 1.85E-09 |
| NIPSNAP1  | 11.31 | -1.74 | 3.66E-33 | GXYLT1     | 9.35  | -2.11 | 5.74E-18 |
| PDGFRA    | 9.39  | -1.60 | 9.54E-17 | H2AFX      | 11.41 | -3.11 | 7.87E-16 |
| PGK1      | 14.62 | -1.51 | 2.97E-11 | HELLS      | 9.70  | -2.23 | 3.78E-24 |
| POC1A     | 8.81  | -2.07 | 9.44E-07 | HHEX       | 8.15  | -3.93 | 9.24E-09 |
| QDPR      | 10.05 | -1.79 | 1.57E-27 | HMGB3      | 10.48 | -1.52 | 5.46E-06 |
| RARG      | 10.58 | -1.68 | 3.60E-16 | HOMER2     | 8.19  | -1.04 | 5.66E-06 |
| SERPINE1  | 11.06 | -1.86 | 4.90E-08 | KCNMB4     | 6.38  | -1.32 | 8.59E-04 |
| SLC25A15  | 9.46  | -1.01 | 1.69E-07 | KIAA1586   | 8.57  | -1.25 | 1.60E-07 |
| SMARCD2   | 11.49 | -1.49 | 1.55E-19 | LDLRAD3    | 10.33 | -1.48 | 6.52E-16 |
| SOBP      | 8.58  | -1.05 | 1.95E-03 | LMNB2      | 12.26 | -1.95 | 1.32E-09 |
| STOX2     | 7.49  | -1.39 | 3.71E-04 | MAP2K6     | 6.84  | -1.81 | 3.16E-06 |
| TERT      | 6.91  | -4.77 | 2.12E-15 | MAP3K11    | 11.00 | -1.48 | 1.71E-09 |
| TIGD5     | 8.57  | -1.78 | 3.22E-07 | MDFIC      | 10.26 | -1.42 | 1.48E-07 |
| TMEM134   | 9.10  | -1.02 | 1.36E-05 | MEST       | 6.30  | -2.13 | 1.36E-02 |
| TNFRSF11A | 6.19  | -1.42 | 5.56E-04 | MGAT4B     | 12.19 | -1.01 | 2.66E-11 |
| TPM3      | 13.36 | -2.41 | 1.19E-67 | MRPL17     | 10.93 | -1.13 | 2.99E-14 |
| TUB       | 8.43  | -3.22 | 2.37E-32 | NET1       | 10.54 | -1.69 | 3.35E-26 |
| UCK2      | 11.33 | -1.22 | 5.63E-15 | NFIA       | 7.40  | -1.18 | 4.77E-05 |
| VASH1     | 9.32  | -1.10 | 8.57E-07 | NINL       | 6.07  | -1.30 | 8.01E-03 |
| VWA1      | 10.50 | -1.30 | 5.68E-11 | NUCKS1     | 13.57 | -1.42 | 3.35E-11 |
| YIF1B     | 9.88  | -2.92 | 4.96E-25 | NUDT3      | 10.73 | -1.49 | 3.70E-24 |
| PHF6      | 10.39 | -1.88 | 5.45E-23 | OSBPL1A    | 10.04 | -1.10 | 7.70E-09 |
|           |       |       |          | P4HA1      | 12.29 | -1.09 | 5.23E-11 |
|           |       |       |          | PAN2       | 10.47 | -1.19 | 1.33E-10 |
|           |       |       |          | PCYT1B     | 7.18  | -1.49 | 2.16E-02 |
|           |       |       |          | PDCD4      | 11.46 | -1.09 | 3.03E-16 |
|           |       |       |          | PHB2       | 13.07 | -1.12 | 3.78E-09 |
|           |       |       |          | PI4K2B     | 9.26  | -1.17 | 2.27E-08 |
|           |       |       |          | PRKD3      | 12.05 | -1.40 | 1.57E-27 |
|           |       |       |          | PXN        | 13.96 | -1.03 | 7.17E-08 |
|           |       |       |          | RAD18      | 10.23 | -1.29 | 1.18E-16 |
|           |       |       |          | RNF170     | 8.88  | -1.57 | 1.30E-09 |
|           |       |       |          | RPA1       | 12.02 | -1.06 | 6.40E-09 |
|           |       |       |          | SCARB1     | 11.49 | -2.17 | 1.46E-23 |
|           |       |       |          | SERPINE1   | 11.06 | -1.86 | 4.90E-08 |
|           |       |       |          | SH3BP1     | 9.11  | -1.35 | 2.43E-09 |
|           |       |       |          | SIRPA      | 7.96  | -3.37 | 2.27E-28 |
|           |       |       |          | SLC25A36   | 11.80 | -1.03 | 7.87E-07 |
|           |       |       |          | SLC26A2    | 13.29 | -1.34 | 3.31E-07 |
|           |       |       |          | SLC7A8     | 10.72 | -1.70 | 1.04E-09 |
|           |       |       |          | SNTB2      | 11.57 | -1.22 | 2.64E-06 |
|           |       |       |          | SPTLC2     | 10.40 | -1.00 | 3.04E-09 |
|           |       |       |          | ST6GALNAC3 | 7.01  | -2.34 | 2.17E-12 |
|           |       |       |          | SWAP70     | 10.23 | -1.41 | 5.23E-18 |
|           |       |       |          | TBC1D14    | 11.97 | -1.58 | 3.82E-29 |
|           |       |       |          | TOMM40     | 11.53 | -1.01 | 5.41E-06 |
|           |       |       |          | TPM3       | 13.36 | -2.41 | 1.19E-67 |



|        |       |       |          |
|--------|-------|-------|----------|
| UBE2W  | 9.58  | -1.17 | 8.90E-04 |
| UBTF   | 11.92 | -1.07 | 8.03E-08 |
| USP13  | 10.13 | -1.35 | 7.70E-09 |
| UXS1   | 11.65 | -1.00 | 1.44E-03 |
| VASN   | 6.38  | -1.92 | 7.67E-07 |
| ZBTB8A | 6.47  | -1.30 | 1.37E-03 |
| ZNF395 | 9.84  | -1.46 | 4.73E-11 |

**Table S4. Human primers sequences used in the study**

| Gene   | Forward                | Reverse                 |
|--------|------------------------|-------------------------|
| ACTA2  | CTGTTCCAGCCATCCTTCAT   | TCATGATGCTGTTGTAGGTGGT  |
| AMOTL2 | GCGACTGTCAGAACAACTGC   | GCACCTTTAACCTGCTTTCCA   |
| AXL    | GTGGGCAACCCAGGGAATATC  | GTACTGTCCCCTGTCTCGGAAAG |
| COL1A1 | GGGATTCCCTGGACCTAAAG   | GGAACACCTCGCTCTCCA      |
| COL1A2 | GTTGCTGCTTGCAGTAACCTT  | AGGGCCAAGTCCAACCTCCTT   |
| CTGF   | ACCGACTGGAAGACACGTTTG  | CCAGGTCAGCTTCGCAAGG     |
| CYR61  | TGAAGCGGCTCCCTGTTTT    | CGGGTTTCTTTTACAAGGCG    |
| FN1    | TGTTATGGAGGAAGCCGAGGTT | GCAGCGGTTTGCGATGGT      |
| FSCN1  | CCAGCTGCTACTTTGACATCGA | GCTCTGAGTCCCCTGCTGTCT   |
| GDNF   | GGCAGTGCTTCTTAGAAGAGA  | AAGACACAACCCCGTTTTTTG   |
| LOX    | CGACCCTTACAACCCCTACA   | AAGTAGCCAGTGCCGTATCC    |
| LOXL2  | CCTGGGGAGAGGACATACAA   | CTCGCAGGTGACATTCTTCA    |
| MYL9   | CATCCATGAGGACCACCTCCG  | CTGGGGTGGCCTAGTCGTC     |
| RPL32  | CCTTGTGAAGCCCAAGATCG   | TGCCGGATGAACTTCTTGGT    |
| TAGLN2 | ATGGCACGGTGCTATGTGAG   | CCCACCCAGATTCATCAGCG    |
| THBS1  | AGACTCCGCATCGCAAAGG    | TCACCACGTTGTTGTCAAGGG   |
| TNC    | TCCCAGTGTTCCGGTGGATCT  | TTGATGCGATGTGTGAAGACA   |

**Table S5. Mouse primers sequences used in the study.**

| Gene   | Forward                 | Reverse                |
|--------|-------------------------|------------------------|
| Acta2  | CCCAGACATCAGGGAGTAATGG  | TCTATCGGATACTTCAGCGTCA |
| Amotl2 | AGGGACAATGAGCGATTGCAG   | CCTCACGCTTGGAAAGAGGT   |
| Col1a1 | GCTCCTCTTAGGGGCCACT     | ATTGGGGACCCTTAGGCCAT   |
| Ctgf   | GGCCTCTTCTGCGATTTCG     | GCAGCTTGACCCTTCTCGG    |
| Cyr61  | TAAGGTCTGCGCTAAACAACCTC | CAGATCCCTTTCAGAGCGGT   |
| Fn1    | ATGTGGACCCCTCCTGATAGT   | GCCCAGTGATTCAGCAAAGG   |
| Myl9   | AGAGGGCTACGTCCAATGTCT   | CTCCAGATACTCGTCTGTGGG  |
| Rpl32  | AAAACAGACGCACCATCGAA    | TTCAGGTGACCACATTCAGGG  |
| Tagln2 | GCTATGGCATTAAACACCACGG  | CCCAGGTTTATTAGTGTCCGC  |
| Tnc    | TTTGCCCTCACTCCCGAAG     | AGGGTCATGTTTAGCCCACTC  |

**Table S6. List of antibodies used in the study.**

| <b>Primary Antibody</b>                       | <b>Company</b>    | <b>Catalog Number</b> | <b>Dilution</b>    |
|-----------------------------------------------|-------------------|-----------------------|--------------------|
| p-AKT (Ser473)                                | Cell Signaling    | 9271                  | WB 1:1000          |
| AKT (pan)                                     | Cell Signaling    | 4691                  | WB 1:1000          |
| $\alpha$ SMA                                  | Abcam             | ab5694                | WB 1:1000          |
| AXL                                           | Cell Signaling    | 4566                  | WB 1:1000          |
| CDK2                                          | Santa Cruz        | sc-6248               | WB 1:500           |
| COL1                                          | Abcam             | ab34710               | WB 1:3000          |
| CCND1                                         | BD Biosciences    | 556470                | WB 1:1000          |
| E2F1                                          | Cell Signaling    | 3742                  | WB 1:1000          |
| EGFR                                          | Santa Cruz        | sc-373746             | WB 1:500           |
| p-ERK1/2<br>(Thr202/Tyr204)                   | Cell Signaling    | 9101                  | WB 1:1000          |
| ERK2                                          | Santa Cruz        | sc-1647               | WB 1:500           |
| FAK                                           | Upstate           | 05-182                | WB 1:1000          |
| p-FAK (Tyr397)                                | Cell Signaling    | 3283                  | WB 1:500           |
| FN1                                           | Santa Cruz        | sc-8422               | WB 1:500, IF 1:100 |
| FSCN1                                         | Santa Cruz        | sc-21743              | IF 1:100           |
| FSCN1                                         | Proteintech       | 66321-1-Ig            | WB 1:1000          |
| HSP60                                         | Santa Cruz        | sc-57840              | WB 1:500           |
| HSP90                                         | Santa Cruz        | sc-13119              | WB 1:500           |
| LOX                                           | Novus Biologicals | NB100-2527SS          | WB 1:1000          |
| LOXL2                                         | R&D Systems       | AF2639                | WB 1:1000          |
| MITF                                          | Sigma             | HPA003259             | WB 1:1000          |
| MLC2                                          | Cell Signaling    | 3672                  | WB 1:1000          |
| p-MLC2<br>(Thr18/Ser19)                       | Cell Signaling    | 3674                  | WB 1:500           |
| MRTFA                                         | Santa Cruz        | sc-390324             | IF 1:100           |
| NGFR (p75NTR)                                 | Cell Signaling    | 8238                  | WB 1:1000          |
| p27 Kip1                                      | Cell Signaling    | 3686                  | WB 1:1000          |
| Paxillin                                      | BD Biosciences    | P13520                | WB 1:3000          |
| p-Paxillin (Tyr118)                           | Cell Signaling    | 2541                  | WB 1:1000 IF 1:50  |
| PDGFR $\beta$                                 | Santa Cruz        | sc-374573             | WB 1:500           |
| p-Rb                                          | Cell Signaling    | 9308                  | WB 1:1000          |
| Rb                                            | Cell Signaling    | 9309                  | WB 1:1000          |
| p-SMAD3<br>(Ser433/435)/SMAD1<br>(Ser463/465) | Cell Signaling    | 9514                  | WB 1:1000          |
| SMAD1/2/3                                     | Santa Cruz        | sc-7960               | WB 1:500           |
| SOX9                                          | Santa Cruz        | sc-166505             | WB 1:500           |
| SOX10                                         | Cell Signaling    | 89356                 | WB 1:1000          |
| pSrc family (Tyr416)                          | Cell Signaling    | 6943                  | WB 1:1000          |
| Src                                           | Cell Signaling    | 2109                  | WB 1:1000          |
| STAT3                                         | Cell Signaling    | 9139                  | WB 1:1000          |
| p-STAT3 (Tyr705)                              | Cell Signaling    | 9145                  | WB 1:1000          |
| Survivin                                      | Cell Signaling    | 2808                  | WB 1:1000          |
| TAGLN2                                        | Genetex           | GTX115082             | WB 1:1000          |

|       |                |           |           |
|-------|----------------|-----------|-----------|
| THBS1 | Santa Cruz     | sc-393504 | WB 1:500  |
| TNC   | R&D Systems    | AF3358    | WB 1:1000 |
| YAP   | Cell Signaling | 14074     | IF 1:200  |

| <b>Secondary Antibody</b>            | <b>Company</b> | <b>Catalog Number</b> | <b>Dilutions</b> |
|--------------------------------------|----------------|-----------------------|------------------|
| Anti-mouse IgG, HRP-linked antibody  | Cell Signaling | 7076                  | WB 1:2000        |
| Anti-rabbit IgG, HRP-linked antibody | Cell Signaling | 7074                  | WB 1:2000        |
| Anti-goat IgG, HRP-linked antibody   | Santa Cruz     | sc-2354               | WB 1:5000        |
| Goat- anti-mouse, Alexa Fluor® 488   | Invitrogen     | A11001                | IF 1:200         |
| Goat anti-mouse, Alexa Fluor® 594    | Invitrogen     | A11005                | IF 1:200         |
| Goat anti-rabbit, Alexa Fluor® 594   | Invitrogen     | A11012                | IF 1:200         |

## SUPPLEMENTARY FIGURE LEGENDS

### **Fig. S1. Administration of Nintedanib/BIBF1120 re-sensitizes melanoma cells to MAPK**

#### **targeted therapies, delays tumor relapse and normalizes MAPKi-induced ECM remodeling and**

#### **miR-143/145 expression. (A-D) YUMM1.7 cells were subcutaneously inoculated into C57BL/6 mice**

and when tumors reached 100 mm<sup>3</sup> mice were treated with the indicated therapies. (A) Individual

graphics showing tumor growth following treatment. (B) Normalized expression of

myofibroblast/CAF and ECM-related genes assessed by RT-qPCR in individual tumors treated as

indicated. Data is represented as median with range (n=5). One-way ANOVA has been used for

statistical analysis. \*P≤0.05, \*\*P≤0.01, \*\*\*\*P≤0.0001. (C-E) Human M238P cells were treated

with MAPK-targeted therapies (BRAFi, Vemurafenib + MEKi, Trametinib) (1 μM),

BIBF1120 (BIBF) (2 μM) or with MAPK-targeted therapies (1 μM) plus BIBF (2 μM) for 72

h. (C) Heatmap showing the expression of ECM, myofibroblast/CAF markers and phenotype

switch markers by RT-qPCR (n=3). (D) Crystal violet viability assay of M238P cells treated

with MAPK-targeted therapies (BRAFi, Vemurafenib + MEKi, Trametinib) (1 μM),

BIBF1120 (BIBF) (2 μM) or with MAPK-targeted therapies (1 μM) plus BIBF (2 μM) for 72

h. Paired Student t-test was used for statistical analysis. \*\*\*\*P≤0.0001. Data is represented as

mean ± SD from a triplicate representative of 3 independent experiments. (E) Western blot

showing the expression of ECM, myofibroblast/CAF markers and activation levels of signaling

pathways (AKT and MAPK) in the different conditions.

### **Fig. S2. High expression of miR-143/145 is correlated with an undifferentiated/mesenchymal-**

#### **like BRAFi-resistant phenotype in melanoma cells. (A) Relative miRNA expression levels have**

been quantified in parental (P) and paired resistant (R) cells (M238, UACC62, M229, M249) by RT-

qPCR. Log<sub>2</sub> (R/P) is shown for each cell line. (B-F) Relative miRNA expression levels have been

quantified in human melanoma cell lines (M238P, UACC62P, 1205Lu) or short term patient-derived

cell lines (MM034, MM099) treated or not for 72 h with MAPK-targeted therapies (BRAFi,

Vemurafenib 3  $\mu$ M), (MEKi, Trametinib 1  $\mu$ M), (BRAFi plus MEKi, 1  $\mu$ M) by RT-qPCR and normalized to miR-16-5p. (A-F) Data is represented as mean  $\pm$  SE from a triplicate representative of at least 3 independent experiments. Paired Student t-test has been used for statistical analysis. \* $P \leq 0.05$  \*\* $P \leq 0.01$  \*\*\* $P \leq 0.001$  \*\*\*\* $P \leq 0.0001$ .

**Fig. S3. MiR-143/145 cluster plays a role in ECM reprogramming.** (A) qPCR analysis showing the level of miR-143-3p and miR-145-5p expression after transient transfection of miRNAs mimics (72 h, 30 nM) in 3 distinct melanoma cell lines (M238P, UACC62P, M229P). Data is represented as mean  $\pm$  SE from a triplicate representative of at least 3 independent experiments. Paired Student t-test has been used for statistical analysis. \* $P \leq 0.05$  \*\* $P \leq 0.01$  \*\*\* $P \leq 0.001$  \*\*\*\* $P \leq 0.0001$  (B) Immunoblot analysis of ECM remodeling markers on total cell lysates (M229P and UACC62P) or conditioned medium (M229P) from parental cells transfected with the indicated mimics.

**Fig. S4. MiR-143/145 cluster drives melanoma cell plasticity and dedifferentiation.** Melanoma cells were transfected with control (miR neg), miR-143 or miR-145 mimics (72 h, 30 nM). (A) Immunoblot analysis of cell cycle markers on lysates from M238P cells. (B) Proliferation curves of parental cells (UACC62P) following transient transfection with miRNA mimics. Time-lapse analysis of cells has been performed with the IncuCyte system. Graph shows quantification of cell confluence. 2-way ANOVA analysis has been used for statistical analysis. \*\*\*\* $P \leq 0.0001$ . (C) Cell cycle distribution of cells cultured in the different conditions. Histograms represent the percentage of cells in different phases of the cell cycle. (D) Migration assay of melanoma cells (UACC62P) following transient transfection with miRNA mimics in Boyden chambers. Representative images show migration in control and miR-143-3p or miR-145-5p transfected cells. The histogram represents the quantitative determination of data obtained using ImageJ software. Paired Student t-test has been used for statistical analysis. \*\* $P \leq 0.01$ , \*\*\*\* $P \leq 0.0001$ . (E) Immunoblot analysis of phenotype switch markers on lysates from parental cells (M229P) transfected with the indicated mimics.

**Fig. S5. Stable expression of the miR-143/145 cluster promotes ECM remodeling and drives melanoma cell dedifferentiation.** (A) qPCR analysis showing the level of miR-143-3p and miR-145-5p expression after stable expression following lentivirus transduction of 2 parental cell lines (M238P, UACC62P). Data is represented as mean  $\pm$  SE from a triplicate representative of at least 3 independent experiments. Paired Student t-test has been used for statistical analysis. \*\*\*  $P \leq 0.001$ , \*\*\*\*  $P \leq 0.0001$ . Immunoblot analysis of ECM remodeling (B), cell cycle (C) and phenotype switch markers (D) on total cell lysates from the different stable cell lines. (E) Invasion assay in Boyden chambers. Representative images show invasion in control and miR-143/145 expressing cells (M238P). The histogram represents the quantitative determination of data obtained using ImageJ software. Paired Student t-test has been used for statistical analysis. \*\*\*\*  $P \leq 0.0001$ . (F) Viability of M238P cells transduced with a control or a miR-143/145 cluster lentivirus was assessed by crystal violet staining upon MAPKi treatment (6 days, BRAFi, Vemurafenib 3  $\mu$ M, MEKi, Trametinib, 3  $\mu$ M or BRAFi + MEKi 5  $\mu$ M). Paired Student t-test has been used for statistical analysis. \*\*\*\*  $P \leq 0.0001$ .

**Fig. S6. miR-143 and miR-145 inhibition reverses the adaptive response of melanoma cells to MAPK pathway inhibition.** Cells were treated with BRAF inhibitor (BRAFi, Vemurafenib) (1  $\mu$ M, 72h) in the presence or the absence of anti-miR inhibitors (50 nM, 72 h). (A) RT-qPCR analysis of miR-143-3p and miR-145-5p expression in parental cells (M238P and 1205Lu) treated with the different combinations of inhibitors. Data is represented as mean  $\pm$  SE from a triplicate representative of at least 3 independent experiments. Paired Student t-test has been used for statistical analysis. \*\*  $P \leq 0.01$ , \*\*\*  $P \leq 0.001$ , \*\*\*\*  $P \leq 0.0001$ . (B) Crystal violet viability assay of 1205Lu cells treated with the indicated combinations of inhibitors. Data is represented as mean  $\pm$  SD from a triplicate representative of at least 3 independent experiments. One-way ANOVA has been used for statistical analysis. \*\*\*\*  $P \leq 0.0001$ .

**Fig. S7. Characterization of the transcripts produced from the miR-143/145 cluster and FSCN1 loci in parental and mesenchymal resistant melanoma cells.** (A) Screenshot from Integrative Genomic Viewer (IGV) displaying nanopore long-reads RNA-Seq data of the miR-143/-145 cluster /

CARMN and FSCN1 loci in M238P and M238R cells (dataset 3, n=1). A strong increase of total reads associated with the CARMN transcripts in M238R compared to M238P cells is shown while the FSCN1 transcript shows the opposite pattern. The red box highlights the FSCN1 3'UTR containing 2 and 4 predicted sites for miR-143-3p and miR-145-5p, respectively. The sequence, pairing and conservation are shown for each predicted site. **(B)** Sequence of h*FSCN1* 3'UTR miR-143 or miR-145 recognition elements and pairing with miR-143 or miR-145 seeds. Bases mutated in the plasmid used for luciferase assay are underlined. **(C-D)** Western Blot analysis of FSCN1 expression in parental cells (M229P, 1205Lu, UACC62P) transfected with the indicated miRNA mimics (72 h, 30 nM) **(C)** and in parental cells (M238P) transduced with the indicated construct **(D)**.

**Fig. S8. FSCN1 is a functional miR-143/145 target contributing to the phenotypic switch towards an invasive dedifferentiated state.** **(A)** Western Blot analysis of FSCN1 expression in parental and paired resistant cells (M238, UACC62, M229, M249). **(B)** Western Blot analysis of FSCN1 levels in parental cells (UACC62P) treated with MAPK-targeted therapies (BRAFi, Vemurafenib, 3  $\mu$ M), (MEKi, Trametinib, 1  $\mu$ M), (BRAFi + MEKi 1  $\mu$ M) for 72 h. **(C-F)** Cells were transfected with two different sequences of siRNAs vs FSCN1 or with a control siRNA (72 h, 100 nM). **(C)** Immunoblot analysis of cell cycle markers on cell lysates from M229P cells cultured for 72 h following transfection with the different siRNAs. **(D)** Proliferation curves using time-lapse analysis of cells with the IncuCyte system. Graph shows quantification of cell confluence. 2-way ANOVA analysis was used for statistical analysis. \*\*\*\* $P \leq 0.0001$ . **(E)** Migration assay performed in Boyden chambers. Representative images showing migration of UACC62P cells in the indicated conditions. The histogram represents the quantitative determination of data obtained using ImageJ software. Paired Student t-test has been used for statistical analysis. \*\* $P \leq 0.01$  \*\*\*\* $P \leq 0.0001$ . **(F)** Immunoblot analysis of phenotype-switch markers on cell lysates from cells (M229P and UACC62P) transfected with the different siRNAs.

**Fig. S9. FSCN1 restoration promotes the switch of melanoma cells toward a differentiated cell-state.** **(A-B)** Cells were transduced with a control or a FSCN1 lentiviral construct. **(A)** Effect of

FSCN1 overexpression on cell migration (Boyden chambers). Representative images and quantitative determination of data obtained using ImageJ software. Paired Student t-test has been used for statistical analysis. \*\* $P \leq 0.01$ , \*\*\*\* $P \leq 0.0001$ . **(B)** Immunoblot analysis of phenotype-switch markers and ECM remodeling markers on cell lysates from control and FSCN1 overexpressing resistant cells (UACC62R, M229R).

**Fig. S10. The miR-143-/145 cluster/FSCN1 axis regulates actin cytoskeleton dynamics. (A-C)**

M229P or M238P cells were transfected with miR-143-3p, miR-145-5p or a control mimic (72 h, 30nM). **(A)** Quantification of cell area in cells stained for F-actin (red) and nuclei (blue). Data is represented as scatter plot with mean  $\pm$  SD ( $n \geq 30$  cells per condition). Mann-Whitney U test has been used for statistical analysis. \*\* $P \leq 0.01$ , \*\*\*\* $P \leq 0.0001$ . Scale bar 40  $\mu$ M. **(B)** Quantification of focal adhesions number in cells stained for pPaxillin (green) and nuclei (blue). Focal adhesions number is represented as mean  $\pm$  SD ( $n \geq 30$  cells per condition). Each point represents the average number of focal adhesions per cell calculated for each field. Paired Student t-test has been used for statistical analysis. \*\*\* $P \leq 0.001$ , \*\*\*\* $P \leq 0.0001$ . Scale bar 40  $\mu$ M. **(C)** Immunoblot analysis of focal adhesion components and cytoskeleton-related pathways in cells transfected with the different mimics. **(D-E)** Cells were transfected with two different sequences of siRNAs vs FSCN1 or with a control siRNA (72 h, 100 nM). **(D)** Quantification of cell area in cells (1205Lu) stained for F-Actin (red) and nuclei (blue). Data is represented as scatter plot with mean  $\pm$  SD. ( $n \geq 30$  cells per condition). Mann-Whitney U test has been used for statistical analysis. \*\*\*\* $P \leq 0.0001$ . Scale bar 40  $\mu$ M. **(E)** Quantification of focal adhesions number in cells (1205Lu) stained for pPaxillin (green) and nuclei (blue). Focal adhesions number is represented as mean  $\pm$  SD ( $n \geq 30$  cells per condition). Each point represents the average number of focal adhesions per cell calculated for each field. Mann-Whitney U test has been used for statistical analysis. \*\*\*\* $P \leq 0.0001$ . Scale bar 40  $\mu$ M.

**Fig. S11. The miR-143-/145 cluster/FSCN1 axis regulates mechanopathways. (A-C)** UACC62P

cells were transfected with miR-143-3p, miR-145-5p or a control mimic (72 h, 30 nM). **(A)** Effect of miR-143 or miR-145 overexpression on YAP nuclear translocation by immunofluorescence. Cells



were stained for YAP (red) and nuclei (blue). **(B)** Effect of miR-143 or miR-145 overexpression on MRTFA nuclear translocation assessed by immunofluorescence. Cells were stained for MRTFA (green) and nuclei (blue). **(A-B)** Data are represented as scatter plot with mean  $\pm$  SD ( $n \geq 30$  cells per condition). Mann-Whitney U test has been used for statistical analysis. \*\*\*\* $P \leq 0.0001$ . Scale bar 40  $\mu$ M. **(C)** Effect of miR-143 or miR-145 overexpression on the expression of MRTFA/YAP target genes assessed by RT-qPCR. Data are normalized to the expression in control cells. Data is represented as mean  $\pm$  SE from a triplicate representative of at least 3 independent experiments. Paired Student t-test has been used for statistical analysis. \*\* $P \leq 0.01$ , \*\*\* $P \leq 0.001$ , \*\*\*\* $P \leq 0.0001$ . **(D)** Effect of FSCN1 downregulation on YAP nuclear translocation assessed by immunofluorescence in UACC62P cells stained for YAP (red) and nuclei (blue). Data are represented as scatter plot with mean  $\pm$  SD ( $n \geq 30$  cells per condition). Mann-Whitney U test has been used for statistical analysis. \*\*\*\* $P \leq 0.0001$ .

**Fig. S12. FSCN1 restoration impairs the activation of mechanopathways.** BRAFi-resistant M238R cells overexpressing FSCN1 were obtained after transduction with a FSCN1 lentiviral construct. M238R transduced with a Ctrl lentivirus were used as control. **(A-B)** Effect of FSCN1 overexpression on YAP **(A)** and MRTFA **(B)** nuclear translocation assessed by immunofluorescence in cells stained for YAP (red) or MRTFA (green) and nuclei (blue). Data are represented as scatter plot with mean  $\pm$  SD ( $n \geq 30$  cells per condition). Mann-Whitney U test has been used for statistical analysis. \*\*\*\* $P \leq 0.0001$ . Scale bar 40  $\mu$ M. **(C)** RT-qPCR analysis for the expression of YAP1/MRTFA target genes in M238R cells stably overexpressing FSCN1. Data are normalized to the expression in parental cells. Data is represented as mean  $\pm$  SE from a triplicate representative of at least 3 independent experiments. Paired Student t-test has been used for statistical analysis. \*\*\*\* $P \leq 0.0001$

# Diazi et al. fig. S1

## In vivo YUMM.1.7 syngeneic model

**A**

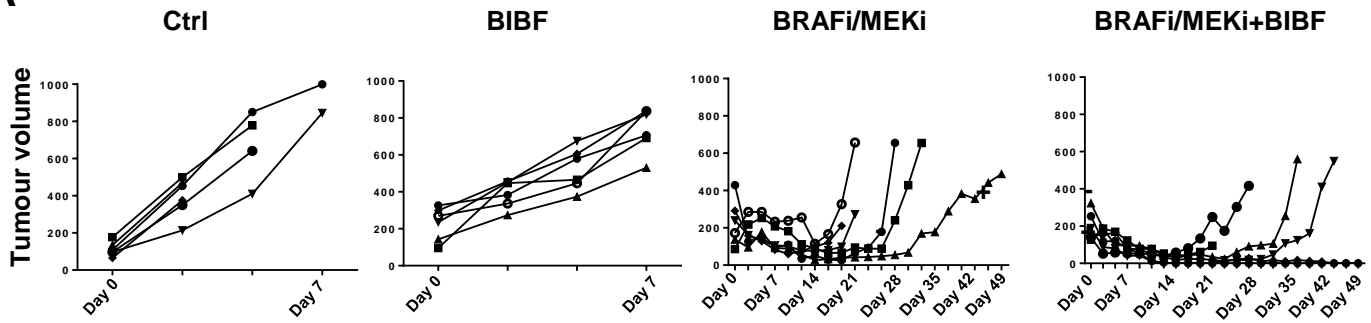

**B**

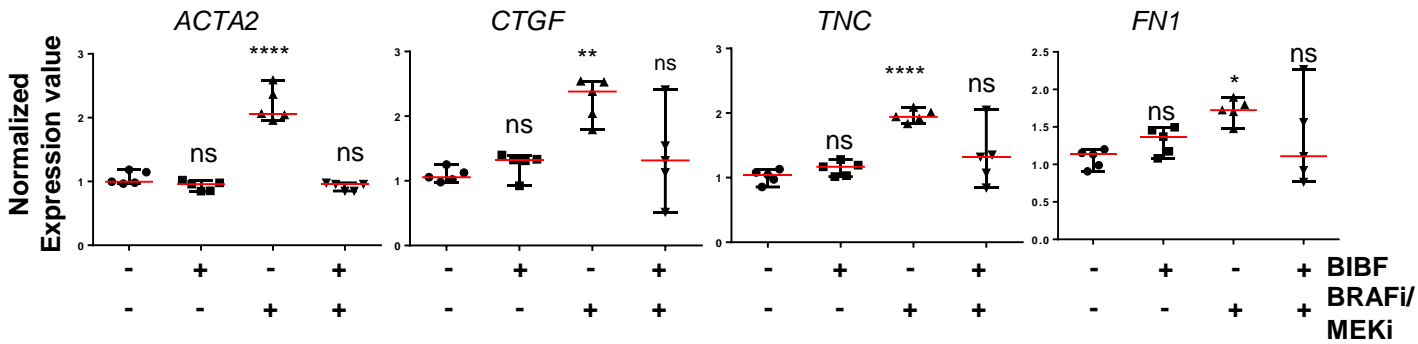

**C**

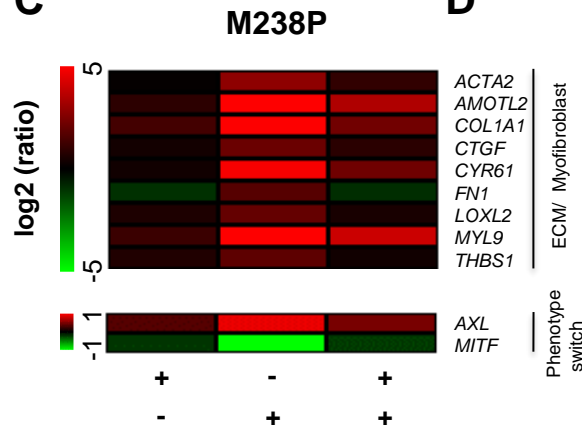

**D**

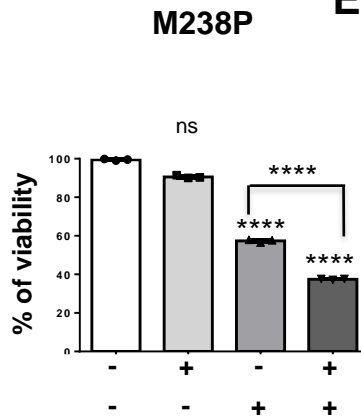

**E**

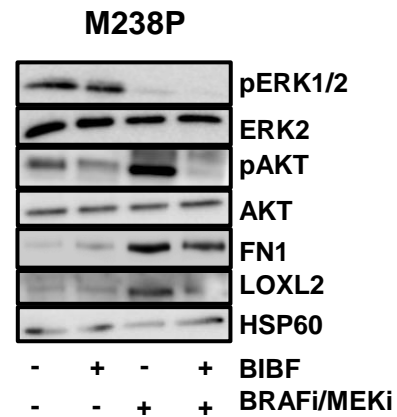

# Diazi et al. fig. S2

● miR-143-3p  
□ miR-145-5p

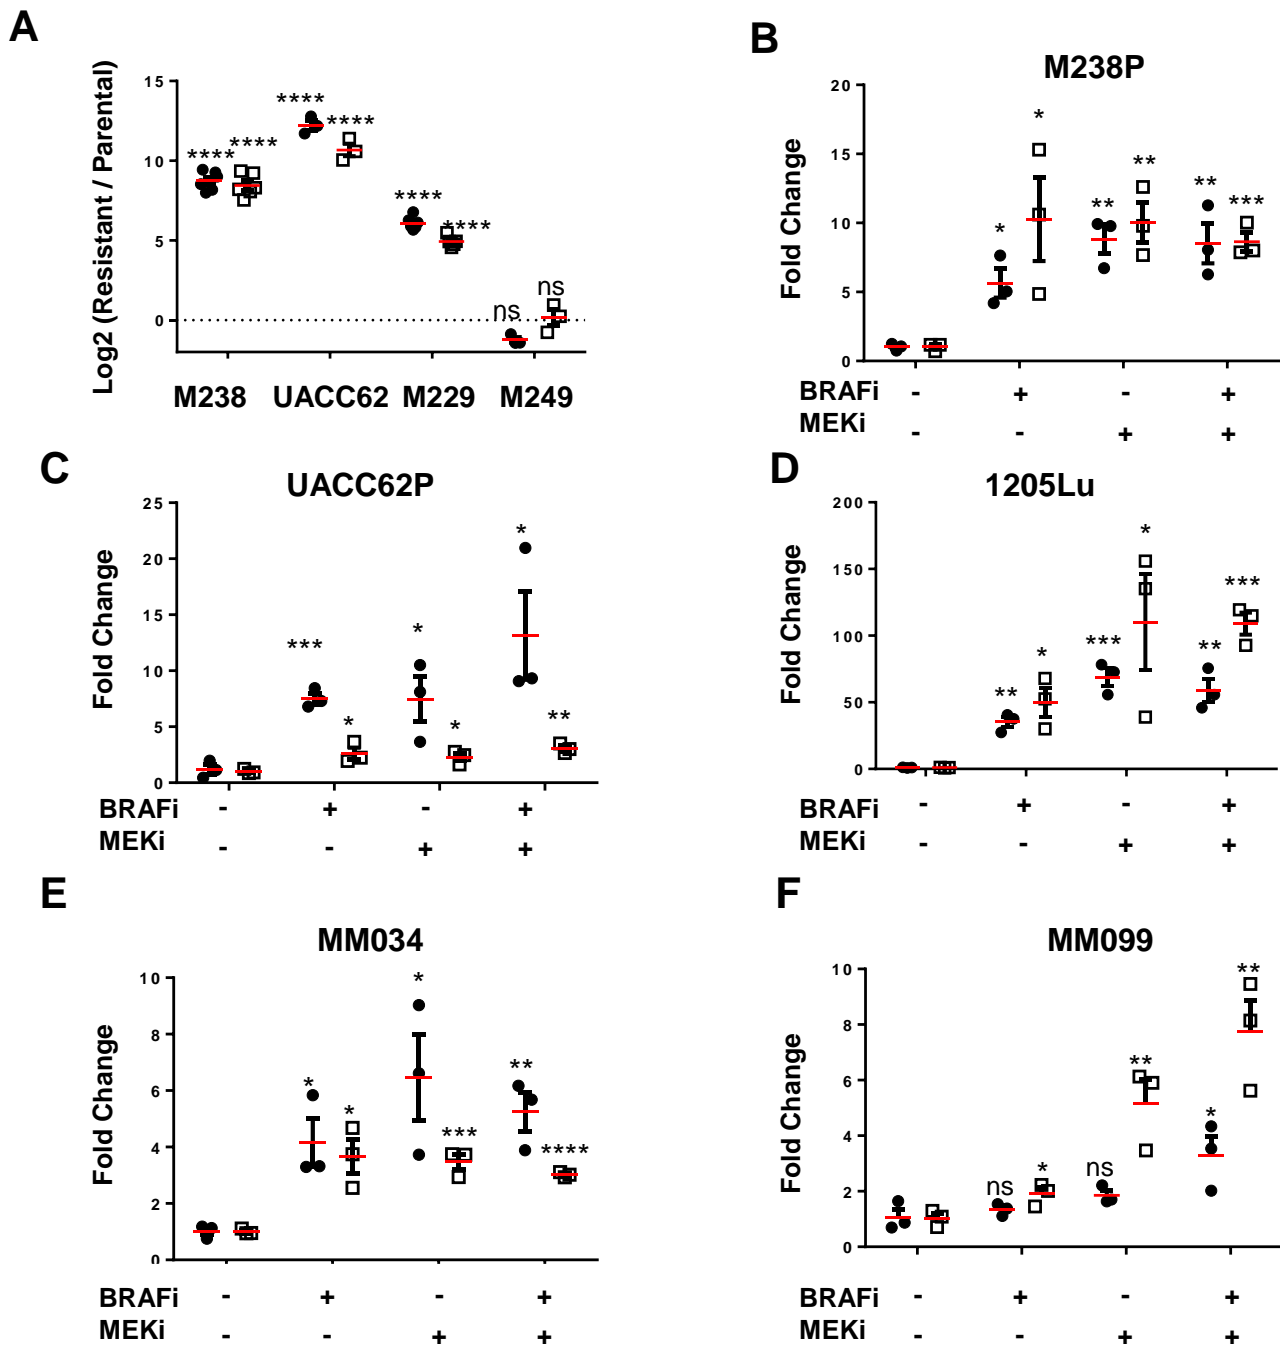

**A**

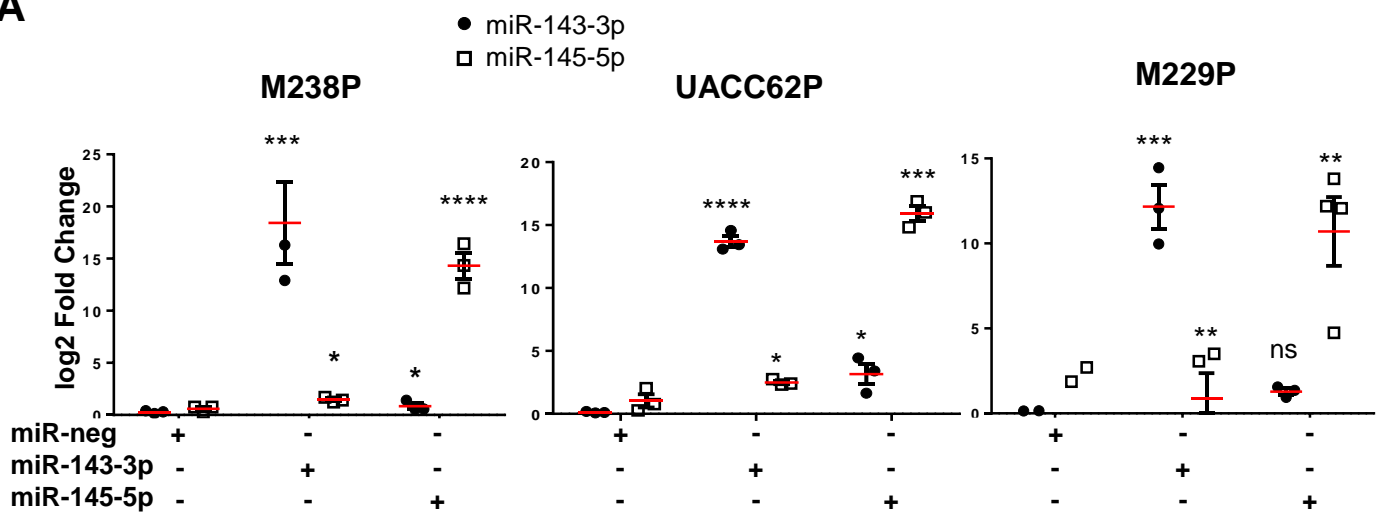

**B**

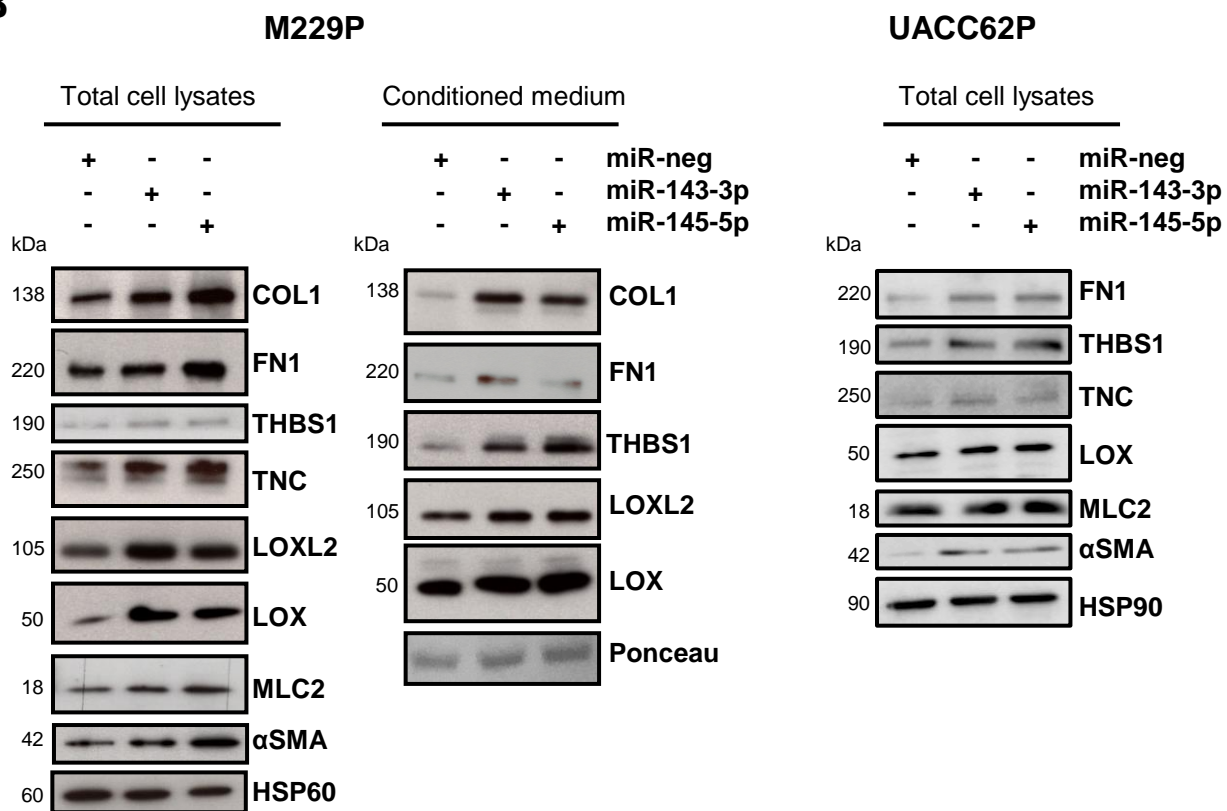

**A**

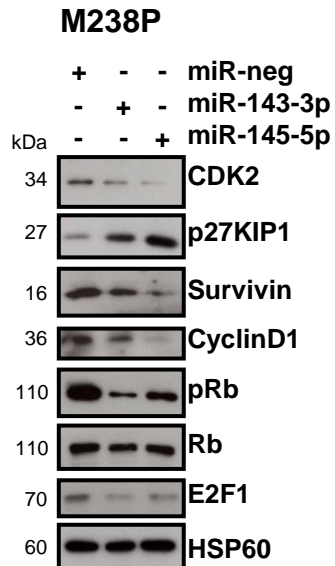

**B**

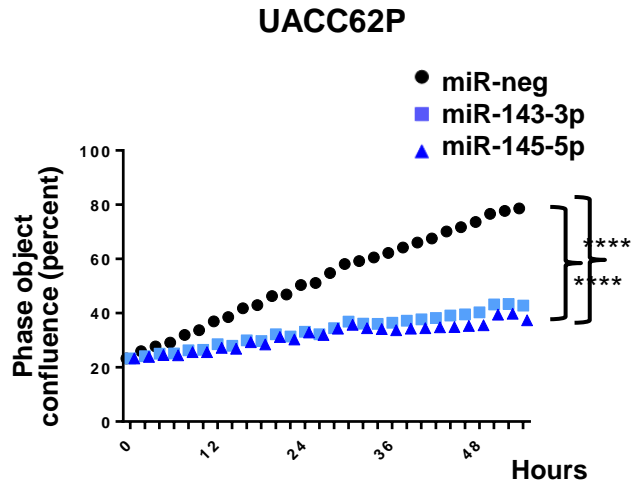

**C**

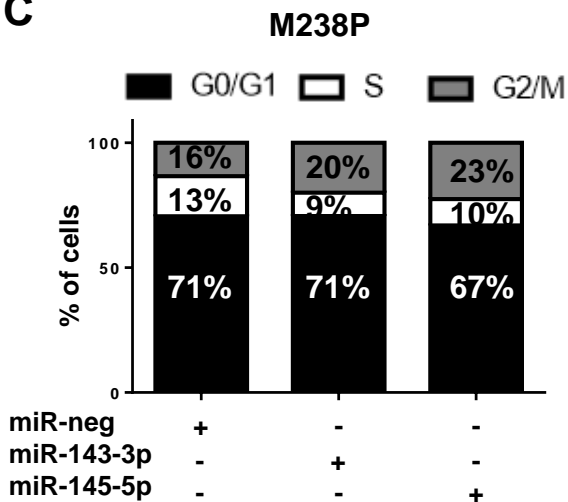

**D**

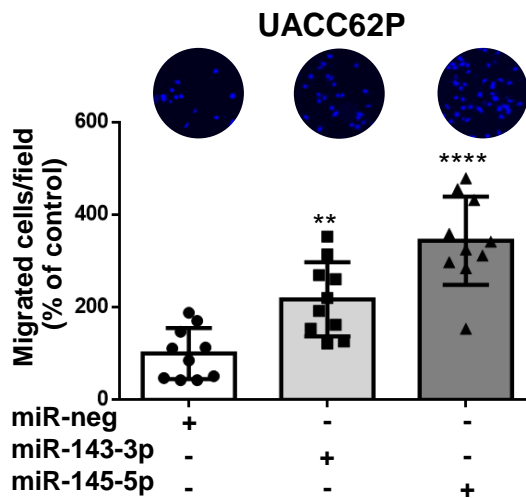

**E**

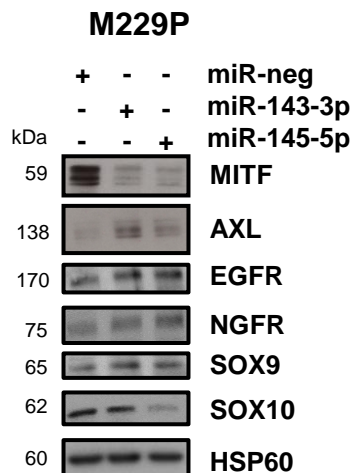

Diazi et al. fig. S5

**A**

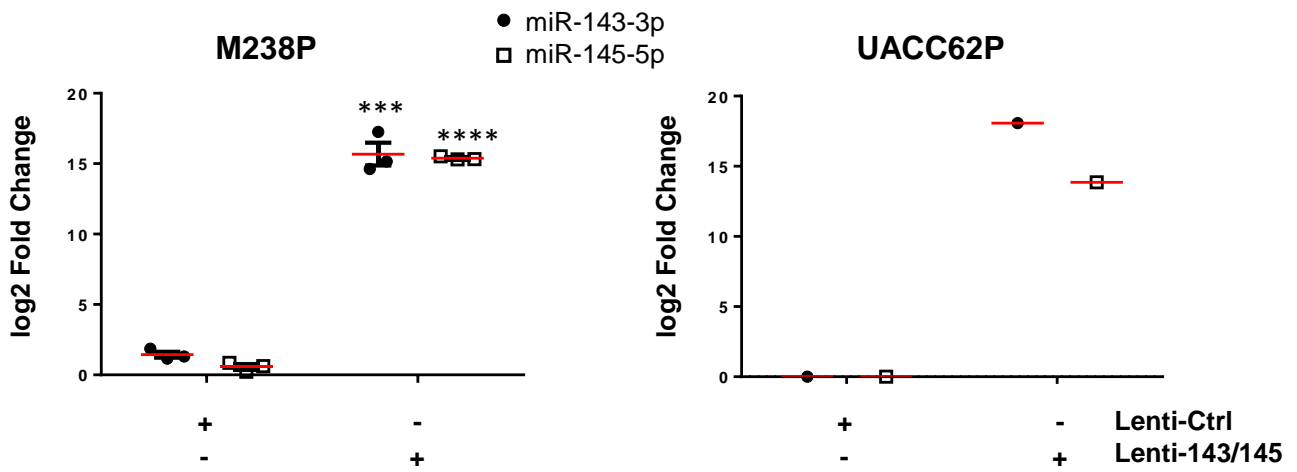

**B**

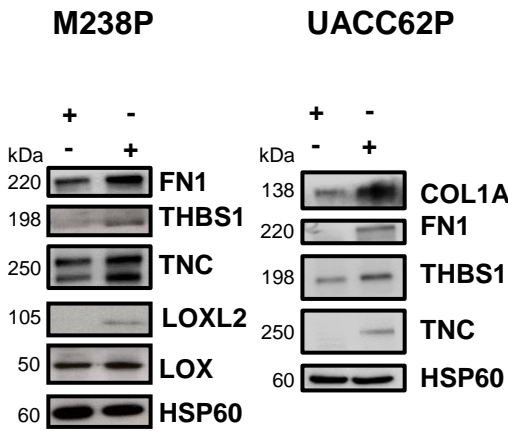

**C**

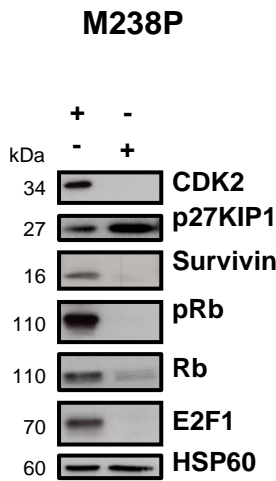

**D**

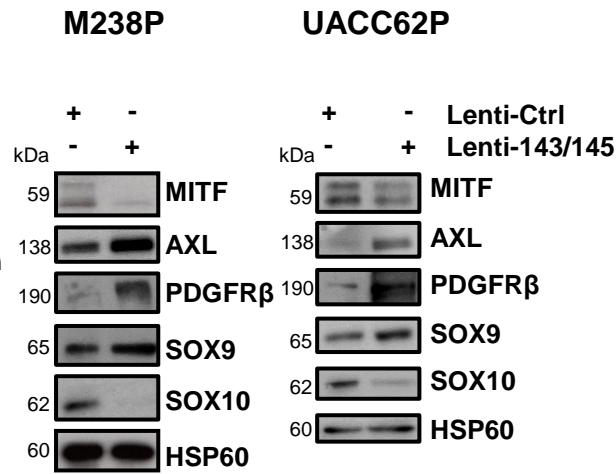

**E**

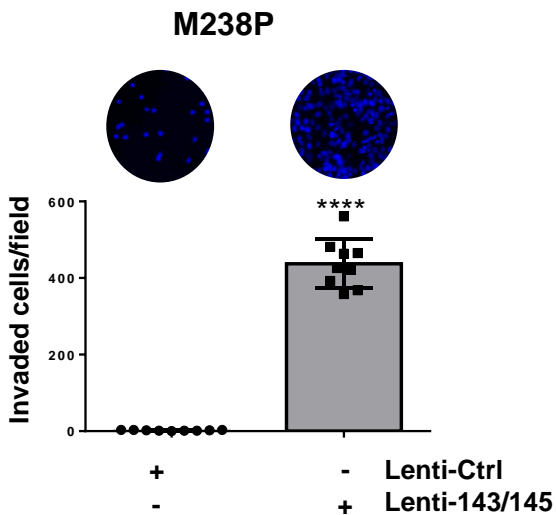

**F**

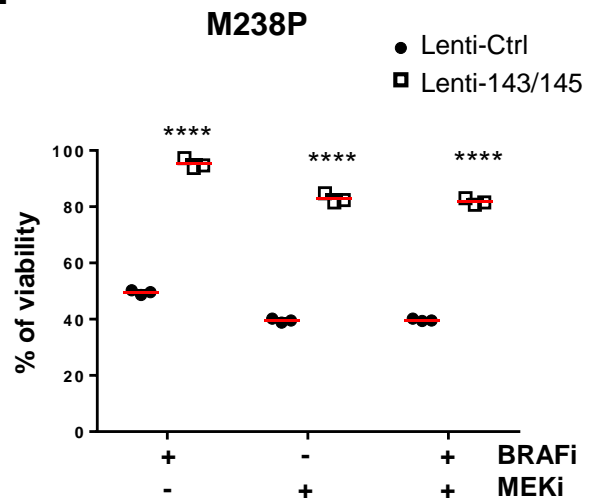

# Diazi et al. fig. S6

● miR-143-3p  
 □ miR-145-5p

**A**

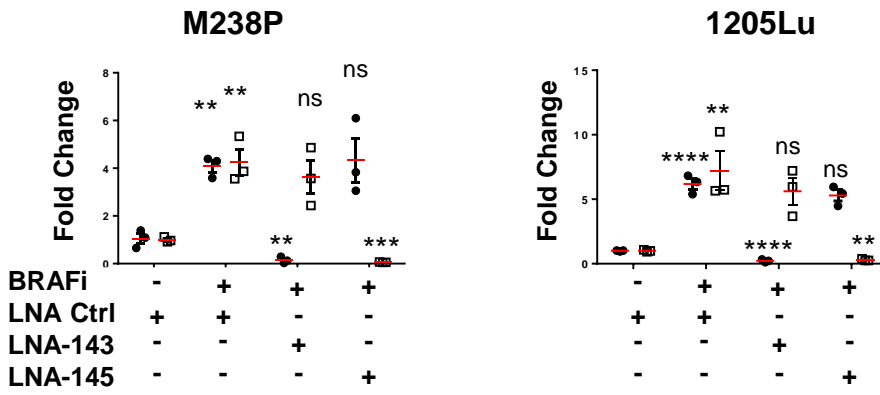

**B**

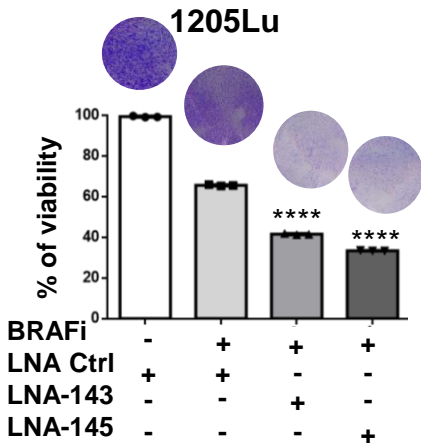

# Diazzi et al. fig. S7

**A**

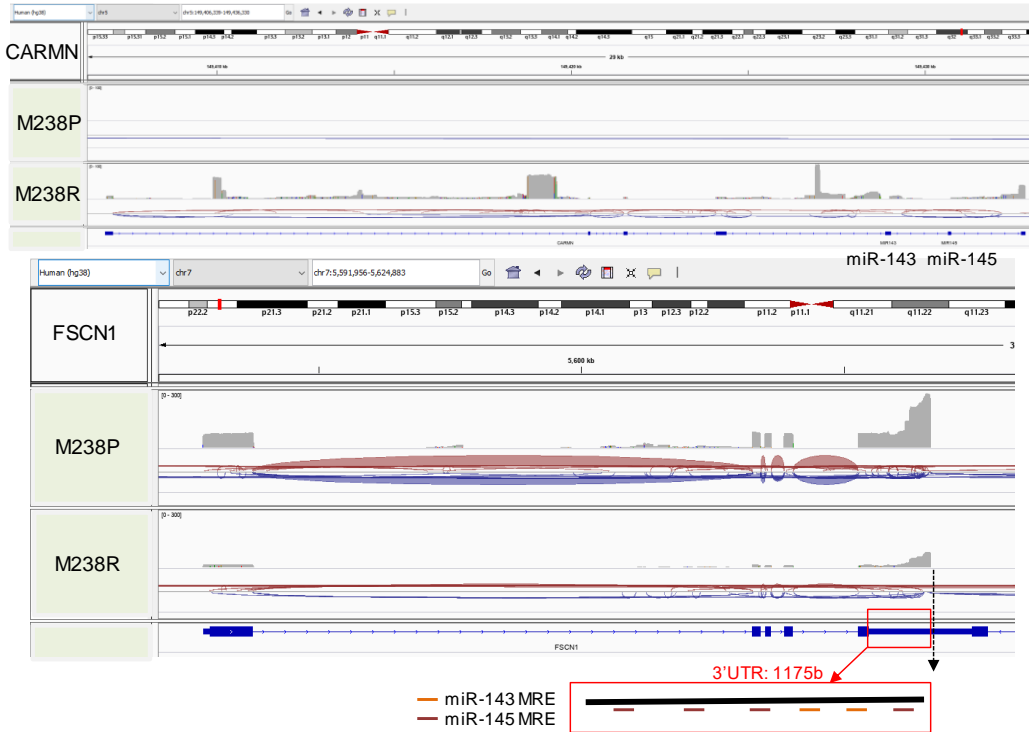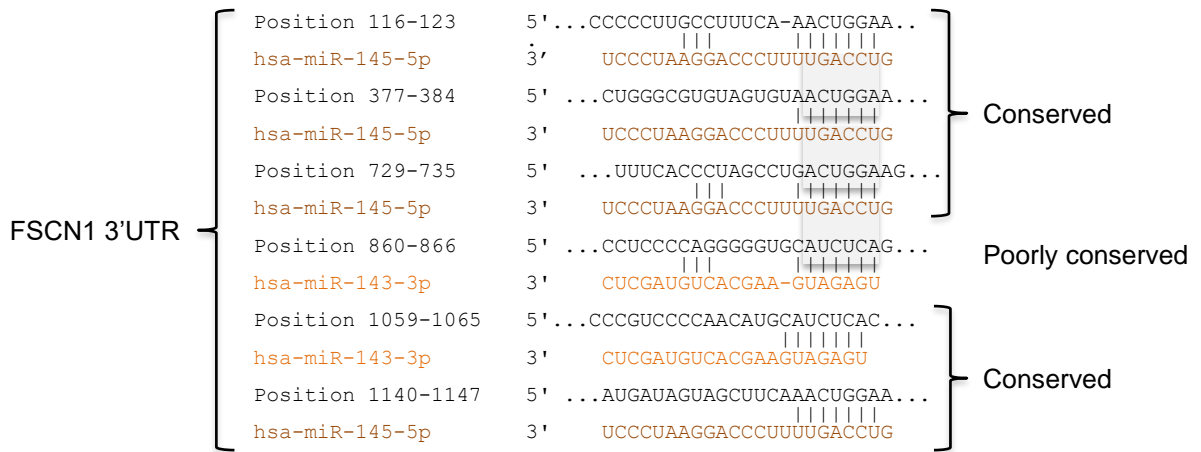

**B**

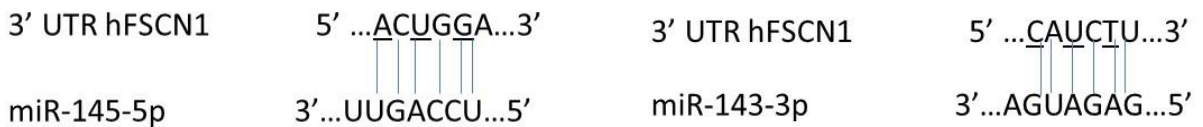

**C**

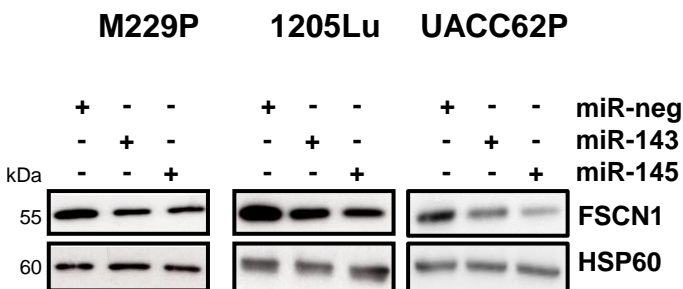

**D**

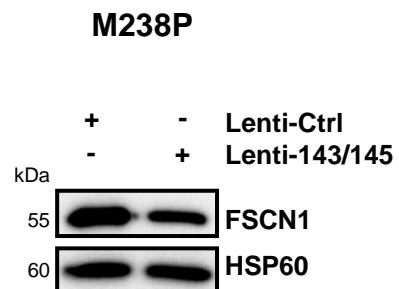



**A**

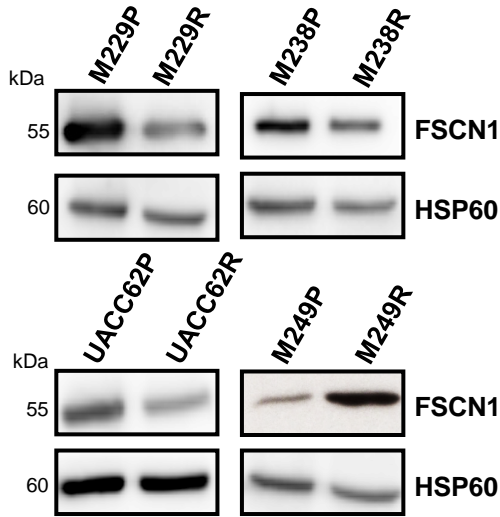

**B**

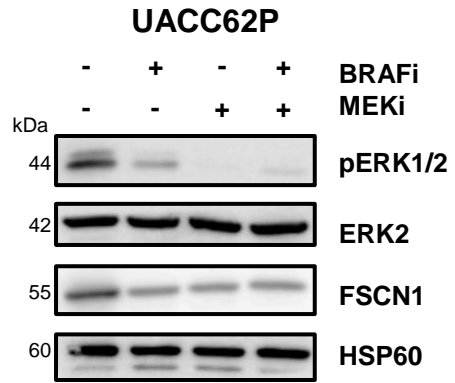

**C**

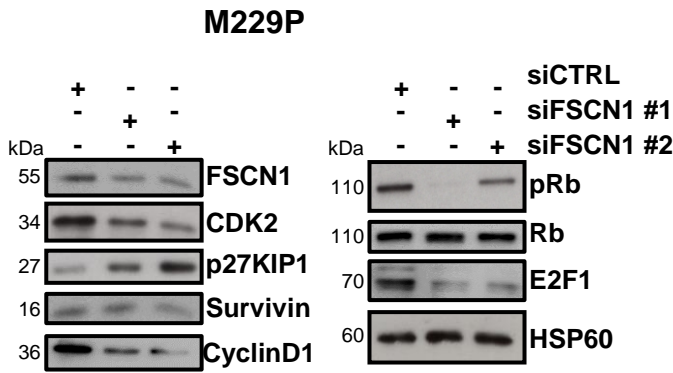

**D**

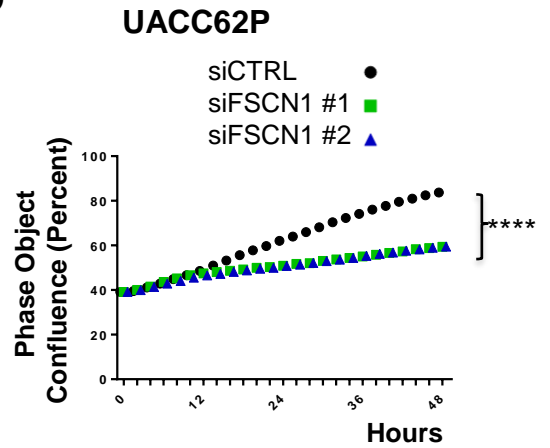

**E**

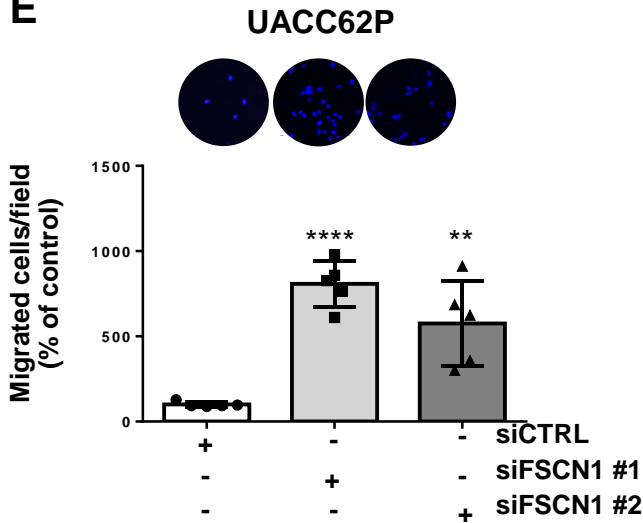

**F**

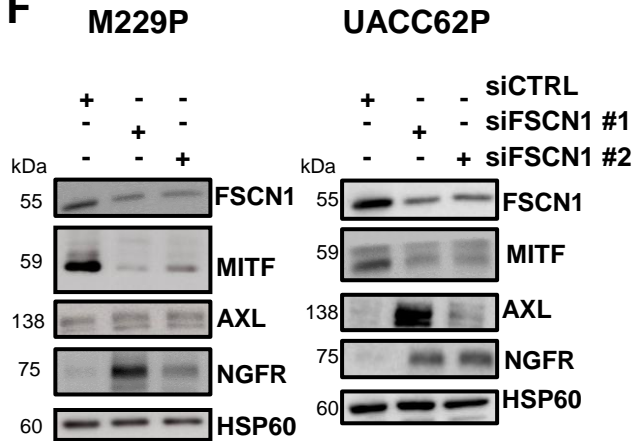

**A**

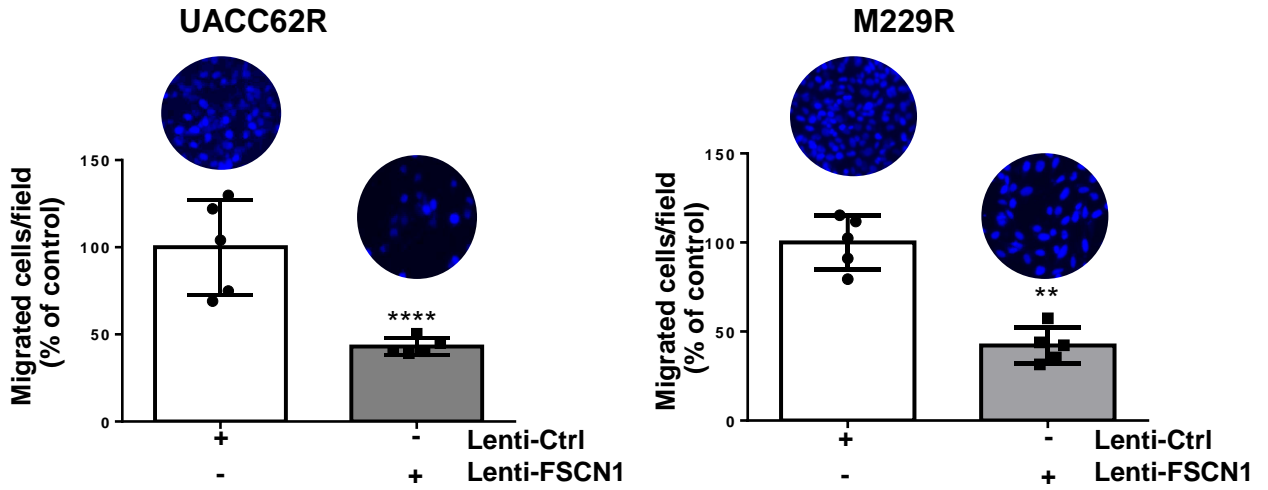

**B**

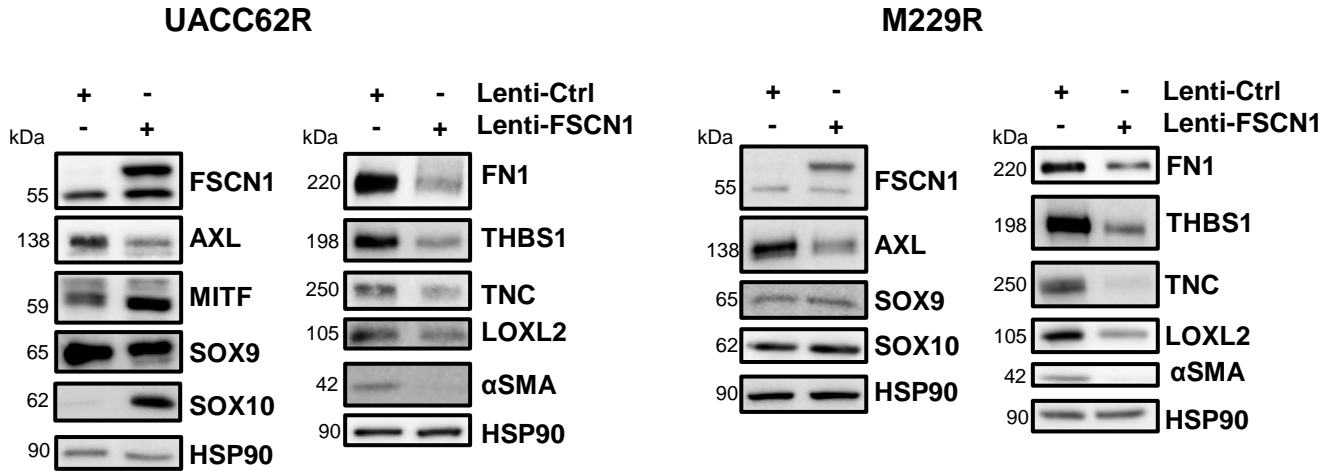

**A**

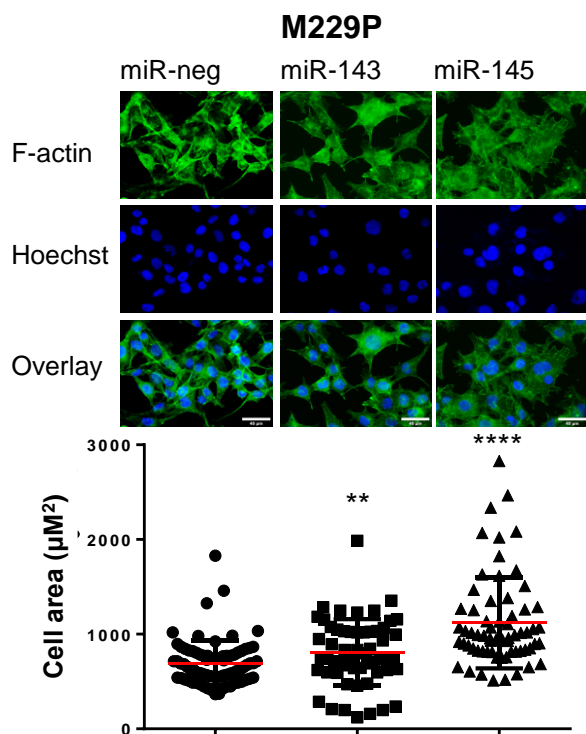

**B**

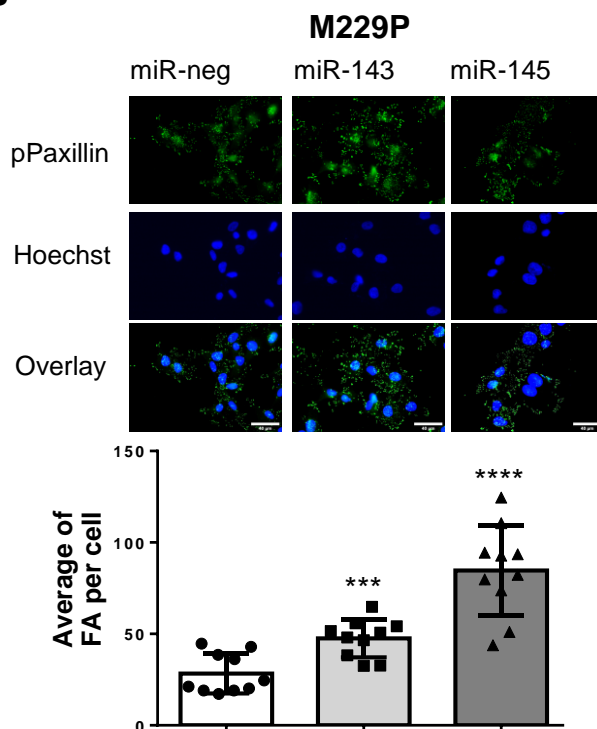

**C**

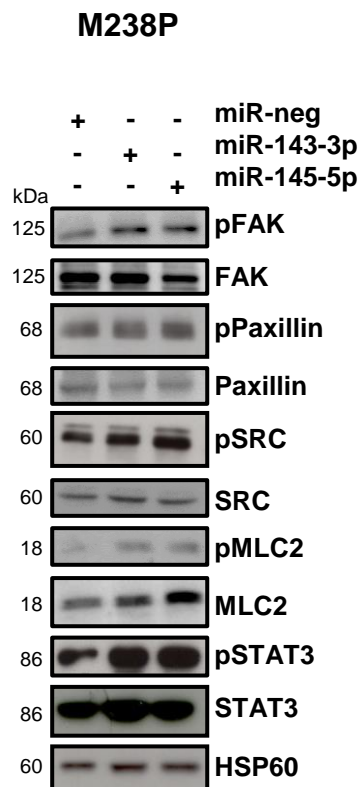

**D**

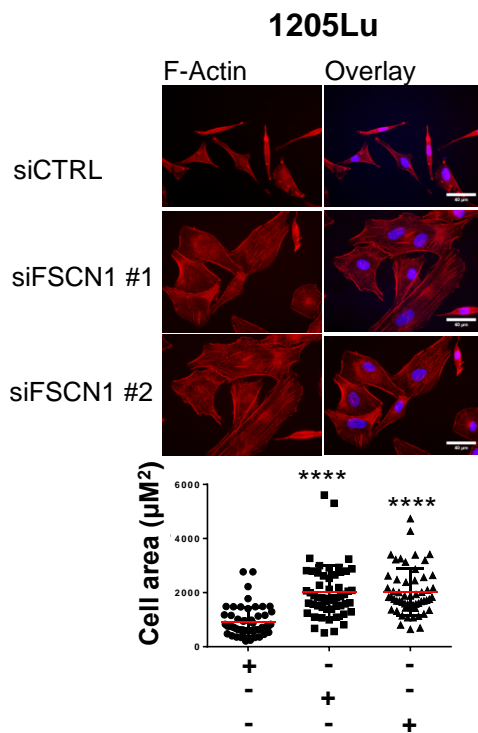

**E**

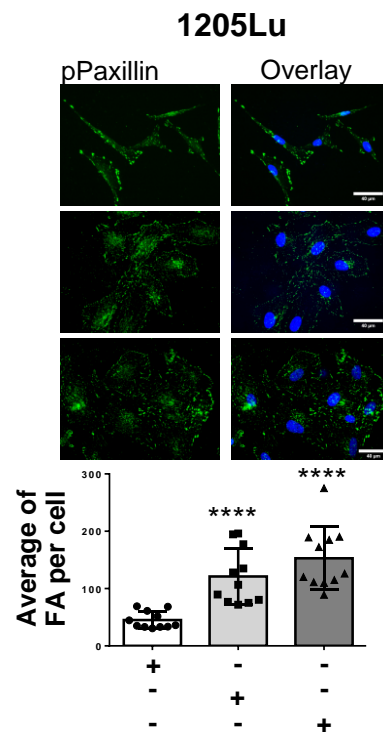



**A**

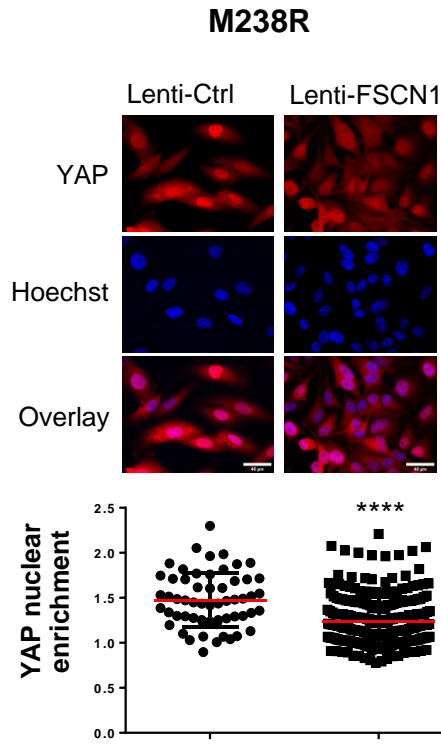

**B**

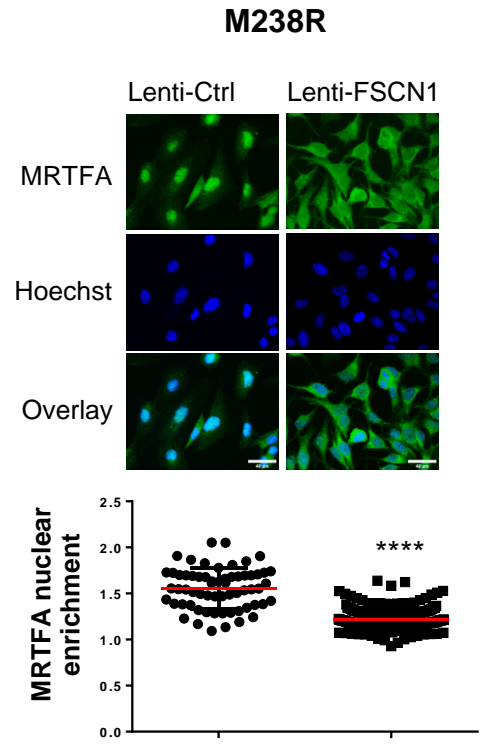

**C**

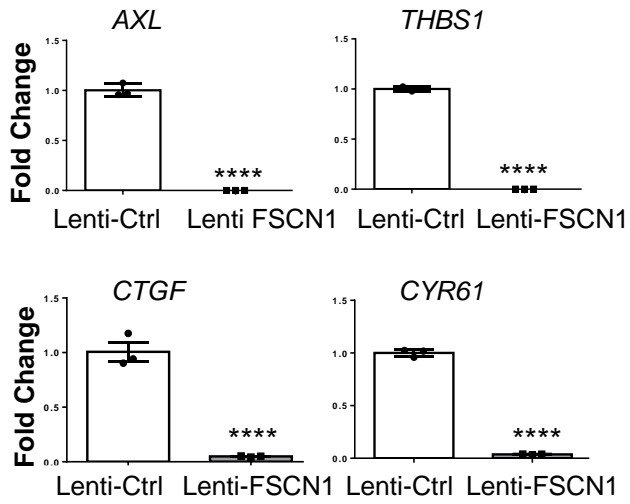

Source: https://www.biorxiv.org/content/biorxiv/early/2021/07/03/2021.07.02.450838.full.pdf
